# Supplementary material
Source: PubMed Central journal article supplement (PMC10372775)
Supplement: NIHMS1911830-supplement-Supplementary_Materials.pdf [file NIHMS1911830-supplement-Supplementary_Materials.pdf]

## Supporting Information for

# “Targeted Profiling of Epitranscriptomic Reader, Writer and Eraser Proteins Regulated by Histone Methylation H3K36me3”

Jiekai Yin<sup>1</sup>, Tianyu F. Qi<sup>1</sup>, Lin Li<sup>2</sup> and Yinsheng Wang<sup>1,2,\*</sup>

<sup>1</sup>Environmental Toxicology Graduate Program, University of California, Riverside, CA 92521-0403, United States

<sup>2</sup>Department of Chemistry, University of California, Riverside, CA 92521-0403, United States

\* Correspondence author: Yinsheng Wang. Telephone: (951)827-2700;

E-mail: [yinsheng.wang@ucr.edu](mailto:yinsheng.wang@ucr.edu)

### Table of Contents

| Contents                                                                                                                                                                       | Page #  |
|--------------------------------------------------------------------------------------------------------------------------------------------------------------------------------|---------|
| <b>Supplementary Experimental Section</b>                                                                                                                                      | S2-S3   |
| <b>Figure S1.</b> Western blot validation of chromatin fractionation.                                                                                                          | S4      |
| <b>Figure S2.</b> Overview of the LC-PRM quantification results for chromatin-associated RWE proteins.                                                                         | S5      |
| <b>Figure S3.</b> Bar charts showing overall expression levels of those RWE proteins downregulated in the chromatin fraction.                                                  | S6      |
| <b>Figure S4.</b> Extracted-ion chromatograms of tryptic peptides from METTL3, METTL14, and YTHDC1, and their corresponding SIL peptides.                                      | S7      |
| <b>Figure S5.</b> Western blot and RT-qPCR results of METTL3 in HEK293T and the isogenic <i>SETD2</i> <sup>-/-</sup> cells.                                                    | S8      |
| <b>Figure S6.</b> Western blot results of NCS-induced changes in H3K36me3 levels.                                                                                              | S9      |
| <b>Figure S7.</b> Western blot results of NCS-induced alterations in the chromatin occupancy of METTL3 and YTHDC1.                                                             | S10     |
| <b>Figure S8.</b> Western blot results of NCS-induced changes in the overall expression levels of METTL3 and YTHDC1.                                                           | S11     |
| <b>Figure S9.</b> PPI network analysis of up- and down-regulated RWE proteins in <i>SETD2</i> <sup>-/-</sup> cells.                                                            | S12     |
| <b>Figure S10.</b> LC-PRM quantification and Kaplan-Meier survival analysis of METTL14 and TRMT11.                                                                             | S13     |
| <b>Table S1.</b> LC-PRM quantification results of epitranscriptomic RWE proteins in HEK293T and the isogenic <i>SETD2</i> <sup>-/-</sup> and <i>KAT5</i> <sup>-/-</sup> cells. | S14-S86 |

## Supplementary Experimental Section

### Neocarzinostatin (NCS) treatment

HEK293T and the isogenic *SETD2*<sup>-/-</sup> cells were treated with 100 ng/ml NCS and the cells were harvested at different time points for preparing for the whole-cell lysate, chromatin fraction and histone fraction. The NCS-induced alterations in H3K36me3 in core histones, METTL3 and YTHDC1 in the chromatin fractions from HEK293T cells and the isogenic cells depleted of SETD2 were conducted in three and five biological replicates, respectively. Each biological replicate was performed on a separate day.

### Extraction of core histones

Nuclear pellet was extracted with Nuclear and Cytoplasmic Extraction Reagents (Thermo Scientific) following the manufacturer's recommended protocol. Nuclear pellet was incubated with chilled 0.4 N hydrochloric acid and vortexed at 4°C for 4 h. After centrifugation at 13,000 rpm for 30 min, the supernatant was transferred to a pre-chilled 1.5 mL tube. Half volume of 100% trichloroacetic acid was added dropwise to the supernatant. The mixture was incubated at 4°C for 30 min and then centrifuged at 13,000 rpm for 30 min. Histone pellet was washed with chilled acetone before concentration quantification by Bradford assay.

### Western blot

The same amount of total protein lysate from each sample was denatured by heating in Laemmli loading buffer (Bio-Rad) at 95°C for 10 min and then resolved using a 10% or 15% SDS-PAGE gel. The proteins were subsequently transferred from to a nitrocellulose membrane at 100 V for 1 h at 4°C. After blocking with 5% non-fat dry milk in PBS-T (PBS with 0.05% Tween 20) for 1 h, the membrane was incubated at 4°C overnight with the following antibodies: METTL14 (Proteintech, 26158-1-AP, 1:1000), METTL3 (Proteintech, 15073-1-AP, 1:1000), YTHDC1 (Proteintech, 67911-1-Ig, 1:2000), GAPDH (Santa Cruz, sc-32233, 1:2,000), SNRNP70 (Abclonal, A6065, 1:1000), H3K36me3 (Cell Signaling Technology, 9763s, 1:1000) and histone H3 (Proteintech, 17168-1-AP, 1:5000). The membranes were thoroughly washed with PBS-T three times followed by secondary antibody incubation with HRP-fused donkey anti-rabbit secondary antibody (Sigma, A0545, 1:2500) or anti-mouse secondary antibody (Santa Cruz, m-IgGκ BP-HRP, 1:2500). After thorough washing for three times, the protein signal was developed by using Amersham ECL™ Western Blot Detecting Reagent (GE Healthcare) with LI-COR Odyssey FC imaging system. Quantification of Western blot was carried out using Image Studio Lite Version 5.2.

### Real-time quantitative PCR (RT-qPCR)

Total RNA was extracted with Total RNA kit I (Omega). cDNA was generated from 2 µg of total RNA using M-MLV reverse transcriptase (Promega). RT-qPCR was performed with Luna qPCR master mixture (New England Biolabs) on CFX96 RT-qPCR detection system (Bio-Rad). The primer sequences used for qPCR are listed below:

*METTL3* Forward: 5' - CAA GGC TTC AAC CAG GGT CT - 3'

*METTL3* Reverse: 5' - GGT TTC CAA GGG TGA TCC AGT - 3'

*GAPDH* Forward: 5' - GTT CGT CAT GGG TGT GAA CC - 3'

*GAPDH* Reverse: 5' - CAT GGA CTG TGG TCA TGA GT - 3'

### **Protein-protein interaction network analysis**

The protein-protein interaction (PPI) network of up- and down-regulated RWE proteins in *SETD2*<sup>-/-</sup> cell was constructed using STRING (<https://string-db.org>)<sup>1</sup>. Cytoscape software 3.9.1<sup>2</sup> was used to visualize the PPI network. Cytoscape plug-in cytoHubba was used to recognize the top 10 hub proteins with the Maximal Clique Centrality (MCC) method<sup>3</sup>. Visualization of the PPI network with enrichment annotations was further processed in Cytoscape 3.9.1. Kaplan-Meier survival analysis was performed with the OncoLnc webtool<sup>4</sup> based on TCGA data (<https://www.cancer.gov/tcga>).

### **References:**

1. Szklarczyk, D.; Gable, A. L.; Lyon, D.; Junge, A.; Wyder, S.; Huerta-Cepas, J.; Simonovic, M.; Doncheva, N. T.; Morris, J. H.; Bork, P.; Jensen, L. J.; Mering, Christian v., STRING v11: protein-protein association networks with increased coverage, supporting functional discovery in genome-wide experimental datasets. *Nucleic Acids Res.* **2019**, *47*, D607-D613.
2. Shannon, P.; Markiel, A.; Ozier, O.; Baliga, N. S.; Wang, J. T.; Ramage, D.; Amin, N.; Schwikowski, B.; Ideker, T., Cytoscape: a software environment for integrated models of biomolecular interaction networks. *Genome Res.* **2003**, *13*, 2498-504.
3. Chin, C.-H.; Chen, S.-H.; Wu, H.-H.; Ho, C.-W.; Ko, M.-T.; Lin, C.-Y., cytoHubba: identifying hub objects and sub-networks from complex interactome. *BMC Syst. Biol.* **2014**, *8*, S11.
4. Anaya, J., OncoLnc: linking TCGA survival data to mRNAs, miRNAs, and lncRNAs. *PeerJ Comput. Sci.* **2016**, *2*, e67.

**Figure S1. Western blot validation of chromatin fractionation.** GAPDH, SNRNP70 (small nuclear ribonucleoprotein 70), and histone H3 were used as markers for the cytoplasm, nucleoplasm, and chromatin fractions, respectively.

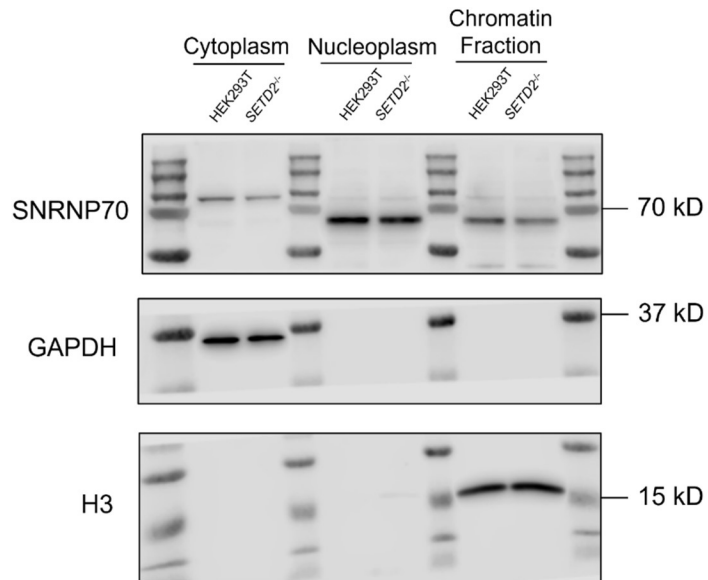

**Figure S2. Comparison of the LC-PRM quantification results for RWE proteins in the chromatin fractions of *SETD2*<sup>-/-</sup> (n = 3) and *KAT5*<sup>-/-</sup> (n = 3) cells relative to parental HEK293T cells (n = 3).** (a) A Venn diagram illustrating the numbers of RWE proteins quantified in the chromatin fractions of *SETD2*<sup>-/-</sup> (n = 3) and *KAT5*<sup>-/-</sup> (n = 3) cells and in the PRM library. (b) A Venn diagram depicting the numbers of up- and down-regulated RWE proteins in the chromatin fractions of *SETD2*<sup>-/-</sup> and *KAT5*<sup>-/-</sup> cells. Proteins with expression fold changes being greater than 1.5 and lower than 0.67 were considered up- and down-regulated, respectively.

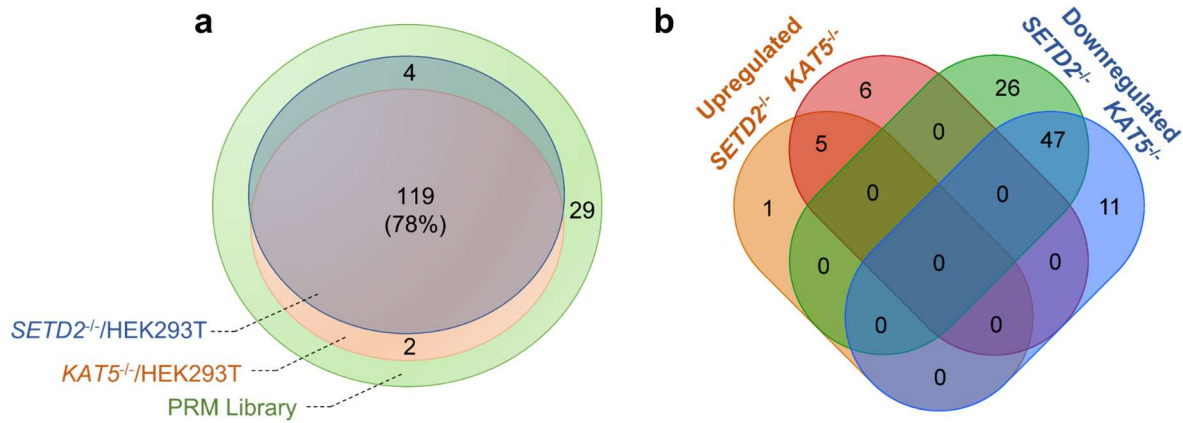

**Figure S3. Bar charts showing the overall expression levels of RWE proteins down-regulated in the chromatin fraction.** (a&d) RWE proteins down-regulated in chromatin fractions but up-regulated in the whole-cell lysates of *SETD2*<sup>-/-</sup> (a) and *KAT5*<sup>-/-</sup> (d) cells. (b&e) RWE proteins down-regulated in the chromatin fractions but unchanged in the whole-cell lysates of *SETD2*<sup>-/-</sup> (b) and *KAT5*<sup>-/-</sup> (e) cells. (c&f) RWE proteins down-regulated in both the chromatin fraction and whole-cell lysate of *SETD2*<sup>-/-</sup> (c) and *KAT5*<sup>-/-</sup> (f) cells. The quantification results displayed in (a-f) represent the mean and S.D. of results obtained from three independent biological replicates conducted on 3 separate days.

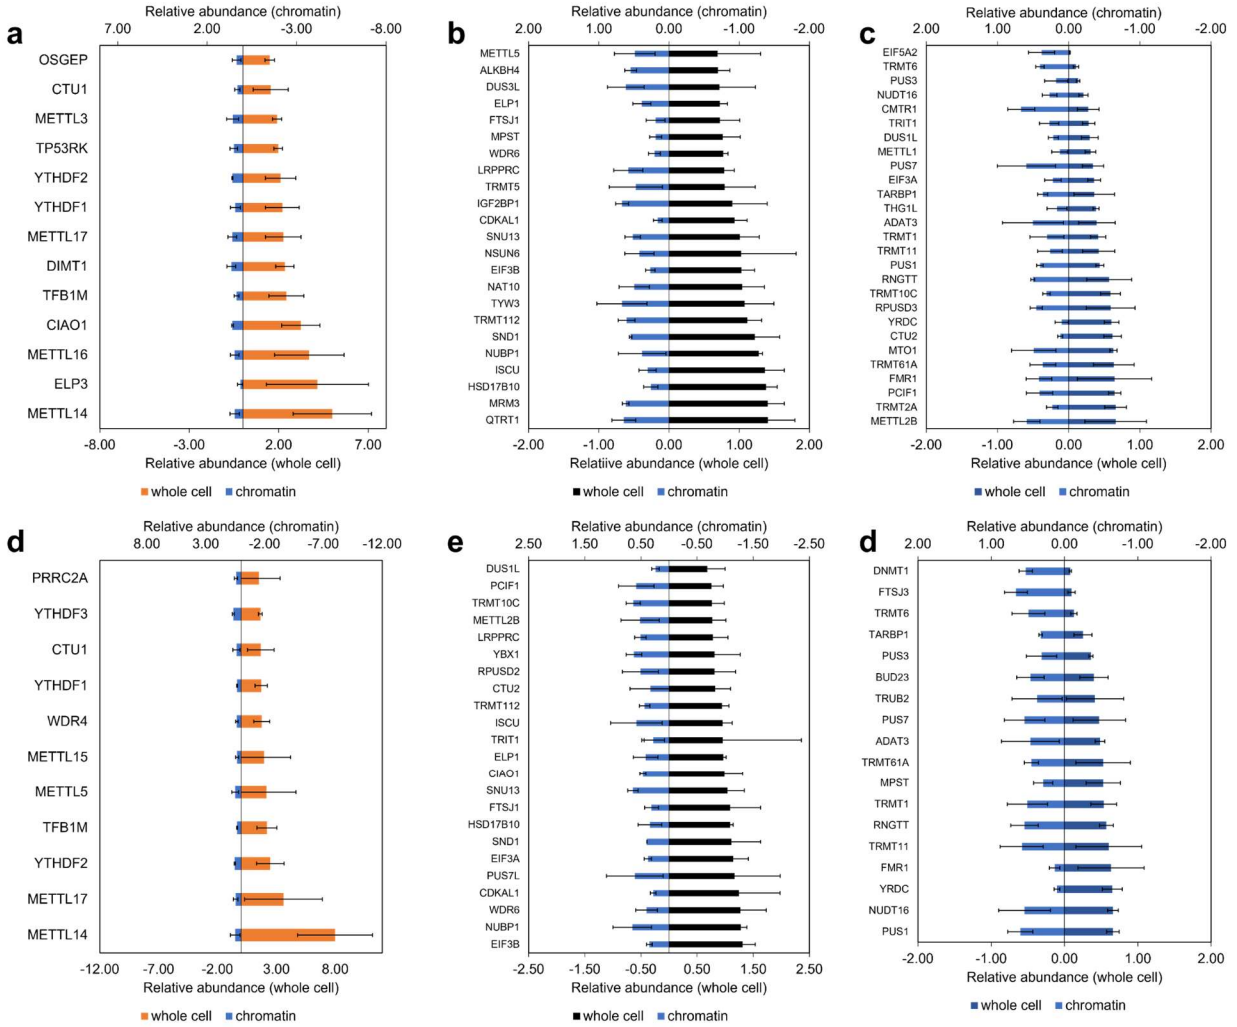

**Figure S4. Extracted-ion chromatograms of tryptic peptides from METTL3, METTL14, and YTHDC1, and their corresponding SIL peptides.** (a-c) Extracted-ion chromatograms of tryptic peptides LEIDEIAAPR (from METTL14, a), NPEAALSPTFR (from METTL3, b), GVWSTLPVNEK (from YTHDC1, c) and their corresponding SIL peptides showing the elevated overall expressions of METTL3 and METTL14, diminished overall expression of YTHDC1, attenuated chromatin occupancy of METTL3 and METTL14, and no change in chromatin occupancy of YTHDC1 in *SETD2*<sup>-/-</sup> and *KAT5*<sup>-/-</sup> cells relative to the parental HEK293T cells.

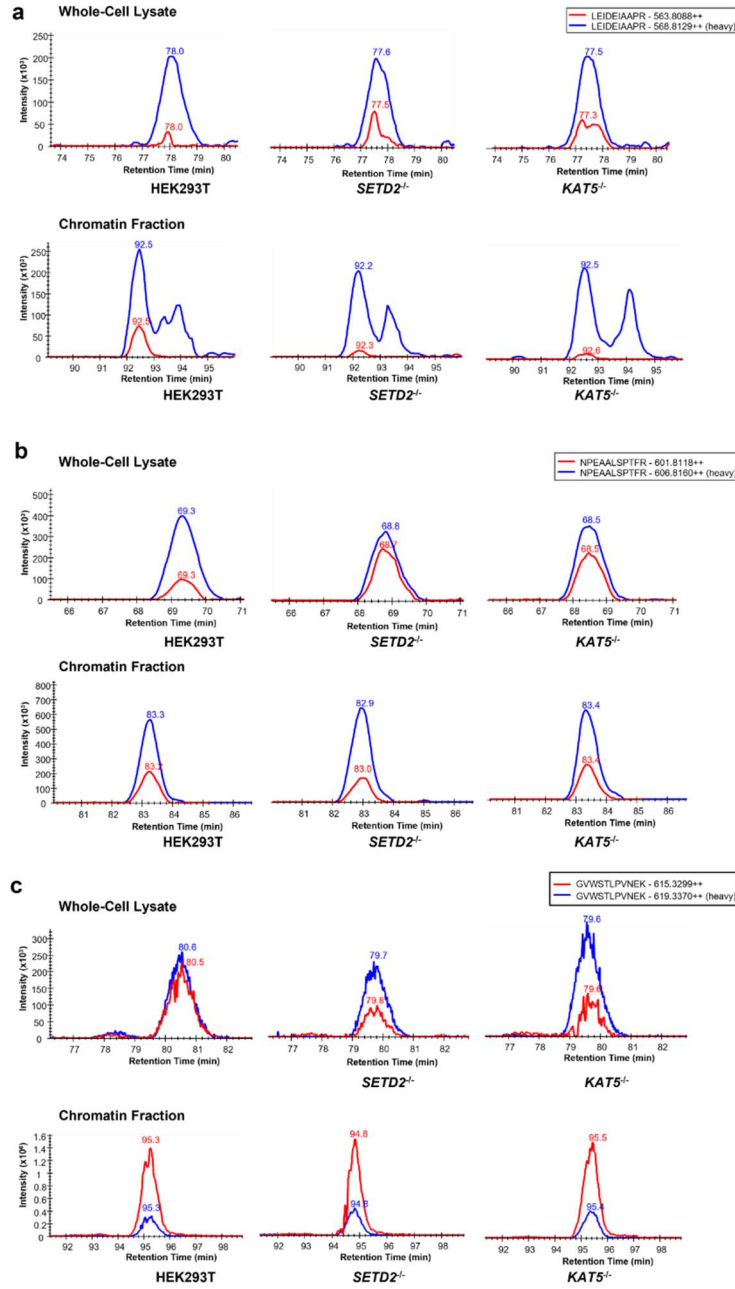

**Figure S5. Western blot and RT-qPCR results for monitoring the expression levels of METTL3 protein and mRNA in HEK293T and the isogenic *SETD2*<sup>-/-</sup> cells.** (a&b) Western blot image and quantification results of METTL3 protein in the chromatin fractions of HEK293T and the isogenic *SETD2*<sup>-/-</sup> cells (n = 3). Histone H3 was employed as a loading control, and GAPDH was monitored to indicate the lack of contamination of cytoplasmic proteins in the chromatin fraction. (c) RT-qPCR showing the mRNA expression levels of *METTL3* in HEK293T and the isogenic *SETD2*<sup>-/-</sup> cells.

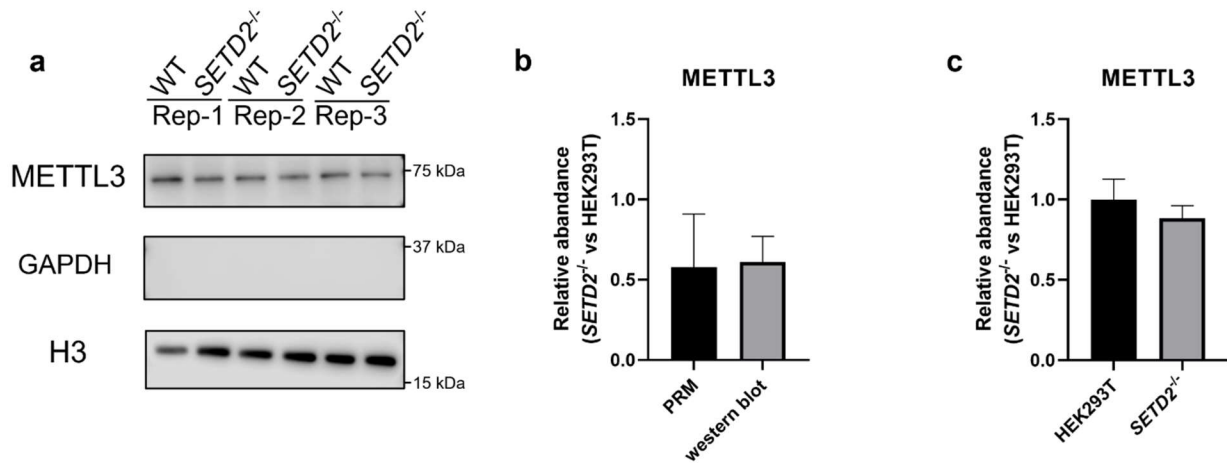



**Figure S6. Western blot results showing the NCS-induced changes in H3K36me3 levels.** Western blot results of H3K36me3 in the core histones extracted from HEK293T and the isogenic *SETD2*<sup>-/-</sup> cells during the time course of treatment with 100 ng/mL NCS. Histone H3 was employed as a loading control. The western blot results were obtained from three independent biological replicates on three different days.

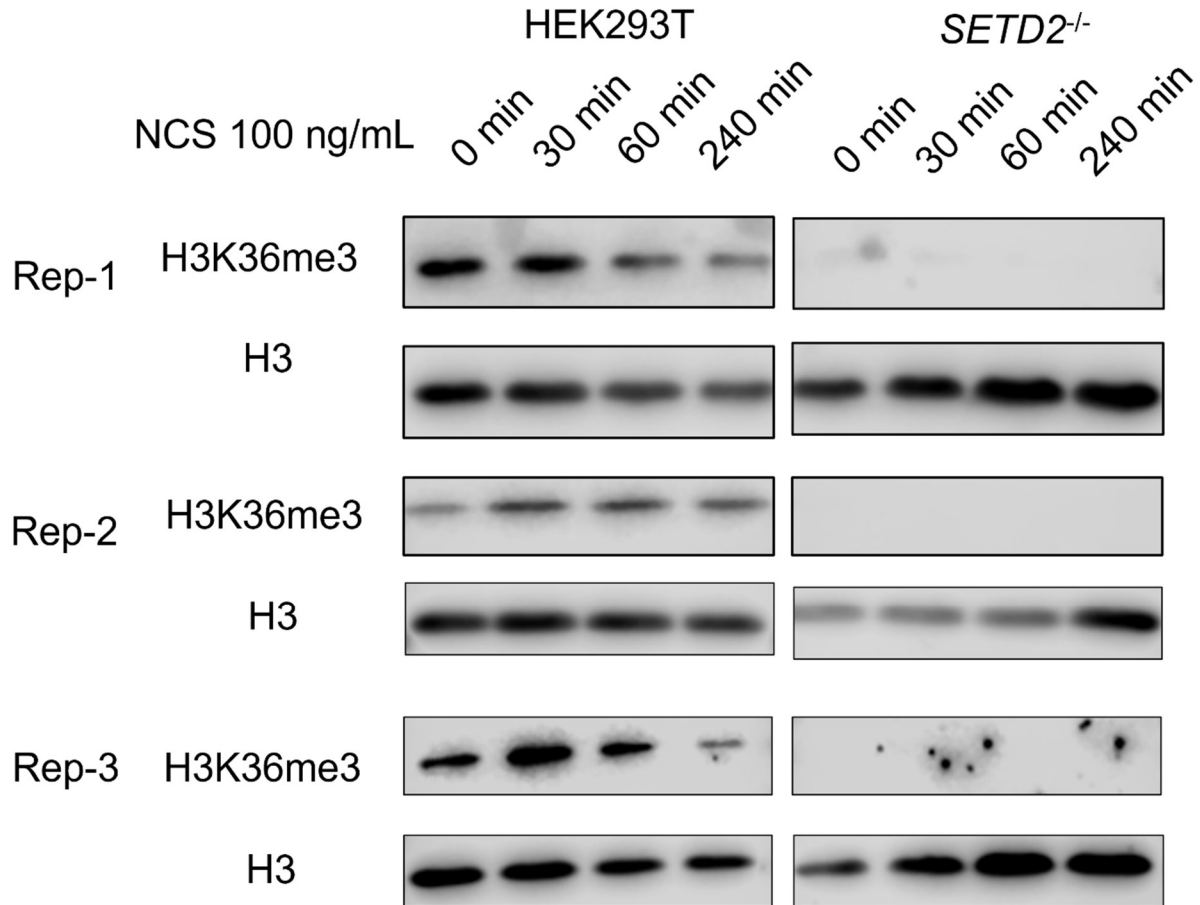

**Figure S7. Western blot results of NCS-induced alterations in the chromatin occupancy of METTL3 and YTHDC1.** Western blot results of METTL3 and YTHDC1 proteins in the chromatin fractions of HEK293T and the isogenic *SETD2*<sup>-/-</sup> cells at different time points following treatment with 100 ng/mL NCS. Histone H3 was employed as a loading control, and GAPDH was monitored to indicate the lack of contamination of cytoplasmic proteins in the chromatin fraction. The Western blot results were obtained from five independent biological replicates on different days.

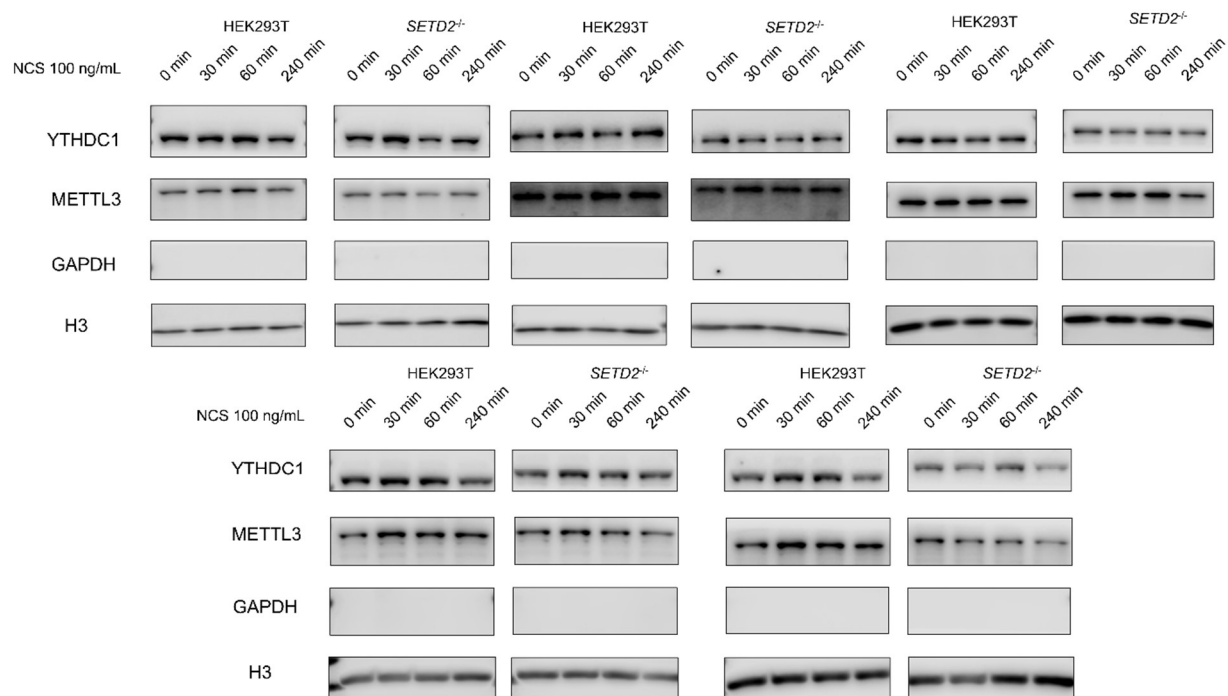

**Figure S8. Western blot results for assessing the overall expression levels of METTL3 and YTHDC1 at different time points following NCS treatment.** (a) Western blot results of METTL3 and YTHDC1 proteins in the whole-cell lysates of HEK293T and the isogenic *SETD2*<sup>-/-</sup> cells at different time points after treatment with 100 ng/mL NCS. GAPDH was employed as a loading control. (b) Western blot quantification results showing the NCS-induced changes in the levels of METTL3 and YTHDC1 proteins in the whole-cell lysates of HEK293T and the isogenic *SETD2*<sup>-/-</sup> cells. The quantification results displayed in (b) represent the mean and S.D. of results obtained from three independent biological replicates conducted on separate days.

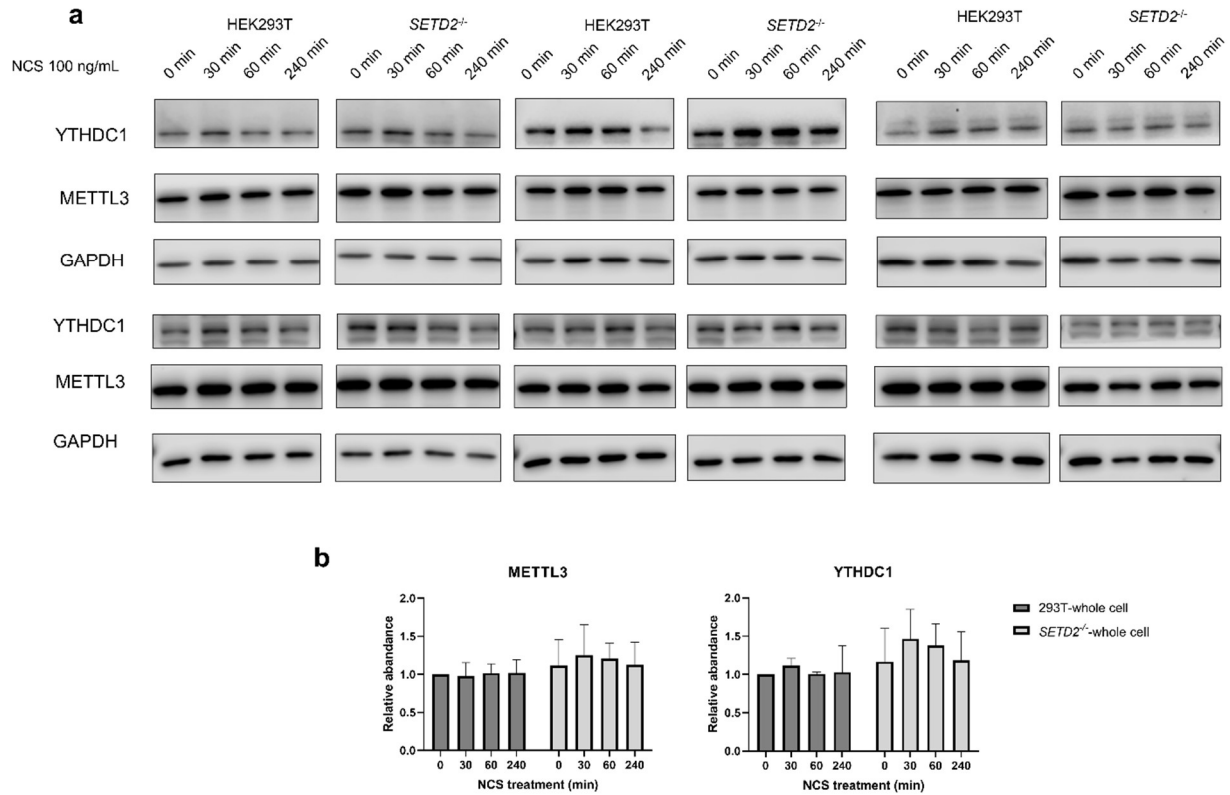

**Figure S9. Protein-protein interaction (PPI) network analysis of up- and down-regulated epitranscriptomic RWE proteins in *SETD2*<sup>-/-</sup> cells.** (a&c) PPI network of the up- (a) and down-regulated (c) epitranscriptomic RWE proteins in *SETD2*<sup>-/-</sup> cells relative to parental HEK293T cells using the STRING database. (b&d) Top 6 (b) and 10 (d) hub proteins in the PPI networks of up- and down-regulated RWE proteins identified by Cytoscape plugin cytoHubba with the Maximal Clique Centrality (MCC) methods, respectively. A color scale ranging from red to yellow represents the importance of hub proteins from the most important to less important.

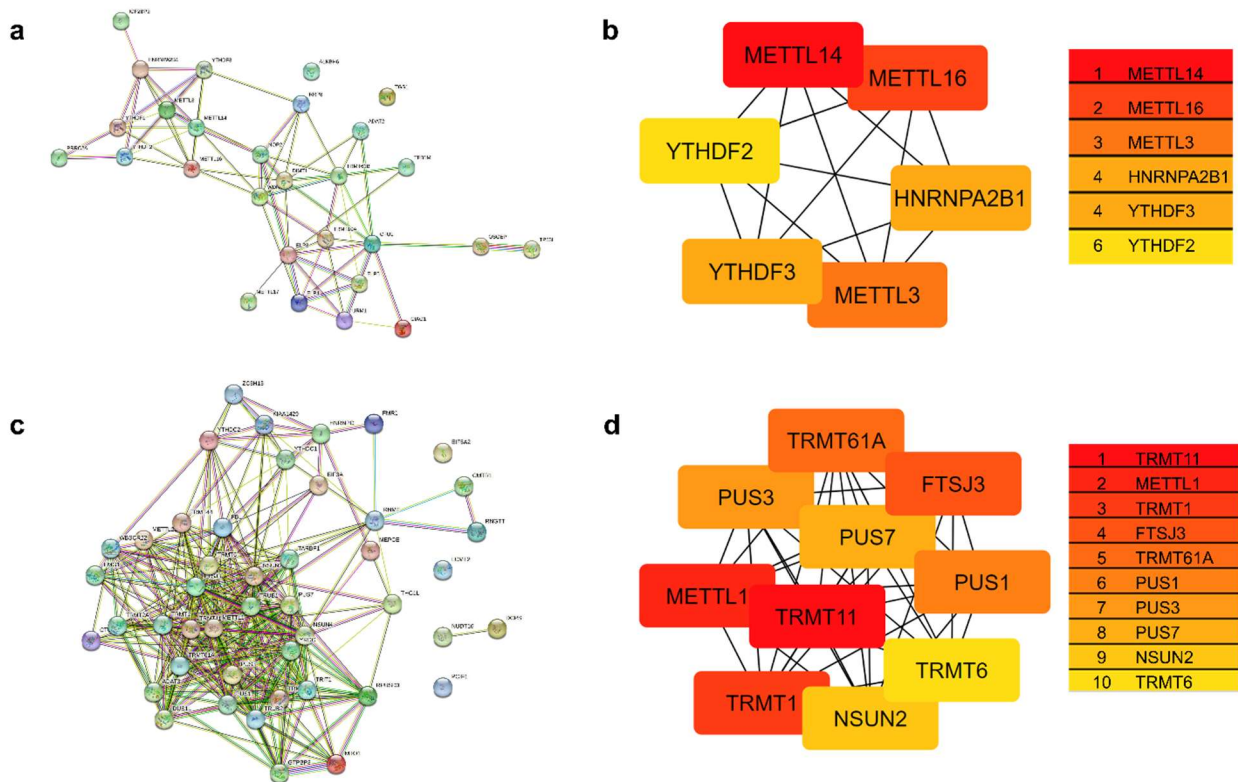

**Figure S10. LC-PRM quantification and Kaplan-Meier survival analysis of METTL14 and TRMT11.** (a) Extracted-ion chromatograms (EICs) of tryptic peptides LEIDEIAAPR (from METTL14) and its corresponding SIL peptide. (b) Kaplan-Meier survival analysis for KIRC in TCGA showing that higher METTL14 expression is associated with better prognosis in KIRC. (c) EICs of tryptic peptides IDALEFLPFEGK (from TRMT11) and its corresponding surrogate standard peptide (VLLATLSIPITPER\*, where R\* designates [<sup>13</sup>C<sub>6</sub>,<sup>15</sup>N<sub>4</sub>]-arginine). (d) Kaplan-Meier survival analysis for KIRC in TCGA showing lower TRMT11 expression is associated with better prognosis in KIRC.

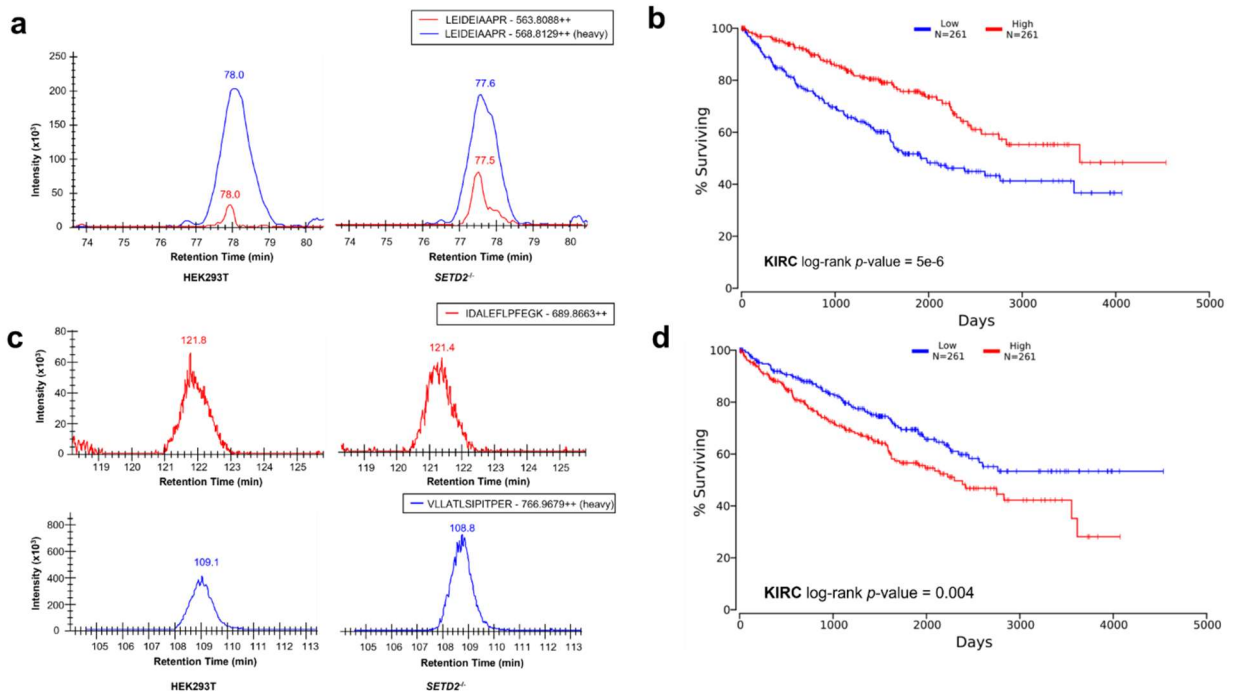

**Table S1a. A comparison of the LC-PRM quantification results of RWE proteins in chromatin fraction and whole-cell lysate of *SETD2*<sup>-/-</sup> cells (n = 3) relative parental HEK293T cells (n=3).**

|          | SETD2_KO/HEK293T  |                   |                   |      |      |        | one samples t test | SETD2_KO/HEK293T |               |               |      |      |        | one samples t test |
|----------|-------------------|-------------------|-------------------|------|------|--------|--------------------|------------------|---------------|---------------|------|------|--------|--------------------|
|          | chromatin-ratio-1 | chromatin-ratio-2 | chromatin-ratio-3 | Ave. | S.D. | R.S.D. | p-value            | wholec-cell-1    | wholec-cell-2 | wholec-cell-3 | Ave. | S.D. | R.S.D. | p-value            |
| ADAR     | 0.61              | 0.69              | 0.99              | 0.76 | 0.20 | 26%    | 0.179              | 0.98             | 0.84          | 0.65          | 0.83 | 0.16 | 20%    | 0.208              |
| ADAT1    | 1.91              | 5.14              | 5.58              | 4.21 | 2.01 | 48%    | 0.109              |                  |               |               |      |      |        |                    |
| ADAT3    | 1.00              | 0.24              | 0.27              | 0.50 | 0.43 | 85%    | 0.182              | 0.44             | 0.12          | 0.62          | 0.39 | 0.26 | 65%    | 0.055              |
| BUD23    | 0.46              | 0.80              | 0.94              | 0.73 | 0.25 | 34%    | 0.199              | 0.20             | 0.09          | 0.20          | 0.16 | 0.07 | 40%    | 0.002              |
| CDK5RAP1 | 0.41              | 0.95              | 0.51              | 0.62 | 0.28 | 46%    | 0.149              |                  |               |               |      |      |        |                    |
| CDKAL1   | 0.15              | 0.11              | 0.23              | 0.16 | 0.06 | 38%    | 0.002              | 1.13             | 0.89          | 0.77          | 0.93 | 0.18 | 19%    | 0.585              |
| CMTR1    | 0.89              | 0.54              | 0.58              | 0.67 | 0.19 | 29%    | 0.095              | 0.31             | 0.11          | 0.40          | 0.27 | 0.15 | 56%    | 0.014              |
| APOBEC3G | 1.06              | 1.05              | 1.44              | 1.19 | 0.22 | 19%    | 0.282              |                  |               |               |      |      |        |                    |
| CMTR2    | 0.10              | 0.15              | 0.24              | 0.16 | 0.07 | 46%    | 0.003              |                  |               |               |      |      |        |                    |
| CTU1     | 0.48              | 0.21              | 0.24              | 0.31 | 0.15 | 48%    | 0.015              | 2.63             | 1.33          | 0.70          | 1.55 | 0.98 | 63%    | 0.434              |
| CTU2     | 0.16              | 0.11              | 0.09              | 0.12 | 0.03 | 29%    | 0.001              | 0.72             | 0.65          | 0.48          | 0.62 | 0.12 | 20%    | 0.032              |
| DCP2     | 0.64              | 0.35              | 0.15              | 0.38 | 0.24 | 64%    | 0.048              |                  |               |               |      |      |        |                    |
| DIMT1    | 0.87              | 0.71              | 0.38              | 0.65 | 0.25 | 38%    | 0.136              | 2.56             | 2.70          | 1.76          | 2.34 | 0.51 | 22%    | 0.045              |
| DUS1L    | 0.29              | 0.22              | 0.15              | 0.22 | 0.07 | 33%    | 0.003              | 0.23             | 0.43          | 0.23          | 0.30 | 0.12 | 39%    | 0.009              |
| DUS3L    | 0.32              | 0.69              | 0.83              | 0.62 | 0.26 | 43%    | 0.126              | 1.28             | 0.26          | 0.61          | 0.72 | 0.52 | 72%    | 0.444              |
| EIF5A2   | 0.59              | 0.29              | 0.26              | 0.38 | 0.18 | 48%    | 0.028              | 0.02             | 0.02          | 0.02          | 0.02 | 0.00 | 15%    | 0.000              |
| ELP1     | 0.51              | 0.41              | 0.25              | 0.39 | 0.13 | 34%    | 0.015              | 0.77             | 0.60          | 0.80          | 0.72 | 0.11 | 15%    | 0.050              |
| ELP3     | 0.32              | 0.08              | 0.04              | 0.15 | 0.15 | 101%   | 0.010              | 4.42             | 6.88          | 1.18          | 4.16 | 2.86 | 69%    | 0.195              |
| EMG1     | 0.88              | 0.78              | 0.98              | 0.88 | 0.10 | 11%    | 0.168              | 0.76             | 0.60          | 0.59          | 0.65 | 0.09 | 14%    | 0.022              |
| FBL      | 0.87              | 1.20              | 1.72              | 1.26 | 0.43 | 34%    | 0.403              | 0.82             | 0.29          | 0.54          | 0.55 | 0.26 | 48%    | 0.097              |
| FTSJ1    | 0.34              | 0.12              | 0.11              | 0.19 | 0.13 | 70%    | 0.009              | 1.03             | 0.48          | 0.67          | 0.73 | 0.28 | 39%    | 0.235              |
| HSD17B10 | 0.37              | 0.17              | 0.23              | 0.26 | 0.10 | 39%    | 0.006              | 1.40             | 1.53          | 1.21          | 1.38 | 0.16 | 11%    | 0.053              |
| LCMT2    | 1.39              | 0.63              | 0.42              | 0.81 | 0.51 | 63%    | 0.585              | 0.76             | 0.18          | 0.89          | 0.61 | 0.38 | 62%    | 0.214              |
| MEPCE    | 1.02              | 0.97              | 0.60              | 0.87 | 0.23 | 27%    | 0.420              | 1.03             | 0.46          | 0.34          | 0.61 | 0.37 | 60%    | 0.209              |

|         |      |      |      |      |      |     |       |      |      |      |      |      |     |       |
|---------|------|------|------|------|------|-----|-------|------|------|------|------|------|-----|-------|
| MRM1    | 1.12 | 1.28 | 1.95 | 1.45 | 0.44 | 30% | 0.218 |      |      |      |      |      |     |       |
| MRM2    | 1.58 | 0.25 | 0.69 | 0.84 | 0.68 | 80% | 0.725 | 0.96 | 0.56 | 0.72 | 0.75 | 0.20 | 27% | 0.166 |
| MRM3    | 0.64 | 0.56 | 0.65 | 0.62 | 0.05 | 8%  | 0.005 | 1.67 | 1.22 | 1.32 | 1.41 | 0.24 | 17% | 0.097 |
| MTO1    | 0.83 | 0.23 | 0.41 | 0.49 | 0.31 | 63% | 0.105 | 0.68 | 0.58 | 0.62 | 0.63 | 0.05 | 8%  | 0.006 |
| NAT10   | 0.72 | 0.47 | 0.29 | 0.50 | 0.22 | 44% | 0.056 | 1.16 | 1.28 | 0.69 | 1.04 | 0.31 | 30% | 0.840 |
| NFS1    | 0.99 | 0.53 | 0.67 | 0.73 | 0.23 | 32% | 0.182 | 1.49 | 0.49 | 1.06 | 1.01 | 0.50 | 50% | 0.964 |
| NOP2    | 1.45 | 2.32 | 2.77 | 2.18 | 0.67 | 31% | 0.093 | 1.85 | 1.90 | 2.48 | 2.08 | 0.35 | 17% | 0.034 |
| NUDT16  | 0.38 | 0.17 | 0.26 | 0.27 | 0.10 | 38% | 0.007 | 0.27 | 0.15 | 0.20 | 0.21 | 0.06 | 30% | 0.002 |
| PCIF1   | 0.62 | 0.33 | 0.28 | 0.41 | 0.18 | 45% | 0.031 | 0.71 | 0.55 | 0.68 | 0.65 | 0.09 | 13% | 0.019 |
| QTRT1   | 0.82 | 0.48 | 0.64 | 0.64 | 0.17 | 26% | 0.069 | 1.77 | 1.00 | 1.46 | 1.41 | 0.38 | 27% | 0.207 |
| RNGTT   | 0.53 | 0.50 | 0.48 | 0.51 | 0.03 | 5%  | 0.001 | 0.79 | 0.21 | 0.72 | 0.57 | 0.32 | 55% | 0.143 |
| RNMT    | 1.11 | 0.50 | 0.78 | 0.80 | 0.30 | 38% | 0.364 | 0.45 | 0.53 | 0.49 | 0.49 | 0.04 | 8%  | 0.002 |
| RPUSD3  | 0.36 | 0.51 | 0.49 | 0.46 | 0.09 | 19% | 0.008 | 0.97 | 0.30 | 0.50 | 0.59 | 0.34 | 58% | 0.173 |
| RPUSD4  | 0.81 | 0.92 | 0.73 | 0.82 | 0.10 | 12% | 0.085 |      |      |      |      |      |     |       |
| TARBP1  | 0.35 | 0.44 | 0.30 | 0.36 | 0.07 | 19% | 0.004 | 0.68 | 0.13 | 0.27 | 0.36 | 0.28 | 79% | 0.060 |
| TFB1M   | 0.30 | 0.52 | 0.26 | 0.36 | 0.14 | 39% | 0.015 | 2.77 | 3.19 | 1.33 | 2.43 | 0.98 | 40% | 0.127 |
| TGS1    | 0.31 | 0.62 | 1.12 | 0.68 | 0.41 | 60% | 0.311 | 4.80 | 0.00 | 2.02 | 3.41 | 1.97 | 58% | 0.000 |
| THG1L   | 0.31 | 0.15 | 0.03 | 0.16 | 0.14 | 86% | 0.009 | 0.35 | 0.00 | 0.41 | 0.38 | 0.04 | 11% | 0.000 |
| THUMPD1 | 1.71 | 0.16 | 0.82 | 0.90 | 0.78 | 86% | 0.841 | 1.28 | 1.00 | 1.29 | 1.19 | 0.17 | 14% | 0.188 |
| TRIT1   | 0.13 | 0.41 | 0.28 | 0.27 | 0.14 | 50% | 0.012 | 0.23 | 0.38 | 0.23 | 0.28 | 0.09 | 31% | 0.005 |
| TRMT1   | 0.58 | 0.23 | 0.12 | 0.31 | 0.24 | 78% | 0.038 | 0.43 | 0.30 | 0.51 | 0.41 | 0.11 | 26% | 0.011 |
| TRMT10C | 0.30 | 0.37 | 0.27 | 0.31 | 0.05 | 16% | 0.002 | 0.52 | 0.75 | 0.49 | 0.59 | 0.14 | 24% | 0.037 |
| TRMT11  | 0.20 | 0.13 | 0.46 | 0.26 | 0.17 | 66% | 0.018 | 0.40 | 0.21 | 0.66 | 0.42 | 0.23 | 53% | 0.047 |
| TRMT112 | 0.47 | 0.65 | 0.69 | 0.61 | 0.12 | 20% | 0.029 | 1.11 | 1.32 | 0.91 | 1.11 | 0.20 | 18% | 0.436 |
| TRMT2A  | 0.32 | 0.19 | 0.18 | 0.23 | 0.08 | 34% | 0.004 | 0.54 | 0.83 | 0.61 | 0.66 | 0.15 | 23% | 0.059 |
| TRMT5   | 0.91 | 0.27 | 0.23 | 0.47 | 0.38 | 80% | 0.137 | 1.13 | 0.30 | 0.94 | 0.79 | 0.44 | 55% | 0.497 |
| TRUB2   | 0.75 | 0.91 | 1.20 | 0.95 | 0.23 | 24% | 0.756 | 0.73 | 0.11 | 0.47 | 0.44 | 0.31 | 71% | 0.090 |
| TYW3    | 1.07 | 0.38 | 0.56 | 0.67 | 0.36 | 53% | 0.250 | 1.56 | 0.82 | 0.86 | 1.08 | 0.42 | 39% | 0.777 |
| WDR4    | 1.57 | 0.56 | 0.40 | 0.84 | 0.63 | 75% | 0.709 | 2.83 | 1.54 | 1.53 | 1.97 | 0.75 | 38% | 0.154 |

|         |      |      |      |      |      |     |       |      |      |      |      |      |     |       |
|---------|------|------|------|------|------|-----|-------|------|------|------|------|------|-----|-------|
| YBX1    | 0.81 | 0.94 | 0.50 | 0.75 | 0.22 | 30% | 0.192 | 0.89 | 0.48 | 1.25 | 0.87 | 0.39 | 44% | 0.628 |
| RBMX    | 0.95 | 1.27 | 1.46 | 1.23 | 0.26 | 21% | 0.264 | 1.48 | 0.59 | 1.04 | 1.03 | 0.44 | 43% | 0.906 |
| ELAVL1  | 0.82 | 1.09 | 0.93 | 0.95 | 0.13 | 14% | 0.556 | 1.18 | 0.94 | 1.08 | 1.07 | 0.12 | 11% | 0.429 |
| SND1    | 0.53 | 0.56 | 0.56 | 0.55 | 0.02 | 3%  | 0.001 | 1.63 | 1.05 | 0.99 | 1.22 | 0.35 | 29% | 0.390 |
| FMR1    | 0.60 | 0.41 | 0.24 | 0.42 | 0.18 | 43% | 0.030 | 0.61 | 0.14 | 1.18 | 0.64 | 0.52 | 81% | 0.360 |
| LRPPRC  | 0.55 | 0.80 | 0.39 | 0.58 | 0.21 | 36% | 0.073 | 0.73 | 0.95 | 0.67 | 0.78 | 0.15 | 19% | 0.126 |
| PUS7L   | 1.23 | 0.39 | 1.11 | 0.91 | 0.46 | 50% | 0.770 | 1.23 | 0.63 | 0.61 | 0.83 | 0.35 | 43% | 0.482 |
| ALKBH2  | 0.23 | 0.06 | 0.09 | 0.13 | 0.09 | 72% | 0.004 |      |      |      |      |      |     |       |
| ALKBH3  | 1.05 | 0.40 | 0.26 | 0.57 | 0.42 | 74% | 0.222 |      |      |      |      |      |     |       |
| ALKBH4  | 0.64 | 0.50 | 0.49 | 0.55 | 0.08 | 15% | 0.011 | 0.68 | 0.54 | 0.88 | 0.70 | 0.17 | 25% | 0.093 |
| ALKBH5  | 1.18 | 1.00 | 1.11 | 1.10 | 0.10 | 9%  | 0.217 | 1.18 | 0.97 | 0.88 | 1.01 | 0.16 | 15% | 0.905 |
| FTO     | 0.62 |      | 0.76 | 0.69 | 0.10 | 15% |       | 0.90 | 0.94 | 0.77 | 0.87 | 0.09 | 11% | 0.138 |
| YTHDF1  | 0.72 | 0.40 | 0.17 | 0.43 | 0.28 | 65% | 0.071 | 2.96 | 1.14 | 2.50 | 2.20 | 0.95 | 43% | 0.159 |
| YTHDF2  | 0.63 | 0.58 | 0.58 | 0.60 | 0.03 | 5%  | 0.002 | 2.85 | 1.17 | 2.27 | 2.10 | 0.85 | 41% | 0.155 |
| YTHDF3  | 1.02 | 0.74 | 0.76 | 0.84 | 0.16 | 19% | 0.221 | 2.10 | 1.28 | 1.44 | 1.61 | 0.43 | 27% | 0.137 |
| YTHDC1  | 1.16 | 0.67 | 1.11 | 0.98 | 0.27 | 28% | 0.913 | 0.35 | 0.29 | 0.34 | 0.33 | 0.03 | 9%  | 0.001 |
| YTHDC2  | 1.97 | 3.26 | 2.30 | 2.51 | 0.67 | 27% | 0.060 | 0.21 | 0.16 | 0.13 | 0.17 | 0.04 | 26% | 0.001 |
| METTL3  | 0.95 | 0.39 | 0.38 | 0.58 | 0.33 | 57% | 0.154 | 2.17 | 1.91 | 1.65 | 1.91 | 0.26 | 14% | 0.027 |
| METTL14 | 0.72 | 0.19 | 0.47 | 0.46 | 0.26 | 57% | 0.070 | 3.21 | 4.33 | 7.43 | 4.99 | 2.19 | 44% | 0.087 |
| METTL1  | 0.25 | 0.10 | 0.03 | 0.13 | 0.11 | 87% | 0.005 | 0.37 | 0.32 | 0.22 | 0.31 | 0.07 | 25% | 0.004 |
| METTL16 | 0.72 | 0.44 | 0.24 | 0.47 | 0.24 | 52% | 0.062 | 2.96 | 5.91 | 2.23 | 3.70 | 1.95 | 53% | 0.138 |
| METTL2B | 0.79 | 0.43 | 0.54 | 0.59 | 0.19 | 31% | 0.062 | 1.01 | 0.18 | 0.79 | 0.66 | 0.43 | 65% | 0.307 |
| NSUN2   | 1.18 | 0.87 | 0.92 | 0.99 | 0.17 | 17% | 0.933 | 0.58 | 0.07 | 0.41 | 0.35 | 0.26 | 74% | 0.050 |
| NSUN5   | 0.89 | 0.82 | 1.04 | 0.92 | 0.11 | 12% | 0.338 | 1.35 | 0.30 | 1.16 | 0.93 | 0.56 | 60% | 0.859 |
| NSUN6   | 0.66 | 0.25 | 0.36 | 0.42 | 0.21 | 50% | 0.041 | 1.93 | 0.60 | 0.54 | 1.03 | 0.79 | 77% | 0.961 |
| DNMT1   | 0.71 | 0.60 | 0.71 | 0.67 | 0.07 | 10% | 0.013 |      |      |      |      |      |     |       |
| TRMT61A | 0.18 | 0.55 | 0.36 | 0.36 | 0.18 | 50% | 0.027 | 0.68 | 0.90 | 0.33 | 0.63 | 0.29 | 45% | 0.159 |
| TRMT61B | 0.47 | 1.44 | 0.48 | 0.80 | 0.56 | 70% | 0.592 | 2.98 | 0.00 | 1.65 | 1.54 | 1.49 | 97% | 0.593 |
| TRMT6   | 0.34 | 0.46 | 0.41 | 0.40 | 0.06 | 14% | 0.003 | 0.09 | 0.07 | 0.14 | 0.10 | 0.04 | 36% | 0.001 |



|           |      |      |      |      |      |     |       |      |      |      |      |      |     |       |
|-----------|------|------|------|------|------|-----|-------|------|------|------|------|------|-----|-------|
| PUS7      | 1.06 | 0.43 | 0.29 | 0.59 | 0.41 | 69% | 0.228 | 0.40 | 0.45 | 0.17 | 0.34 | 0.15 | 44% | 0.017 |
| IGF2BP1   | 0.73 | 0.56 | 0.71 | 0.67 | 0.09 | 14% | 0.025 | 1.42 | 0.43 | 0.86 | 0.90 | 0.49 | 55% | 0.766 |
| IGF2BP2   | 1.34 | 0.64 | 1.08 | 1.02 | 0.36 | 35% | 0.935 | 1.13 | 0.55 | 1.00 | 0.90 | 0.30 | 34% | 0.609 |
| IGF2BP3   | 0.95 | 0.93 | 1.00 | 0.96 | 0.04 | 4%  | 0.225 | 1.77 | 1.31 | 1.60 | 1.56 | 0.23 | 15% | 0.053 |
| WTAP      | 1.48 | 0.80 | 0.83 | 1.04 | 0.39 | 37% | 0.883 | 0.83 | 0.57 | 1.04 | 0.81 | 0.23 | 29% | 0.295 |
| VIRMA     | 1.12 | 0.54 | 0.40 | 0.69 | 0.38 | 55% | 0.294 | 0.66 | 0.76 | 0.42 | 0.61 | 0.17 | 28% | 0.062 |
| RBM15B    | 1.28 | 0.98 | 2.10 | 1.46 | 0.58 | 40% | 0.307 | 1.39 | 0.85 | 0.95 | 1.07 | 0.29 | 27% | 0.732 |
| RBM15     | 1.35 | 0.48 | 0.65 | 0.83 | 0.46 | 56% | 0.585 | 0.96 | 0.71 | 0.36 | 0.68 | 0.30 | 44% | 0.204 |
| ZC3H13    | 3.99 | 1.39 | 2.50 | 2.62 | 1.30 | 50% | 0.164 | 0.06 | 0.18 | 0.12 | 0.12 | 0.06 | 47% | 0.001 |
| EIF3A     | 0.17 | 0.35 | 0.14 | 0.22 | 0.12 | 53% | 0.007 | 0.37 | 0.44 | 0.26 | 0.36 | 0.09 | 26% | 0.007 |
| EIF3B     | 0.19 | 0.32 | 0.29 | 0.27 | 0.07 | 25% | 0.003 | 1.04 | 1.21 | 0.84 | 1.03 | 0.19 | 18% | 0.797 |
| HNRNPA2B1 | 1.21 | 1.22 | 1.26 | 1.23 | 0.03 | 2%  | 0.005 | 1.43 | 1.15 | 1.97 | 1.52 | 0.41 | 27% | 0.162 |
| HNRNPC    | 1.06 | 0.91 | 0.91 | 0.96 | 0.09 | 9%  | 0.511 | 0.14 | 0.17 | 0.12 | 0.14 | 0.03 | 20% | 0.000 |
| PUS1      | 0.42 | 0.35 | 0.44 | 0.40 | 0.05 | 11% | 0.002 | 0.50 | 0.38 | 0.43 | 0.44 | 0.06 | 13% | 0.004 |
| TRUB1     | 0.99 | 0.60 | 0.45 | 0.68 | 0.28 | 41% | 0.182 | 0.35 | 0.22 | 0.12 | 0.23 | 0.11 | 48% | 0.007 |
| DKC1      | 0.95 | 1.00 | 0.93 | 0.96 | 0.04 | 4%  | 0.212 | 0.98 | 0.49 | 0.87 | 0.78 | 0.26 | 33% | 0.269 |
| NSUN4     | 0.91 | 0.79 | 0.94 | 0.88 | 0.08 | 9%  | 0.127 | 0.71 | 0.45 | 0.77 | 0.64 | 0.17 | 27% | 0.068 |
| TRDMT1    | 0.23 | 0.64 | 0.63 | 0.50 | 0.23 | 47% | 0.065 |      |      |      |      |      |     |       |
| ALYREF    | 1.80 | 0.92 | 1.82 | 1.51 | 0.51 | 34% | 0.226 | 1.17 | 0.83 | 1.28 | 1.09 | 0.24 | 22% | 0.560 |
| METTL8    | 2.31 | 1.00 | 0.62 | 1.31 | 0.89 | 68% | 0.609 |      |      |      |      |      |     |       |
| PUS3      | 0.36 | 0.09 | 0.08 | 0.18 | 0.16 | 91% | 0.013 | 0.12 | 0.12 | 0.16 | 0.13 | 0.02 | 18% | 0.000 |
| ZCCHC4    | 1.84 | 1.70 | 0.82 | 1.45 | 0.55 | 38% | 0.290 |      |      |      |      |      |     |       |
| CBLL1     | 1.64 | 0.77 | 0.91 | 1.11 | 0.47 | 42% | 0.730 | 1.84 | 0.43 | 0.89 | 1.05 | 0.72 | 68% | 0.912 |
| CIAO1     | 0.62 | 0.61 | 0.54 | 0.59 | 0.04 | 8%  | 0.004 | 2.80 | 4.45 | 2.44 | 3.23 | 1.07 | 33% | 0.069 |
| DIS3L2    | 0.51 | 1.06 | 0.46 | 0.68 | 0.33 | 49% | 0.236 | 1.97 | 1.21 | 0.82 | 1.33 | 0.58 | 43% | 0.424 |
| FTSJ3     | 1.14 | 0.95 | 0.78 | 0.96 | 0.18 | 19% | 0.714 | 0.03 | 0.06 | 0.03 | 0.04 | 0.02 | 52% | 0.000 |
| ISCU      | 0.43 | 0.29 | 0.19 | 0.30 | 0.12 | 40% | 0.010 | 1.58 | 1.05 | 1.47 | 1.37 | 0.28 | 20% | 0.151 |
| LAGE3     | 0.79 | 0.25 | 0.26 | 0.43 | 0.31 | 71% | 0.085 |      |      |      |      |      |     |       |
| METTL15   | 0.19 | 0.20 | 0.44 | 0.28 | 0.14 | 52% | 0.013 |      |      |      |      |      |     |       |

|         |      |      |      |      |      |     |       |      |      |      |      |      |     |       |
|---------|------|------|------|------|------|-----|-------|------|------|------|------|------|-----|-------|
| METTL17 | 0.87 | 0.38 | 0.53 | 0.59 | 0.25 | 42% | 0.105 | 1.36 | 2.07 | 3.32 | 2.25 | 0.99 | 44% | 0.160 |
| METTL5  | 0.82 | 0.30 | 0.34 | 0.49 | 0.29 | 59% | 0.092 | 1.24 | 0.03 | 0.81 | 0.69 | 0.61 | 88% | 0.477 |
| MPST    | 0.28 | 0.12 | 0.17 | 0.19 | 0.09 | 45% | 0.004 | 0.90 | 0.91 | 0.48 | 0.77 | 0.25 | 32% | 0.242 |
| SNU13   | 0.65 | 0.46 | 0.45 | 0.52 | 0.11 | 21% | 0.017 | 0.78 | 1.32 | 0.93 | 1.01 | 0.28 | 28% | 0.961 |
| NUBP1   | 0.77 | 0.20 | 0.18 | 0.38 | 0.34 | 88% | 0.087 | 1.25 | 1.34 | 1.24 | 1.28 | 0.05 | 4%  | 0.012 |
| OSGEP   | 0.63 | 0.20 | 0.22 | 0.35 | 0.24 | 69% | 0.044 | 1.60 | 1.71 | 1.19 | 1.50 | 0.27 | 18% | 0.087 |
| PRRC2A  | 1.17 | 1.14 | 0.42 | 0.91 | 0.43 | 47% | 0.750 | 3.93 | 6.33 | 4.89 | 5.05 | 1.21 | 24% | 0.028 |
| TP53RK  | 0.74 | 0.34 | 0.43 | 0.50 | 0.21 | 42% | 0.056 | 1.69 | 2.11 | 2.11 | 1.97 | 0.24 | 12% | 0.020 |
| TPRKB   | 0.15 | 0.32 | 0.37 | 0.28 | 0.12 | 42% | 0.009 |      |      |      |      |      |     |       |
| TUT7    | 3.65 | 1.56 | 4.23 | 3.15 | 1.40 | 45% | 0.118 |      |      |      |      |      |     |       |
| WDR6    | 0.26 | 0.25 | 0.11 | 0.21 | 0.09 | 41% | 0.004 | 0.85 | 0.71 | 0.76 | 0.77 | 0.07 | 9%  | 0.029 |
| YRDC    | 0.20 | 0.04 | 0.05 | 0.10 | 0.09 | 96% | 0.003 | 0.68 | 0.64 | 0.49 | 0.60 | 0.10 | 17% | 0.022 |

**Table S1b. A comparison of the LC-PRM quantification results of RWE proteins in chromatin fraction and whole-cell lysate of *KAT5*<sup>-/-</sup> cells (n = 3) relative parental HEK293T cells (n=3).**

|          | KAT5_KO/HEK293T   |                   |                   |      |      |        | one samples t test | KAT5_KO/HEK293T |               |               |      |      |        | one samples t test |
|----------|-------------------|-------------------|-------------------|------|------|--------|--------------------|-----------------|---------------|---------------|------|------|--------|--------------------|
|          | chromatin-ratio-1 | chromatin-ratio-2 | chromatin-ratio-3 | Ave. | S.D. | R.S.D. | p-value            | wholec-cell-1   | wholec-cell-2 | wholec-cell-3 | Ave. | S.D. | R.S.D. | p-value            |
| ADAR     | 0.95              | 0.74              | 1.08              | 0.93 | 0.17 | 18%    | 0.535              | 1.95            | 0.84          | 1.51          | 1.43 | 0.56 | 39%    | 0.312              |
| ADAT1    | 1.82              | 4.08              | 2.37              | 2.76 | 1.18 | 43%    | 0.123              |                 |               |               |      |      |        |                    |
| ADAT3    | 0.90              | 0.38              | 0.12              | 0.47 | 0.40 | 85%    | 0.145              | 0.56            | 0.43          | 0.46          | 0.48 | 0.07 | 14%    | 0.006              |
| BUD23    | 0.30              | 0.44              | 0.66              | 0.46 | 0.19 | 40%    | 0.038              | 0.63            | 0.29          | 0.30          | 0.40 | 0.19 | 48%    | 0.033              |
| CDK5RAP1 | 0.78              | 2.17              | 0.47              | 1.14 | 0.91 | 79%    | 0.812              | 4.20            | 1.46          | 0.66          | 2.11 | 1.86 | 88%    | 0.411              |
| CDKAL1   | 0.32              | 0.30              | 0.23              | 0.28 | 0.05 | 18%    | 0.002              | 2.09            | 0.86          | 0.78          | 1.24 | 0.73 | 59%    | 0.623              |
| CMTR1    | 1.29              | 0.50              | 0.63              | 0.81 | 0.42 | 52%    | 0.514              | 0.66            | 0.30          | 0.66          | 0.54 | 0.21 | 38%    | 0.061              |
| APOBEC3G | 0.92              | 0.78              | 0.94              | 0.88 | 0.09 | 10%    | 0.137              |                 |               |               |      |      |        |                    |
| CMTR2    | 0.08              | 0.12              | 0.26              | 0.16 | 0.09 | 59%    | 0.004              |                 |               |               |      |      |        |                    |
| CTU1     | 0.31              | 0.71              | 0.12              | 0.38 | 0.30 | 79%    | 0.071              | 2.55            | 2.10          | 0.38          | 1.68 | 1.14 | 68%    | 0.412              |
| CTU2     | 0.75              | 0.18              | 0.07              | 0.33 | 0.36 | 109%   | 0.085              | 0.70            | 1.14          | 0.64          | 0.82 | 0.27 | 33%    | 0.379              |
| DCP2     | 0.37              | 0.49              | 0.18              | 0.34 | 0.15 | 45%    | 0.018              |                 |               |               |      |      |        |                    |
| DIMT1    | 1.22              | 0.94              | 0.30              | 0.82 | 0.47 | 58%    | 0.583              | 1.69            | 2.23          | 1.90          | 1.94 | 0.27 | 14%    | 0.027              |
| DUS1L    | 0.29              | 0.28              | 0.16              | 0.24 | 0.07 | 28%    | 0.003              | 0.70            | 0.99          | 0.36          | 0.68 | 0.31 | 46%    | 0.223              |
| DUS3L    | 1.34              | 1.10              | 1.14              | 1.19 | 0.13 | 10%    | 0.117              | 1.64            | 0.69          | 0.44          | 0.93 | 0.63 | 68%    | 0.856              |
| EIF5A2   | 1.14              | 0.62              | 0.39              | 0.72 | 0.39 | 54%    | 0.333              | 0.10            | 0.56          | 0.08          | 0.25 | 0.27 | 110%   | 0.041              |
| ELP1     | 0.65              | 0.38              | 0.22              | 0.42 | 0.22 | 52%    | 0.043              | 0.98            | 0.91          | 1.01          | 0.97 | 0.05 | 5%     | 0.401              |
| ELP3     | 1.04              | 0.81              | 0.58              | 0.81 | 0.23 | 28%    | 0.283              | 4.15            | 9.12          | 1.39          | 4.89 | 3.92 | 80%    | 0.228              |
| EMG1     | 0.68              | 0.73              | 0.73              | 0.71 | 0.03 | 4%     | 0.003              | 0.73            | 0.83          | 0.50          | 0.69 | 0.17 | 25%    | 0.086              |
| FBL      | 0.49              | 0.67              | 1.50              | 0.89 | 0.54 | 61%    | 0.747              | 1.19            | 0.46          | 0.57          | 0.74 | 0.39 | 53%    | 0.368              |
| FTSJ1    | 0.45              | 0.26              | 0.23              | 0.31 | 0.12 | 39%    | 0.010              | 1.71            | 0.74          | 0.81          | 1.09 | 0.54 | 50%    | 0.808              |
| HSD17B10 | 0.58              | 0.26              | 0.17              | 0.34 | 0.21 | 62%    | 0.032              | 1.07            | 1.15          | 1.05          | 1.09 | 0.05 | 5%     | 0.099              |
| MEPCE    | 1.18              | 0.66              | 0.77              | 0.87 | 0.28 | 32%    | 0.505              | 1.43            | 2.24          | 0.52          | 1.39 | 0.86 | 62%    | 0.511              |
| MRM1     | 0.26              | 0.71              | 0.32              | 0.43 | 0.24 | 57%    | 0.055              |                 |               |               |      |      |        |                    |

|         |      |      |      |      |      |     |       |      |      |      |      |      |      |       |
|---------|------|------|------|------|------|-----|-------|------|------|------|------|------|------|-------|
| MRM2    | 2.87 | 1.16 | 0.53 | 1.52 | 1.21 | 80% | 0.533 | 1.52 | 1.48 | 0.61 | 1.20 | 0.51 | 42%  | 0.563 |
| MRM3    | 1.25 | 1.36 | 0.97 | 1.19 | 0.20 | 17% | 0.238 | 1.57 | 1.13 | 1.07 | 1.26 | 0.27 | 21%  | 0.240 |
| MTO1    | 1.21 | 0.65 | 0.23 | 0.70 | 0.49 | 71% | 0.399 | 1.17 | 1.26 | 0.77 | 1.07 | 0.26 | 24%  | 0.696 |
| NAT10   | 0.72 | 0.54 | 0.89 | 0.72 | 0.17 | 24% | 0.105 | 1.16 | 1.76 | 0.71 | 1.21 | 0.53 | 44%  | 0.561 |
| NFS1    | 1.12 | 0.98 | 0.60 | 0.90 | 0.27 | 30% | 0.582 | 1.33 | 0.54 | 0.64 | 0.84 | 0.43 | 51%  | 0.578 |
| NOP2    | 1.91 | 2.83 | 6.58 | 3.77 | 2.48 | 66% | 0.192 | 1.25 | 1.32 | 1.96 | 1.51 | 0.39 | 26%  | 0.151 |
| NUDT16  | 0.95 | 0.39 | 0.30 | 0.55 | 0.35 | 65% | 0.157 | 0.58 | 0.68 | 0.72 | 0.66 | 0.07 | 11%  | 0.015 |
| PCIF1   | 0.95 | 0.44 | 0.37 | 0.58 | 0.32 | 54% | 0.150 | 0.55 | 0.98 | 0.73 | 0.75 | 0.21 | 28%  | 0.185 |
| QTRT1   | 1.89 | 0.78 | 0.56 | 1.07 | 0.71 | 66% | 0.872 | 1.75 | 1.07 | 1.33 | 1.38 | 0.34 | 25%  | 0.191 |
| RNGTT   | 0.76 | 0.42 | 0.46 | 0.55 | 0.19 | 35% | 0.053 | 0.47 | 0.59 | 0.65 | 0.57 | 0.09 | 16%  | 0.015 |
| RNMT    | 1.25 | 0.61 | 0.35 | 0.74 | 0.46 | 63% | 0.431 | 0.69 | 0.76 | 0.79 | 0.75 | 0.05 | 7%   | 0.014 |
| RPUSD2  | 0.73 | 0.65 | 0.14 | 0.51 | 0.32 | 63% | 0.119 | 1.15 | 0.87 | 0.41 | 0.81 | 0.37 | 46%  | 0.474 |
| RPUSD3  | 0.80 | 0.98 | 1.00 | 0.93 | 0.11 | 12% | 0.364 | 1.46 | 1.32 | 0.49 | 1.09 | 0.52 | 48%  | 0.803 |
| RPUSD4  | 0.20 | 0.25 | 0.39 | 0.28 | 0.10 | 36% | 0.006 |      |      |      |      |      |      |       |
| TARBP1  | 0.33 | 0.30 | 0.35 | 0.33 | 0.02 | 8%  | 0.000 | 0.37 | 0.27 | 0.12 | 0.25 | 0.12 | 49%  | 0.009 |
| TFB1M   | 0.39 | 0.34 | 0.30 | 0.34 | 0.04 | 12% | 0.001 | 2.62 | 2.74 | 1.24 | 2.20 | 0.84 | 38%  | 0.131 |
| TGS1    | 2.05 | 4.21 | 1.65 | 2.64 | 1.38 | 52% | 0.176 |      |      |      |      |      |      |       |
| TRIT1   | 0.19 | 0.52 | 0.14 | 0.28 | 0.20 | 72% | 0.026 | 2.57 | 0.16 | 0.14 | 0.96 | 1.40 | 146% | 0.963 |
| TRMT1   | 0.67 | 0.66 | 0.19 | 0.51 | 0.27 | 54% | 0.090 | 0.74 | 0.47 | 0.40 | 0.54 | 0.18 | 33%  | 0.045 |
| TRMT10C | 0.76 | 0.64 | 0.51 | 0.64 | 0.12 | 19% | 0.036 | 0.69 | 1.01 | 0.59 | 0.76 | 0.22 | 29%  | 0.207 |
| TRMT11  | 0.47 | 0.37 | 0.92 | 0.58 | 0.30 | 51% | 0.135 | 1.07 | 0.17 | 0.58 | 0.60 | 0.45 | 74%  | 0.266 |
| TRMT112 | 0.35 | 0.42 | 0.54 | 0.44 | 0.09 | 22% | 0.009 | 0.81 | 0.96 | 1.06 | 0.94 | 0.12 | 13%  | 0.514 |
| TRMT5   | 2.35 | 0.71 | 0.45 | 1.17 | 1.03 | 88% | 0.802 | 2.19 | 0.43 | 0.59 | 1.07 | 0.98 | 91%  | 0.913 |
| TRUB2   | 0.05 | 0.34 | 0.73 | 0.37 | 0.34 | 91% | 0.087 | 0.86 | 0.17 | 0.21 | 0.41 | 0.39 | 94%  | 0.121 |
| TYW3    | 1.24 | 0.75 | 0.63 | 0.87 | 0.32 | 37% | 0.561 | 1.88 | 1.19 | 0.93 | 1.33 | 0.49 | 37%  | 0.358 |
| WDR4    | 0.35 | 0.27 | 0.45 | 0.36 | 0.09 | 26% | 0.007 | 2.52 | 1.52 | 1.23 | 1.76 | 0.68 | 38%  | 0.192 |
| YBX1    | 0.51 | 0.59 | 0.78 | 0.62 | 0.14 | 22% | 0.042 | 0.77 | 0.37 | 1.29 | 0.81 | 0.46 | 57%  | 0.546 |
| RBMX    | 1.19 | 0.96 | 1.45 | 1.20 | 0.24 | 20% | 0.289 | 2.30 | 0.90 | 0.79 | 1.33 | 0.84 | 63%  | 0.567 |
| ELAVL1  | 0.98 | 0.93 | 1.02 | 0.98 | 0.04 | 4%  | 0.422 | 1.37 | 1.25 | 1.47 | 1.36 | 0.11 | 8%   | 0.029 |

|         |      |      |      |      |      |     |       |      |      |      |      |      |      |       |
|---------|------|------|------|------|------|-----|-------|------|------|------|------|------|------|-------|
| SND1    | 0.40 | 0.39 | 0.40 | 0.40 | 0.00 | 0%  | 0.000 | 1.61 | 1.15 | 0.57 | 1.11 | 0.52 | 47%  | 0.750 |
| FMR1    | 0.20 | 0.15 | 0.06 | 0.13 | 0.07 | 54% | 0.002 | 0.86 | 0.12 | 0.93 | 0.64 | 0.45 | 71%  | 0.297 |
| LRPPRC  | 0.44 | 0.63 | 0.47 | 0.51 | 0.10 | 20% | 0.015 | 0.68 | 1.08 | 0.59 | 0.78 | 0.26 | 34%  | 0.292 |
| PUS7L   | 1.19 | 0.33 | 0.31 | 0.61 | 0.50 | 83% | 0.310 | 2.09 | 0.86 | 0.55 | 1.17 | 0.81 | 70%  | 0.757 |
| ALKBH2  | 0.33 | 0.15 | 0.17 | 0.21 | 0.10 | 48% | 0.006 |      |      |      |      |      |      |       |
| ALKBH3  | 1.69 | 0.72 | 0.51 | 0.97 | 0.63 | 65% | 0.950 |      |      |      |      |      |      |       |
| ALKBH4  | 0.96 | 0.59 | 0.47 | 0.68 | 0.26 | 38% | 0.159 | 0.67 | 1.12 | 0.80 | 0.86 | 0.23 | 27%  | 0.406 |
| ALKBH5  | 1.93 | 1.01 | 1.90 | 1.61 | 0.52 | 32% | 0.178 | 1.81 | 1.41 | 1.36 | 1.53 | 0.25 | 16%  | 0.067 |
| FTO     | 0.71 | 2.31 | 1.46 | 1.49 | 0.80 | 53% | 0.396 | 1.00 | 1.47 | 0.68 | 1.05 | 0.40 | 38%  | 0.845 |
| YTHDF1  | 0.29 | 0.38 | 0.33 | 0.33 | 0.04 | 12% | 0.001 | 2.28 | 1.26 | 1.58 | 1.71 | 0.52 | 31%  | 0.143 |
| YTHDF2  | 0.56 | 0.58 | 0.48 | 0.54 | 0.05 | 10% | 0.005 | 3.70 | 1.36 | 2.40 | 2.49 | 1.17 | 47%  | 0.159 |
| YTHDF3  | 0.69 | 0.71 | 0.56 | 0.66 | 0.08 | 12% | 0.018 | 1.81 | 1.64 | 1.49 | 1.65 | 0.16 | 10%  | 0.020 |
| YTHDC1  | 1.80 | 0.68 | 1.29 | 1.26 | 0.56 | 45% | 0.512 | 0.26 | 0.66 | 0.43 | 0.45 | 0.20 | 44%  | 0.042 |
| YTHDC2  | 3.00 | 2.07 | 1.86 | 2.31 | 0.60 | 26% | 0.064 | 0.62 | 1.12 | 0.31 | 0.68 | 0.41 | 60%  | 0.314 |
| METTL3  | 1.28 | 0.61 | 0.47 | 0.79 | 0.43 | 55% | 0.482 | 2.06 | 2.39 | 1.71 | 2.06 | 0.34 | 17%  | 0.033 |
| METTL14 | 0.96 | 0.20 | 0.31 | 0.49 | 0.41 | 84% | 0.163 | 4.32 | 9.79 | 9.86 | 7.99 | 3.18 | 40%  | 0.062 |
| METTL1  | 2.16 | 0.78 | 0.28 | 1.07 | 0.97 | 91% | 0.909 | 0.37 | 0.54 | 0.23 | 0.38 | 0.16 | 42%  | 0.021 |
| METTL16 | 1.53 | 0.82 | 0.41 | 0.92 | 0.57 | 62% | 0.831 | 2.31 | 4.44 | 2.02 | 2.92 | 1.32 | 45%  | 0.128 |
| METTL2B | 0.53 | 0.85 | 0.17 | 0.52 | 0.34 | 66% | 0.135 | 1.05 | 0.68 | 0.59 | 0.77 | 0.24 | 31%  | 0.244 |
| NSUN2   | 0.59 | 0.91 | 0.58 | 0.69 | 0.19 | 28% | 0.109 | 1.10 | 0.24 | 0.25 | 0.53 | 0.49 | 93%  | 0.239 |
| NSUN5   | 0.76 | 0.88 | 0.77 | 0.80 | 0.07 | 8%  | 0.036 | 0.93 | 0.68 | 0.90 | 0.83 | 0.13 | 16%  | 0.167 |
| NSUN6   | 1.02 | 0.70 | 0.32 | 0.68 | 0.35 | 52% | 0.255 | 3.75 | 1.57 | 0.79 | 2.04 | 1.53 | 75%  | 0.361 |
| DNMT1   | 0.63 | 0.51 | 0.45 | 0.53 | 0.09 | 17% | 0.012 | 0.08 | 0.06 | 0.09 | 0.08 | 0.02 | 21%  | 0.000 |
| TRMT61A | 0.36 | 0.56 | 0.44 | 0.45 | 0.10 | 22% | 0.011 | 0.46 | 0.93 | 0.19 | 0.53 | 0.37 | 71%  | 0.158 |
| TRMT61B | 2.98 | 2.47 | 4.14 | 3.20 | 0.86 | 27% | 0.047 | 4.21 | 0.26 | 0.70 | 1.73 | 2.17 | 126% | 0.621 |
| TRMT6   | 0.36 | 0.75 | 0.36 | 0.49 | 0.22 | 46% | 0.059 | 0.16 | 0.08 | 0.14 | 0.13 | 0.04 | 33%  | 0.001 |
| PUS7    | 0.79 | 0.60 | 0.25 | 0.55 | 0.28 | 51% | 0.105 | 0.33 | 0.88 | 0.20 | 0.47 | 0.36 | 76%  | 0.125 |
| IGF2BP1 | 0.67 | 1.02 | 0.83 | 0.84 | 0.17 | 21% | 0.253 | 3.33 | 0.71 | 0.98 | 1.67 | 1.44 | 86%  | 0.504 |
| IGF2BP2 | 0.50 | 0.63 | 1.22 | 0.78 | 0.38 | 49% | 0.428 | 1.93 | 0.62 | 1.05 | 1.20 | 0.67 | 56%  | 0.660 |

|           |      |      |      |      |      |     |       |      |      |      |      |      |      |       |
|-----------|------|------|------|------|------|-----|-------|------|------|------|------|------|------|-------|
| IGF2BP3   | 1.06 | 1.20 | 0.90 | 1.05 | 0.15 | 14% | 0.585 | 2.71 | 1.61 | 1.42 | 1.91 | 0.70 | 37%  | 0.152 |
| WTAP      | 1.79 | 0.93 | 1.11 | 1.28 | 0.45 | 36% | 0.401 | 0.87 | 0.84 | 0.75 | 0.82 | 0.06 | 8%   | 0.037 |
| VIRMA     | 1.11 | 0.61 | 0.51 | 0.74 | 0.32 | 43% | 0.297 | 0.52 | 1.76 | 0.69 | 0.99 | 0.67 | 68%  | 0.983 |
| RBM15B    | 2.04 | 1.29 | 2.47 | 1.93 | 0.60 | 31% | 0.114 | 1.70 | 1.09 | 1.04 | 1.28 | 0.37 | 29%  | 0.321 |
| RBM15     | 1.41 | 0.88 | 0.97 | 1.08 | 0.28 | 26% | 0.658 | 1.73 | 4.56 | 1.37 | 2.55 | 1.75 | 68%  | 0.264 |
| ZC3H13    | 3.39 | 1.43 | 3.59 | 2.81 | 1.19 | 42% | 0.120 | 0.21 | 0.64 | 1.04 | 0.63 | 0.41 | 66%  | 0.263 |
| EIF3A     | 0.43 | 0.40 | 0.30 | 0.38 | 0.07 | 17% | 0.004 | 1.41 | 1.15 | 0.87 | 1.14 | 0.27 | 23%  | 0.448 |
| EIF3B     | 0.39 | 0.29 | 0.37 | 0.35 | 0.05 | 15% | 0.002 | 1.24 | 1.56 | 1.13 | 1.31 | 0.22 | 17%  | 0.139 |
| HNRNPA2B1 | 1.12 | 1.02 | 1.10 | 1.08 | 0.05 | 5%  | 0.116 | 1.66 | 0.96 | 2.24 | 1.62 | 0.64 | 40%  | 0.236 |
| HNRNPC    | 1.02 | 1.56 | 1.01 | 1.20 | 0.32 | 26% | 0.391 | 0.42 | 0.67 | 0.46 | 0.51 | 0.14 | 27%  | 0.026 |
| PUS1      | 0.67 | 0.73 | 0.41 | 0.60 | 0.17 | 28% | 0.057 | 0.76 | 0.62 | 0.61 | 0.66 | 0.08 | 13%  | 0.020 |
| TRUB1     | 1.01 | 0.73 | 0.53 | 0.76 | 0.24 | 32% | 0.219 | 0.02 | 0.15 | 0.00 | 0.06 | 0.08 | 135% | 0.002 |
| DKC1      | 0.88 | 0.53 | 0.79 | 0.73 | 0.18 | 24% | 0.122 | 0.43 | 0.38 | 0.35 | 0.39 | 0.04 | 10%  | 0.001 |
| NSUN4     | 0.88 | 0.84 | 0.76 | 0.83 | 0.06 | 8%  | 0.042 | 0.71 | 0.68 | 0.77 | 0.72 | 0.05 | 6%   | 0.009 |
| TRDMT1    | 0.72 | 0.71 | 0.99 | 0.80 | 0.16 | 20% | 0.165 |      |      |      |      |      |      |       |
| ALYREF    | 0.83 | 0.69 | 0.95 | 0.82 | 0.13 | 16% | 0.143 | 1.54 | 1.04 | 1.61 | 1.40 | 0.31 | 22%  | 0.156 |
| METTL8    | 2.23 | 1.64 | 0.66 | 1.51 | 0.79 | 53% | 0.382 | 0.25 | 0.00 | 0.53 | 0.26 | 0.27 | 102% | 0.041 |
| PUS3      | 0.52 | 0.31 | 0.11 | 0.31 | 0.21 | 66% | 0.029 | 0.37 | 0.38 | 0.33 | 0.36 | 0.03 | 8%   | 0.001 |
| ZCCHC4    | 1.11 | 0.96 | 0.63 | 0.90 | 0.25 | 27% | 0.547 |      |      |      |      |      |      |       |
| CBLL1     | 1.25 | 0.68 | 0.87 | 0.93 | 0.29 | 31% | 0.724 | 0.70 | 0.19 | 0.06 | 0.31 | 0.34 | 107% | 0.072 |
| CIAO1     | 0.43 | 0.45 | 0.53 | 0.47 | 0.05 | 12% | 0.003 | 0.73 | 1.35 | 0.88 | 0.99 | 0.32 | 33%  | 0.955 |
| DIS3L2    | 1.38 | 0.53 | 0.28 | 0.73 | 0.58 | 79% | 0.506 | 1.54 | 2.77 | 0.99 | 1.77 | 0.91 | 51%  | 0.281 |
| FTSJ3     | 0.61 | 0.54 | 0.84 | 0.66 | 0.16 | 23% | 0.064 | 0.09 | 0.15 | 0.05 | 0.10 | 0.05 | 51%  | 0.001 |
| ISCU      | 1.10 | 0.42 | 0.22 | 0.58 | 0.46 | 79% | 0.255 | 1.09 | 0.77 | 1.01 | 0.96 | 0.17 | 18%  | 0.696 |
| LAGE3     | 1.59 | 0.76 | 0.35 | 0.90 | 0.63 | 70% | 0.813 |      |      |      |      |      |      |       |
| METTL15   | 0.46 | 0.24 | 0.31 | 0.34 | 0.12 | 35% | 0.010 | 4.54 | 0.64 | 0.70 | 1.96 | 2.24 | 114% | 0.536 |
| METTL17   | 0.68 | 0.38 | 0.33 | 0.46 | 0.19 | 41% | 0.039 | 1.97 | 1.46 | 7.39 | 3.60 | 3.29 | 91%  | 0.304 |
| METTL5    | 0.81 | 0.31 | 0.37 | 0.50 | 0.27 | 54% | 0.085 | 4.91 | 1.54 | 0.00 | 2.15 | 2.51 | 117% | 0.511 |
| MPST      | 0.44 | 0.23 | 0.21 | 0.29 | 0.13 | 45% | 0.011 | 0.46 | 0.79 | 0.34 | 0.53 | 0.23 | 44%  | 0.073 |

|        |      |      |      |      |      |     |       |      |      |      |      |      |      |       |
|--------|------|------|------|------|------|-----|-------|------|------|------|------|------|------|-------|
| SNU13  | 0.75 | 0.58 | 0.60 | 0.64 | 0.09 | 14% | 0.021 | 0.70 | 1.26 | 1.16 | 1.04 | 0.30 | 29%  | 0.834 |
| NUBP1  | 1.03 | 0.59 | 0.35 | 0.65 | 0.34 | 53% | 0.224 | 1.17 | 1.31 | 1.37 | 1.28 | 0.11 | 8%   | 0.044 |
| OSGEP  | 1.27 | 0.68 | 0.37 | 0.77 | 0.45 | 59% | 0.479 | 0.78 | 1.38 | 1.07 | 1.08 | 0.30 | 28%  | 0.695 |
| PRRC2A | 0.28 | 0.43 | 0.55 | 0.42 | 0.13 | 32% | 0.017 | 3.50 | 0.03 | 1.07 | 1.53 | 1.78 | 116% | 0.656 |
| TFB2M  | 1.07 | 0.81 | 0.96 | 0.95 | 0.13 | 14% | 0.549 |      |      |      |      |      |      |       |
| TP53RK | 1.18 | 0.63 | 0.23 | 0.68 | 0.48 | 70% | 0.367 | 0.93 | 1.34 | 1.96 | 1.41 | 0.52 | 37%  | 0.305 |
| TPRKB  | 0.06 | 0.39 | 0.41 | 0.29 | 0.20 | 68% | 0.024 |      |      |      |      |      |      |       |
| TUT7   | 4.07 | 2.69 | 3.22 | 3.32 | 0.70 | 21% | 0.029 |      |      |      |      |      |      |       |
| WDR6   | 0.61 | 0.36 | 0.23 | 0.40 | 0.20 | 49% | 0.034 | 1.01 | 1.80 | 1.01 | 1.27 | 0.46 | 36%  | 0.412 |
| YRDC   | 0.11 | 0.14 | 0.06 | 0.10 | 0.04 | 38% | 0.001 | 0.61 | 0.81 | 0.54 | 0.65 | 0.14 | 21%  | 0.048 |

**Table S1c. LC-PRM quantification results of tryptic peptides from RWE proteins in whole-cell lysate of *SETD2*<sup>-/-</sup> cells (n = 3) relative to parental HEK293T cells (n = 3).**

| Peptide                    | standard type      | Protein Symbol | Protein Gene                  | SETD2_KO/HEK293T<br>-1 | SETD2_KO/HEK293T<br>-2 | SETD2_KO/HEK293T<br>-3 |
|----------------------------|--------------------|----------------|-------------------------------|------------------------|------------------------|------------------------|
| YLNTNPVGGLLLEYAR           | surrogate standard | ADAR           | ADAR ADAR1 DSRAD G1P1 IFI4    | 0.98                   | 0.84                   | 0.65                   |
| IPLVVYGCQNER               | surrogate standard | ADAT2          | ADAT2 DEADC1                  | 2.46                   | 2.71                   | 1.43                   |
| AVGAVVVDPASDR              | surrogate standard | ADAT3          | ADAT3 TAD3                    | 0.44                   | 0.15                   | 0.63                   |
| VFYGAPSPDGALGTR            | surrogate standard | ADAT3          | ADAT3 TAD3                    | 0.05                   | 0.07                   | 0.18                   |
| GVLEEQCR                   | surrogate standard | ADAT3          | ADAT3 TAD3                    | 0.84                   | 0.13                   | 1.06                   |
| AVLQLYPENSEQLELITTQA<br>TK | surrogate standard | BUD23          | WBSCR22 MERM1 HUSSY-03 PP3381 | 0.37                   | 0.19                   | 0.45                   |
| AGFSGGMVVDPNSAK            | surrogate standard | BUD23          | WBSCR22 MERM1 HUSSY-03 PP3381 | 0.12                   | 0.05                   | 0.09                   |
| ESVFTNER                   | surrogate standard | BUD23          | WBSCR22 MERM1 HUSSY-03 PP3381 | 0.12                   | 0.02                   | 0.06                   |
| VVEVVEETIK                 | surrogate standard | CDKAL1         | CDKAL1                        | 0.89                   | 0.67                   | 0.97                   |
| GNLASYPIDELVDR             | surrogate standard | CDKAL1         | CDKAL1                        | 0.67                   | 0.38                   | 0.46                   |
| DIGTNLPTLLWK               | surrogate standard | CDKAL1         | CDKAL1                        | 1.84                   | 1.63                   | 0.90                   |
| GFGMTLK                    | surrogate standard | CMTR1          | CMTR1 FTSJD2 KIAA0082 MTR1    | 0.19                   | 0.07                   | 0.11                   |
| NTSDSVNLVVPLEVIK           | surrogate standard | CMTR1          | CMTR1 FTSJD2 KIAA0082 MTR1    | 0.74                   | 0.24                   | 1.09                   |
| SQIYTDGR                   | surrogate standard | CMTR1          | CMTR1 FTSJD2 KIAA0082 MTR1    | 0.02                   | 0.00                   | 0.02                   |
| DSTVLAHVLR                 | surrogate standard | CTU1           | CTU1 ATPBD3 NCS6              | 3.77                   | 1.38                   | 0.51                   |
| GGGLGSPGEGGALPR            | surrogate standard | CTU1           | CTU1 ATPBD3 NCS6              | 1.48                   | 1.27                   | 0.89                   |
| EELLQTLR                   | surrogate standard | CTU2           | CTU2                          | 0.93                   | 0.80                   | 0.75                   |
| LQTQFPSTVSTVYR             | surrogate standard | CTU2           | CTU2                          | 0.51                   | 0.49                   | 0.21                   |
| NILHQGQEAILQR              | surrogate standard | DCPS           | DCPS DCS1 HINT5 HSPC015       | 0.89                   | 0.44                   | 0.43                   |
| NPLIINSIDK                 | surrogate standard | DIMT1          | DIMT1 DIMT1L HUSSY-05         | 2.56                   | 2.70                   | 1.76                   |
| LQGFEFWSR                  | surrogate standard | DUS1L          | DUS1L                         | 0.15                   | 0.21                   | 0.18                   |



|                          |                    |          |                                           |      |      |      |
|--------------------------|--------------------|----------|-------------------------------------------|------|------|------|
| LSVPVTCK                 | surrogate standard | DUS1L    | DUS1L                                     | 0.31 | 0.65 | 0.27 |
| YLETKPADLGPR             | surrogate standard | DUS3L    | DUS3L                                     | 1.37 | 0.22 | 0.68 |
| GTQPPSIR                 | surrogate standard | DUS3L    | DUS3L                                     | 2.11 | 0.32 | 0.63 |
| TCGPLTDEDVVR             | surrogate standard | DUS3L    | DUS3L                                     | 0.36 | 0.24 | 0.52 |
| NGFVVLK                  | surrogate standard | EIF5A2   | EIF5A2                                    | 0.02 | 0.02 | 0.02 |
| NEVSLVAEGFLPEDGSGR       | surrogate standard | ELP1     | IKBKAP ELP1 IKAP                          | 1.08 | 0.33 | 0.86 |
| VLVTVFR                  | surrogate standard | ELP1     | IKBKAP ELP1 IKAP                          | 0.11 | 0.23 | 0.09 |
| DQLVGLGR                 | surrogate standard | ELP1     | IKBKAP ELP1 IKAP                          | 1.13 | 1.23 | 1.45 |
| YDPFLQTR                 | surrogate standard | ELP3     | ELP3                                      | 4.04 | 5.11 | 1.54 |
| LYPTLVIR                 | surrogate standard | ELP3     | ELP3                                      | 4.81 | 8.65 | 0.83 |
| VEPCSLTPGYTK             | surrogate standard | ELP4     | ELP4 C11orf19 PAXNEB                      | 4.40 | 2.48 | 2.08 |
| TYELLNCDK                | surrogate standard | EMG1     | EMG1 C2F                                  | 0.88 | 0.47 | 1.00 |
| VGTSFSIPVSDVR            | surrogate standard | EMG1     | EMG1 C2F                                  | 0.78 | 0.67 | 0.44 |
| VSVEYTEK                 | surrogate standard | EMG1     | EMG1 C2F                                  | 0.60 | 0.64 | 0.35 |
| NVMVEPHR                 | surrogate standard | FBL      | FBL FIB1 FLRN                             | 1.10 | 0.02 | 0.28 |
| NLVPGESVYGEK             | surrogate standard | FBL      | FBL FIB1 FLRN                             | 0.53 | 0.56 | 0.80 |
| AVDLCAAPGSWSQVLSQK       | surrogate standard | FTSJ1    | FTSJ1 JM23                                | 0.87 | 0.41 | 0.47 |
| SYPLDLEGGSEYK            | surrogate standard | FTSJ1    | FTSJ1 JM23                                | 1.19 | 0.55 | 0.86 |
| DLALAAEALR               | surrogate standard | GTPBP3   | GTPBP3 MTGP1                              | 0.57 | 0.32 | 0.66 |
| GLVAVITGGASGLGLATAE<br>R | surrogate standard | HSD17B10 | HSD17B10 ERAB HADH2 MRPP2 SCHAD<br>XH98G2 | 0.72 | 0.62 | 0.73 |
| DVQTALALAK               | surrogate standard | HSD17B10 | HSD17B10 ERAB HADH2 MRPP2 SCHAD<br>XH98G2 | 2.41 | 2.69 | 2.12 |
| VCNFLASQVPFPSR           | surrogate standard | HSD17B10 | HSD17B10 ERAB HADH2 MRPP2 SCHAD<br>XH98G2 | 1.09 | 1.27 | 0.79 |
| IPVEGEVPEAR              | surrogate standard | LCMT2    | LCMT2 KIAA0547 TYW4                       | 0.76 | 0.18 | 0.89 |
| NSCNVGGGGGGFK            | surrogate standard | MEPCE    | MEPCE BCDIN3                              | 0.08 | 0.00 | 0.00 |

|                 |                    |        |                    |      |      |      |
|-----------------|--------------------|--------|--------------------|------|------|------|
| FQYGNYSK        | surrogate standard | MEPCE  | MEPCE BCDIN3       | 2.88 | 1.34 | 0.97 |
| SCFPASLTASR     | surrogate standard | MEPCE  | MEPCE BCDIN3       | 0.13 | 0.05 | 0.06 |
| LASALLAEQEPQPER | surrogate standard | MOCS3  | MOCS3 UBA4         | 0.95 | 0.54 | 0.99 |
| ILEVLPGR        | surrogate standard | MRM2   | FTSJ2 FJH1 MRM2    | 0.96 | 0.56 | 0.72 |
| APSTWEESGLR     | surrogate standard | MRM3   | RNMTL1 MRM3 HC90   | 1.67 | 1.22 | 1.32 |
| LGFVVGR         | surrogate standard | MTO1   | MTO1 CGI-02        | 0.02 | 0.03 | 0.00 |
| LIPEASISTSR     | surrogate standard | MTO1   | MTO1 CGI-02        | 1.34 | 1.14 | 1.23 |
| SLFVVVGR        | surrogate standard | NAT10  | NAT10 ALP KIAA1709 | 0.01 | 0.03 | 0.10 |
| LDYLGVSGLTPR    | surrogate standard | NAT10  | NAT10 ALP KIAA1709 | 1.89 | 2.12 | 1.31 |
| AGPNASIISLK     | surrogate standard | NAT10  | NAT10 ALP KIAA1709 | 1.56 | 1.70 | 0.65 |
| SLEAEGFQVTLVPVK | surrogate standard | NFS1   | NFS1 NIFS HUSSY-08 | 1.63 | 1.00 | 1.22 |
| VEALQSGGGQER    | surrogate standard | NFS1   | NFS1 NIFS HUSSY-08 | 2.04 | 0.03 | 1.03 |
| AIGTDEDLAHSSIR  | surrogate standard | NFS1   | NFS1 NIFS HUSSY-08 | 0.80 | 0.44 | 0.94 |
| IQDIVGILR       | surrogate standard | NOP2   | NOP2 NOL1 NSUN1    | 2.22 | 2.99 | 2.54 |
| DLAQALINR       | surrogate standard | NOP2   | NOP2 NOL1 NSUN1    | 1.54 | 2.47 | 1.91 |
| GADSELSTVPSVTK  | surrogate standard | NOP2   | NOP2 NOL1 NSUN1    | 1.70 | 0.97 | 2.15 |
| GTDTQTPAVLSPSK  | surrogate standard | NOP2   | NOP2 NOL1 NSUN1    | 1.96 | 1.16 | 3.33 |
| LGFPGGFVDTQDR   | surrogate standard | NUDT16 | NUDT16             | 0.27 | 0.15 | 0.20 |
| LQELSAAYR       | surrogate standard | PCIF1  | PCIF1              | 0.71 | 0.55 | 0.68 |
| GITTEQLDALGCR   | surrogate standard | QTRT1  | QTRT1 TGT TGUT     | 1.67 | 1.10 | 1.37 |
| SPYDGNETLLSPEK  | surrogate standard | QTRT1  | QTRT1 TGT TGUT     | 1.87 | 0.90 | 1.55 |
| YDSQVAEENR      | surrogate standard | RNGTT  | RNGTT CAP1A        | 0.84 | 0.00 | 0.83 |
| FNSQPVGDCDFNVR  | surrogate standard | RNGTT  | RNGTT CAP1A        | 0.74 | 0.41 | 0.60 |
| SVLIGEFLEK      | surrogate standard | RNMT   | RNMT KIAA0398      | 0.29 | 0.28 | 0.38 |

|                     |                    |         |                                |      |      |      |
|---------------------|--------------------|---------|--------------------------------|------|------|------|
| TFLEFYEEK           | surrogate standard | RNMT    | RNMT KIAA0398                  | 0.27 | 0.13 | 0.40 |
| LPLGTL SK           | surrogate standard | RNMT    | RNMT KIAA0398                  | 0.79 | 1.18 | 0.70 |
| AQPLAYYEA AVR       | surrogate standard | RPUSD2  | RPUSD2 C15orf19                | 0.83 | 0.74 | 0.76 |
| GKPCETV FQR         | surrogate standard | RPUSD2  | RPUSD2 C15orf19                | 2.85 | 0.72 | 0.67 |
| LSYNGQSSV VR        | surrogate standard | RPUSD2  | RPUSD2 C15orf19                | 0.15 | 0.04 | 0.01 |
| VGTVLGQR            | surrogate standard | RPUSD3  | RPUSD3                         | 0.53 | 0.23 | 0.07 |
| DTPVELLAPLP PYFSR   | surrogate standard | RPUSD3  | RPUSD3                         | 1.41 | 0.37 | 0.94 |
| GSGGAGALPEA AR      | surrogate standard | TARBP1  | TARBP1 TRM3 TRP185             | 0.68 | 0.13 | 0.27 |
| DGPFVYGR            | surrogate standard | TFB1M   | TFB1M CGI-75                   | 2.77 | 3.19 | 1.33 |
| YGGIPNF SHR         | surrogate standard | TGS1    | TGS1 HCA137 NCOA6IP PIMT       | 4.80 |      | 2.02 |
| DYFEDQPLLYPPG FDGR  | surrogate standard | THG1L   | THG1L ICF45                    | 0.31 | 0.02 | 0.62 |
| VVVYPSNQTLK         | surrogate standard | THG1L   | THG1L ICF45                    | 0.39 | 0.35 | 0.21 |
| ELAGIVCTLNSE NK     | surrogate standard | THUMPD1 | THUMPD1                        | 1.69 | 1.03 | 1.59 |
| AVCCLSVVK           | surrogate standard | THUMPD1 | THUMPD1                        | 0.87 | 0.96 | 1.00 |
| STLALQLGQR          | surrogate standard | TRIT1   | TRIT1 IPT MOD5                 | 0.23 | 0.38 | 0.23 |
| IAFPSANEVFNYPVQEFNR | surrogate standard | TRMT1   | TRMT1                          | 0.62 | 0.40 | 0.77 |
| DLTCAVITEFAR        | surrogate standard | TRMT1   | TRMT1                          | 0.64 | 0.48 | 0.73 |
| FALEVPGLR           | surrogate standard | TRMT1   | TRMT1                          | 0.04 | 0.01 | 0.02 |
| DVVHSTLR            | surrogate standard | TRMT10A | TRMT10A RG9MTD2                | 4.09 | 2.36 | 1.77 |
| IPAVTYPK            | surrogate standard | TRMT10C | TRMT10C MRPP1 RG9MTD1          | 1.02 | 1.89 | 0.76 |
| EVPEHITEEELK        | surrogate standard | TRMT10C | TRMT10C MRPP1 RG9MTD1          | 0.45 | 0.28 | 0.61 |
| LLLTSTEK            | surrogate standard | TRMT10C | TRMT10C MRPP1 RG9MTD1          | 0.09 | 0.08 | 0.10 |
| IDALEFLPFEGK        | surrogate standard | TRMT11  | TRMT11 C6orf75 MDS024          | 0.40 | 0.21 | 0.66 |
| ICPVEFNPNFVAR       | surrogate standard | TRMT112 | TRMT112 AD-001 HSPC152 HSPC170 | 1.52 | 2.08 | 1.01 |

|                      |                    |         |                                |      |      |      |
|----------------------|--------------------|---------|--------------------------------|------|------|------|
| GPVEGYEENEFLR        | surrogate standard | TRMT112 | TRMT112 AD-001 HSPC152 HSPC170 | 0.71 | 0.55 | 0.81 |
| ILCPLDPK             | surrogate standard | TRMT13  | TRMT13 CCDC76                  | 1.13 | 0.27 | 0.86 |
| AEDLVPTLVSR          | surrogate standard | TRMT2A  | TRMT2A HTF9C                   | 0.54 | 0.83 | 0.61 |
| WSAALPCAEAR          | surrogate standard | TRMT44  | TRMT44 C4orf23 METTL19         | 0.51 | 0.63 | 0.65 |
| AVLPEGQDVTSGFSR      | surrogate standard | TRMT5   | TRMT5 KIAA1393 TRM5            | 0.97 | 0.57 | 0.85 |
| DANPAEDVR            | surrogate standard | TRMT5   | TRMT5 KIAA1393 TRM5            | 1.30 | 0.03 | 1.04 |
| DGFFTLDSALLR         | surrogate standard | TRUB2   | TRUB2                          | 0.80 | 0.12 | 0.65 |
| AATPQVAEELEK         | surrogate standard | TRUB2   | TRUB2                          | 0.67 | 0.10 | 0.29 |
| DQFFTTSSCAGR         | surrogate standard | TYW3    | TYW3 C1orf171                  | 1.56 | 0.82 | 0.86 |
| CTALTFIASEEK         | surrogate standard | WDR4    | WDR4                           | 4.41 | 2.09 | 1.87 |
| ISVVPTQPGLLLSSSGDGLR | surrogate standard | WDR4    | WDR4                           | 1.24 | 0.99 | 1.19 |
| GAEAANVTGPGGVPVQGSK  | surrogate standard | YBX1    | YBX1 NSEP1 YB1                 | 1.29 | 1.30 | 1.69 |
| NEGSESAPEGQAQQR      | surrogate standard | YBX1    | YBX1 NSEP1 YB1                 | 0.97 | 0.02 | 0.90 |
| AADPPAENSSAPEAEQGGAE | surrogate standard | YBX1    | YBX1 NSEP1 YB1                 | 0.41 | 0.11 | 1.17 |
| ALEAVFGK             | surrogate standard | RBMX    | RBMX HNRPG RBMXP1              | 1.06 | 1.37 | 1.50 |
| SAPSGPVR             | surrogate standard | RBMX    | RBMX HNRPG RBMXP1              | 0.27 | 0.00 | 0.01 |
| SDLYSSGR             | surrogate standard | RBMX    | RBMX HNRPG RBMXP1              | 3.09 | 0.39 | 1.60 |
| SLFSSIGEVESAK        | surrogate standard | ELAVL1  | HuR                            | 1.42 | 1.10 | 1.02 |
| DVEDMFSR             | surrogate standard | ELAVL1  | HuR                            | 1.32 | 0.95 | 1.37 |
| VLVDQTTGLSR          | surrogate standard | ELAVL1  | HuR                            | 0.81 | 0.77 | 0.85 |
| YTIENPR              | surrogate standard | SND1    | SND1 TDRD11                    | 1.93 | 2.37 | 1.25 |
| EVLPSTR              | surrogate standard | SND1    | SND1 TDRD11                    | 2.43 | 0.23 | 1.50 |
| LGTLSPAFSTR          | surrogate standard | SND1    | SND1 TDRD11                    | 0.52 | 0.55 | 0.22 |
| DINESDEVEVYSR        | surrogate standard | FMR1    | FMR1                           | 0.72 | 0.08 | 1.44 |

|                  |                    |        |                       |      |      |      |
|------------------|--------------------|--------|-----------------------|------|------|------|
| SFLEFAEDVIQVPR   | surrogate standard | FMR1   | FMR1                  | 0.50 | 0.20 | 0.93 |
| IPENIYR          | surrogate standard | LRPPRC | LRPPRC LRP130         | 1.46 | 1.88 | 1.26 |
| LQWFCDR          | surrogate standard | LRPPRC | LRPPRC LRP130         | 0.01 | 0.02 | 0.08 |
| LDLQNLSDLEDR     | surrogate standard | PUS7L  | PUS7L                 | 1.62 | 1.00 | 1.17 |
| FGNLVETK         | surrogate standard | PUS7L  | PUS7L                 | 1.44 | 0.54 | 0.59 |
| LNIPGCYR         | surrogate standard | PUS7L  | PUS7L                 | 0.64 | 0.36 | 0.07 |
| AEAGILNYYR       | isotopic standard  | ALKBH1 | ALKBH1 ABH ABH1 ALKBH | 0.95 | 1.47 | 0.69 |
| LLNHAVPR         | surrogate standard | ALKBH1 | ALKBH1 ABH ABH1 ALKBH | 1.60 | 1.43 | 1.24 |
| ELSAEFGPGGR      | isotopic standard  | ALKBH4 | ALKBH4 ABH4           | 0.68 | 0.54 | 0.88 |
| VSEPVLSLPVR      | isotopic standard  | ALKBH5 | ALKBH5 ABH5 OFOXD1    | 1.18 | 0.97 | 0.88 |
| VPALPFR          | isotopic standard  | ALKBH6 | ALKBH6 ABH6           | 2.56 | 4.47 | 2.44 |
| ILIGNPGCTYK      | surrogate standard | FTO    | FTO KIAA1752          | 1.03 | 1.46 | 1.04 |
| EGLPVEQR         | surrogate standard | FTO    | FTO KIAA1752          | 0.77 | 0.43 | 0.49 |
| SGPVMGGGLPPPIK   | surrogate standard | YTHDF1 | YTHDF1                | 4.35 | 1.88 | 3.01 |
| SPVDYGTSGVWSQDK  | isotopic standard  | YTHDF1 | YTHDF1                | 1.57 | 0.39 | 1.99 |
| DGLNDDDFEPYLSQAR | isotopic standard  | YTHDF2 | YTHDF2 HGRG8          | 1.48 | 0.68 | 2.34 |
| LGSTEVASNVPK     | surrogate standard | YTHDF2 | YTHDF2 HGRG8          | 1.77 | 2.43 | 1.99 |
| DVPNSQLR         | surrogate standard | YTHDF2 | YTHDF2 HGRG8          | 5.31 | 0.41 | 2.49 |
| AITDGGAGFGNDTSLK | isotopic standard  | YTHDF3 | YTHDF3                | 1.72 | 0.84 | 1.45 |
| VPGISSIEQGMTGLK  | isotopic standard  | YTHDF3 | YTHDF3                | 3.26 | 1.96 | 2.14 |
| GNVGIGGSAPPPPIK  | isotopic standard  | YTHDF3 | YTHDF3                | 1.32 | 1.04 | 0.74 |
| GVWSTLPVNEK      | isotopic standard  | YTHDC1 | YTHDC1 KIAA1966 YT521 | 0.35 | 0.29 | 0.34 |
| LSQSLGLVSK       | surrogate standard | YTHDC2 | YTHDC2                | 0.12 | 0.08 | 0.05 |
| VVLIVGETGSGK     | isotopic standard  | YTHDC2 | YTHDC2                | 0.30 | 0.25 | 0.20 |
| NPEAALSPTFR      | isotopic standard  | METTL3 | METTL3 MTA70          | 2.69 | 2.64 | 1.73 |
| YLDVSILGK        | surrogate standard | METTL3 | METTL3 MTA70          | 0.99 | 1.72 | 1.00 |

|                   |                    |         |                               |      |      |      |
|-------------------|--------------------|---------|-------------------------------|------|------|------|
| VEIIVVK           | surrogate standard | METTL3  | METTL3 MTA70                  | 2.83 | 1.36 | 2.21 |
| LEIDEIAAPR        | isotopic standard  | METTL14 | METTL14 KIAA1627              | 3.21 | 4.33 | 7.43 |
| VSDYVQDR          | surrogate standard | METTL1  | METTL1 C12orf1                | 0.79 | 0.21 | 0.40 |
| AAPAGGFQNIACLR    | isotopic standard  | METTL1  | METTL1 C12orf1                | 0.03 | 0.11 | 0.05 |
| NFPAIFR           | surrogate standard | METTL1  | METTL1 C12orf1                | 0.29 | 0.65 | 0.22 |
| LPGVAGQYLFK       | surrogate standard | METTL16 | METTL16 METT10D               | 2.96 | 5.91 | 2.23 |
| TQTPPVEENVTK      | isotopic standard  | METTL2B | METTL2B                       | 1.01 | 0.18 | 0.79 |
| GAEQLAEGGR        | surrogate standard | NSUN2   | NSUN2 SAKI TRM4               | 1.11 | 0.08 | 0.76 |
| ILLTQENPFFR       | surrogate standard | NSUN2   | NSUN2 SAKI TRM4               | 0.05 | 0.06 | 0.06 |
| QLEEPGAGTPSPVR    | surrogate standard | NSUN5   | NSUN5 NSUN5A WBSCR20 WBSCR20A | 1.49 | 0.41 | 1.47 |
| DALQQNPGAFR       | surrogate standard | NSUN5   | NSUN5 NSUN5A WBSCR20 WBSCR20A | 1.21 | 0.18 | 0.84 |
| EVASYQLQR         | isotopic standard  | NSUN6   | NSUN6 NOPD1                   | 1.03 | 0.65 | 0.68 |
| GAGLSCEQLK        | surrogate standard | NSUN6   | NSUN6 NOPD1                   | 2.83 | 0.55 | 0.41 |
| FCSFSPCIEVQQR     | surrogate standard | TRMT61A | TRMT61A                       | 0.85 | 0.91 | 0.61 |
| TCQALAAR          | isotopic standard  | TRMT61A | TRMT61A                       | 0.47 | 0.09 | 0.10 |
| HSVDLIGR          | surrogate standard | TRMT61A | TRMT61A                       | 0.71 | 1.69 | 0.27 |
| INTDVQLDSQEK      | surrogate standard | TRMT61B | TRMT61B                       | 2.98 | 0.00 | 1.65 |
| AATACFGPK         | isotopic standard  | TRMT6   | TRMT6 KIAA1153 TRM6 CGI-09    | 0.08 | 0.05 | 0.07 |
| SFLSGLYEFPLNK     | surrogate standard | TRMT6   | TRMT6 KIAA1153 TRM6 CGI-09    | 0.10 | 0.10 | 0.22 |
| SLFPGLETK         | surrogate standard | PUS7    | PUS7 KIAA1897                 | 0.08 | 0.08 | 0.04 |
| FGTTAVPTYQVGR     | isotopic standard  | PUS7    | PUS7 KIAA1897                 | 0.72 | 0.82 | 0.30 |
| QGSPVAAGAPAK      | surrogate standard | IGF2BP1 | IGF2BP1 CRDBP VICKZ1 ZBP1     | 2.75 | 0.16 | 0.87 |
| ITISSQLDLTYNPER   | isotopic standard  | IGF2BP1 | IGF2BP1 CRDBP VICKZ1 ZBP1     | 0.77 | 0.61 | 1.00 |
| TVNELQNLTAEEVVPR  | surrogate standard | IGF2BP1 | IGF2BP1 CRDBP VICKZ1 ZBP1     | 0.72 | 0.52 | 0.71 |
| LYIGNLSPAVTADDLR  | isotopic standard  | IGF2BP2 | IGF2BP2 IMP2 VICKZ2           | 0.64 | 0.51 | 0.92 |
| TVNELQNLTSAEVIVPR | surrogate standard | IGF2BP2 | IGF2BP2 IMP2 VICKZ2           | 1.62 | 0.60 | 1.09 |

|                  |                    |           |                          |      |      |      |
|------------------|--------------------|-----------|--------------------------|------|------|------|
| FTEEIPLK         | surrogate standard | IGF2BP3   | IGF2BP3 IMP3 KOC1 VICKZ3 | 2.30 | 1.72 | 2.12 |
| ITISPLQELTYLNP   | isotopic standard  | IGF2BP3   | IGF2BP3 IMP3 KOC1 VICKZ3 | 1.25 | 0.90 | 1.08 |
| QYEAYVQALEGK     | surrogate standard | WTAP      | WTAP KIAA0105            | 0.79 | 0.37 | 1.40 |
| YTDLNSNDVTGLR    | surrogate standard | WTAP      | WTAP KIAA0105            | 1.07 | 0.91 | 1.33 |
| QVQQPSVAQLR      | isotopic standard  | WTAP      | WTAP KIAA0105            | 0.62 | 0.43 | 0.38 |
| GLSYLQLK         | surrogate standard | VIRMA     | KIAA1429 MSTP054         | 0.66 | 0.76 | 0.42 |
| NLDADLVR         | isotopic standard  | RBM15B    | RBM15B OTT3              | 1.39 | 0.85 | 0.95 |
| LQQLALGR         | isotopic standard  | RBM15     | RBM15 OTT OTT1           | 0.96 | 0.71 | 0.36 |
| LAGSELF          | surrogate standard | ZC3H13    | ZC3H13 KIAA0853          | 0.06 | 0.18 | 0.12 |
| FCLQYTR          | surrogate standard | EIF3A     | EIF3A EIF3S10 KIAA0139   | 0.16 | 0.19 | 0.06 |
| VLLATLSIPITPER   | isotopic standard  | EIF3A     | EIF3A EIF3S10 KIAA0139   | 0.58 | 0.69 | 0.46 |
| GTQGVVTFEIFR     | isotopic standard  | EIF3B     | EIF3B EIF3S9             | 1.04 | 1.21 | 0.84 |
| LFIGGLSFETTEESLR | surrogate standard | HNRNPA2B1 | HNRNPA2B1 HNRPA2B1       | 0.67 | 0.45 | 1.74 |
| IDTIEITDR        | isotopic standard  | HNRNPA2B1 | HNRNPA2B1 HNRPA2B1       | 2.32 | 1.76 | 2.60 |
| TLETVPLER        | surrogate standard | HNRNPA2B1 | HNRNPA2B1 HNRPA2B1       | 1.31 | 1.26 | 1.55 |
| GFAFVQYVNER      | isotopic standard  | HNRNPC    | HNRNPC HNRPC             | 0.14 | 0.17 | 0.12 |
| TIEDDLVSALVR     | isotopic standard  | PUS1      | PUS1 PP8985              | 0.34 | 0.19 | 0.49 |
| LSAETLQVNR       | surrogate standard | PUS1      | PUS1 PP8985              | 0.56 | 0.56 | 0.35 |
| GYAPESVLER       | surrogate standard | PUS1      | PUS1 PP8985              | 0.59 | 0.39 | 0.45 |
| AAAAVVAAAAR      | isotopic standard  | TRUB1     | TRUB1 PUS4               | 0.01 | 0.05 | 0.01 |
| GVLVVGIGSGTK     | surrogate standard | TRUB1     | TRUB1 PUS4               | 0.68 | 0.39 | 0.24 |
| EVVAEVR          | isotopic standard  | DKC1      | DKC1 NOLA4               | 0.78 | 0.43 | 1.11 |
| LHNAIEGGTQLSR    | surrogate standard | DKC1      | DKC1 NOLA4               | 1.17 | 0.55 | 0.62 |
| NLAANDLSPSR      | surrogate standard | NSUN4     | NSUN4                    | 1.07 | 0.64 | 0.81 |
| WGELEGDTYDR      | surrogate standard | NSUN4     | NSUN4                    | 0.27 | 0.07 | 0.60 |
| VLVDVPCTTDR      | isotopic standard  | NSUN4     | NSUN4                    | 0.79 | 0.63 | 0.90 |

|                     |                    |         |                                     |      |      |      |
|---------------------|--------------------|---------|-------------------------------------|------|------|------|
| SLGTADVHFER         | surrogate standard | ALYREF  | THOC4                               | 0.98 | 0.68 | 0.72 |
| QYNGVPLDGR          | surrogate standard | ALYREF  | THOC4                               | 1.41 | 1.16 | 1.16 |
| QQLSAEELDAYNAR      | isotopic standard  | ALYREF  | THOC4                               | 1.12 | 0.65 | 1.97 |
| ILAWAPVEPSFSAR      | surrogate standard | PUS3    | PUS3 FKSG32                         | 0.12 | 0.12 | 0.16 |
| DLQAHINHR           | surrogate standard | CBLL1   | CBLL1 HAKAI RNF188                  | 1.84 | 0.43 | 0.89 |
| DSLVLGR             | surrogate standard | CIAO1   | CIAO1 WDR39                         | 2.80 | 4.45 | 2.44 |
| GTLIQGVLR           | surrogate standard | DIS3L2  | DIS3L2 FAM6A                        | 0.47 | 0.44 | 0.11 |
| DYANTLFICR          | surrogate standard | DIS3L2  | DIS3L2 FAM6A                        | 3.46 | 1.98 | 1.53 |
| EGFDSINNR           | surrogate standard | ELP5    | ELP5 C17orf81 DERP6 HSPC002 MSTP071 | 2.92 | 0.09 | 1.58 |
| LACDFLAR            | surrogate standard | FTSJ3   | FTSJ3 SB92                          | 0.02 | 0.10 | 0.02 |
| AANPVDFLSK          | surrogate standard | FTSJ3   | FTSJ3 SB92                          | 0.03 | 0.02 | 0.04 |
| NVGTGLVGAPACGDVMK   | surrogate standard | ISCU    | ISCU NIFUN                          | 2.51 | 1.17 | 1.69 |
| TFGCGSAIASSSLATEWVK | surrogate standard | ISCU    | ISCU NIFUN                          | 0.76 | 0.56 | 0.70 |
| TVEEALTIK           | surrogate standard | ISCU    | ISCU NIFUN                          | 1.47 | 1.42 | 2.00 |
| LDGGFAAVSR          | surrogate standard | METTL17 | METTL17 METT11D1                    | 1.36 | 2.07 | 3.32 |
| YDLPASYK            | surrogate standard | METTL5  | METTL5 DC3 HSPC133                  | 1.24 | 0.03 | 0.81 |
| QNLPLSSGK           | surrogate standard | MPST    | MPST TST2                           | 0.51 | 0.49 | 0.31 |
| SQPAPAEFR           | surrogate standard | MPST    | MPST TST2                           | 1.29 | 1.33 | 0.65 |
| LLDLVQQSCNYK        | surrogate standard | SNU13   | NHP2L1                              | 0.87 | 1.17 | 1.05 |
| NVPYFVFR            | surrogate standard | SNU13   | NHP2L1                              | 1.00 | 2.44 | 1.37 |
| QQIQSIQQSIER        | surrogate standard | SNU13   | NHP2L1                              | 0.46 | 0.34 | 0.38 |
| VPLDPLIGK           | surrogate standard | NUBP1   | NUBP1 NBP NBP1                      | 1.57 | 2.09 | 1.62 |
| GQSFFIDAPDSPATLAYR  | surrogate standard | NUBP1   | NUBP1 NBP NBP1                      | 0.94 | 0.59 | 0.86 |
| TYVTPPGTGFLPGDTAR   | surrogate standard | OSGEP   | OSGEP GCPL1                         | 0.95 | 0.57 | 0.62 |



|                  |                    |        |                           |      |       |      |
|------------------|--------------------|--------|---------------------------|------|-------|------|
| LVELPYTVK        | surrogate standard | OSGEP  | OSGEP GCPL1               | 1.72 | 2.39  | 1.63 |
| TPLSDSGVTQR      | surrogate standard | OSGEP  | OSGEP GCPL1               | 2.12 | 2.16  | 1.32 |
| GPDELEGPDSK      | surrogate standard | PRRC2A | PRRC2A BAT2 G2            | 0.28 | 0.07  | 1.02 |
| SFSGLNSR         | surrogate standard | PRRC2A | PRRC2A BAT2 G2            | 7.57 | 12.59 | 8.76 |
| YLNEQLYSGPSSAAQR | surrogate standard | RRP8   | RRP8 KIAA0409 NML hucep-1 | 2.31 | 0.38  | 2.70 |
| GVDLYVLEK        | surrogate standard | TP53RK | TP53RK C20orf64 PRPK      | 1.69 | 2.11  | 2.11 |
| VTLPGQEEPWDIR    | surrogate standard | URM1   | URM1 C9orf74              | 1.41 | 1.01  | 2.16 |
| GLLATASEDR       | surrogate standard | WDR6   | WDR6                      | 0.85 | 0.71  | 0.76 |
| LGSTVVDLSVPGK    | surrogate standard | YRDC   | YRDC DRIP3 IRIP           | 0.68 | 0.64  | 0.49 |

**Table S1d. LC-PRM quantification results of RWE proteins in whole-cell lysate of *SETD2*<sup>-/-</sup> cells (n = 3) relative to parental HEK293T cells (n = 3).**

| Protein Symbol | SETD2/HEK293T-1 | s.d. | SETD2/HEK293T-2 | s.d. | SETD2/HEK293T-3 | s.d. | Ave. | S.D. | R.S.D. | p-value (one samples t test) |
|----------------|-----------------|------|-----------------|------|-----------------|------|------|------|--------|------------------------------|
| ADAR           | 0.98            |      | 0.84            |      | 0.65            |      | 0.83 | 0.16 | 20%    | 0.208                        |
| ADAT2          | 2.46            |      | 2.71            |      | 1.43            |      | 2.20 | 0.68 | 31%    | 0.092                        |
| ADAT3          | 0.44            | 0.40 | 0.12            | 0.04 | 0.62            | 0.44 | 0.39 | 0.26 | 65%    | 0.055                        |
| BUD23          | 0.20            | 0.15 | 0.09            | 0.09 | 0.20            | 0.22 | 0.16 | 0.07 | 40%    | 0.002                        |
| CDKAL1         | 1.13            | 0.62 | 0.89            | 0.66 | 0.77            | 0.28 | 0.93 | 0.18 | 19%    | 0.585                        |
| CMTR1          | 0.31            | 0.38 | 0.11            | 0.12 | 0.40            | 0.59 | 0.27 | 0.15 | 56%    | 0.014                        |
| CTU1           | 2.63            | 1.62 | 1.33            | 0.08 | 0.70            | 0.27 | 1.55 | 0.98 | 63%    | 0.434                        |
| CTU2           | 0.72            | 0.30 | 0.65            | 0.22 | 0.48            | 0.38 | 0.62 | 0.12 | 20%    | 0.032                        |
| DCPS           | 0.89            |      | 0.44            |      | 0.43            |      | 0.59 | 0.26 | 45%    | 0.111                        |
| DIMT1          | 2.56            |      | 2.70            |      | 1.76            |      | 2.34 | 0.51 | 22%    | 0.045                        |
| DUS1L          | 0.23            | 0.11 | 0.43            | 0.31 | 0.23            | 0.06 | 0.30 | 0.12 | 39%    | 0.009                        |
| DUS3L          | 1.28            | 0.88 | 0.26            | 0.05 | 0.61            | 0.08 | 0.72 | 0.52 | 72%    | 0.444                        |
| EIF5A2         | 0.02            |      | 0.02            |      | 0.02            |      | 0.02 | 0.00 | 15%    | 0.000                        |
| ELP1           | 0.77            | 0.58 | 0.60            | 0.55 | 0.80            | 0.68 | 0.72 | 0.11 | 15%    | 0.050                        |
| ELP3           | 4.42            | 0.54 | 6.88            | 2.50 | 1.18            | 0.50 | 4.16 | 2.86 | 69%    | 0.195                        |
| ELP4           | 4.40            |      | 2.48            |      | 2.08            |      | 2.99 | 1.24 | 41%    | 0.109                        |
| EMG1           | 0.76            | 0.14 | 0.60            | 0.11 | 0.59            | 0.35 | 0.65 | 0.09 | 14%    | 0.022                        |
| FBL            | 0.82            | 0.40 | 0.29            | 0.38 | 0.54            | 0.36 | 0.55 | 0.26 | 48%    | 0.097                        |
| FTSJ1          | 1.03            | 0.23 | 0.48            | 0.10 | 0.67            | 0.28 | 0.73 | 0.28 | 39%    | 0.235                        |
| GTPBP3         | 0.57            |      | 0.32            |      | 0.66            |      | 0.52 | 0.18 | 34%    | 0.042                        |
| HSD17B10       | 1.40            | 0.89 | 1.53            | 1.06 | 1.21            | 0.79 | 1.38 | 0.16 | 11%    | 0.053                        |
| LCMT2          | 0.76            |      | 0.18            |      | 0.89            |      | 0.61 | 0.38 | 62%    | 0.214                        |
| MEPCE          | 1.03            | 1.60 | 0.46            | 0.76 | 0.34            | 0.54 | 0.61 | 0.37 | 60%    | 0.209                        |
| MOCS3          | 0.95            |      | 0.54            |      | 0.99            |      | 0.83 | 0.25 | 30%    | 0.357                        |
| MRM2           | 0.96            |      | 0.56            |      | 0.72            |      | 0.75 | 0.20 | 27%    | 0.166                        |

|         |      |      |      |      |      |      |      |      |     |       |
|---------|------|------|------|------|------|------|------|------|-----|-------|
| MRM3    | 1.67 |      | 1.22 |      | 1.32 |      | 1.41 | 0.24 | 17% | 0.097 |
| MTO1    | 0.68 | 0.94 | 0.58 | 0.78 | 0.62 | 0.87 | 0.63 | 0.05 | 8%  | 0.006 |
| NAT10   | 1.16 | 1.01 | 1.28 | 1.11 | 0.69 | 0.61 | 1.04 | 0.31 | 30% | 0.840 |
| NFS1    | 1.49 | 0.63 | 0.49 | 0.49 | 1.06 | 0.14 | 1.01 | 0.50 | 50% | 0.964 |
| NOP2    | 1.85 | 0.30 | 1.90 | 0.99 | 2.48 | 0.62 | 2.08 | 0.35 | 17% | 0.034 |
| NUDT16  | 0.27 |      | 0.15 |      | 0.20 |      | 0.21 | 0.06 | 30% | 0.002 |
| PCIF1   | 0.71 |      | 0.55 |      | 0.68 |      | 0.65 | 0.09 | 13% | 0.019 |
| QTRT1   | 1.77 | 0.14 | 1.00 | 0.14 | 1.46 | 0.13 | 1.41 | 0.38 | 27% | 0.207 |
| RNGTT   | 0.79 | 0.07 | 0.21 | 0.29 | 0.72 | 0.17 | 0.57 | 0.32 | 55% | 0.143 |
| RNMT    | 0.45 | 0.30 | 0.53 | 0.56 | 0.49 | 0.18 | 0.49 | 0.04 | 8%  | 0.002 |
| RPUSD2  | 1.28 | 1.40 | 0.50 | 0.39 | 0.48 | 0.41 | 0.75 | 0.45 | 60% | 0.444 |
| RPUSD3  | 0.97 | 0.62 | 0.30 | 0.10 | 0.50 | 0.62 | 0.59 | 0.34 | 58% | 0.173 |
| TARBP1  | 0.68 |      | 0.13 |      | 0.27 |      | 0.36 | 0.28 | 79% | 0.060 |
| TFB1M   | 2.77 |      | 3.19 |      | 1.33 |      | 2.43 | 0.98 | 40% | 0.127 |
| TGS1    | 4.80 |      |      |      | 2.02 |      | 3.41 | 1.97 | 58% |       |
| THG1L   | 0.35 | 0.06 |      | 0.23 | 0.41 | 0.29 | 0.38 | 0.04 | 11% |       |
| THUMPD1 | 1.28 | 0.58 | 1.00 | 0.05 | 1.29 | 0.41 | 1.19 | 0.17 | 14% | 0.188 |
| TRIT1   | 0.23 |      | 0.38 |      | 0.23 |      | 0.28 | 0.09 | 31% | 0.005 |
| TRMT1   | 0.43 | 0.34 | 0.30 | 0.25 | 0.51 | 0.42 | 0.41 | 0.11 | 26% | 0.011 |
| TRMT10A | 4.09 |      | 2.36 |      | 1.77 |      | 2.74 | 1.20 | 44% | 0.130 |
| TRMT10C | 0.52 | 0.47 | 0.75 | 0.99 | 0.49 | 0.35 | 0.59 | 0.14 | 24% | 0.037 |
| TRMT11  | 0.40 |      | 0.21 |      | 0.66 |      | 0.42 | 0.23 | 53% | 0.047 |
| TRMT112 | 1.11 | 0.58 | 1.32 | 1.08 | 0.91 | 0.14 | 1.11 | 0.20 | 18% | 0.436 |
| TRMT13  | 1.13 |      | 0.27 |      | 0.86 |      | 0.75 | 0.44 | 58% | 0.432 |
| TRMT2A  | 0.54 |      | 0.83 |      | 0.61 |      | 0.66 | 0.15 | 23% | 0.059 |
| TRMT44  | 0.51 |      | 0.63 |      | 0.65 |      | 0.59 | 0.08 | 13% | 0.011 |
| TRMT5   | 1.13 | 0.23 | 0.30 | 0.38 | 0.94 | 0.13 | 0.79 | 0.44 | 55% | 0.497 |
| TRUB2   | 0.73 | 0.10 | 0.11 | 0.02 | 0.47 | 0.25 | 0.44 | 0.31 | 71% | 0.090 |
| TYW3    | 1.56 |      | 0.82 |      | 0.86 |      | 1.08 | 0.42 | 39% | 0.777 |

|         |      |      |      |      |      |      |      |      |     |       |
|---------|------|------|------|------|------|------|------|------|-----|-------|
| WDR4    | 2.83 | 2.24 | 1.54 | 0.78 | 1.53 | 0.48 | 1.97 | 0.75 | 38% | 0.154 |
| YBX1    | 0.89 | 0.44 | 0.48 | 0.71 | 1.25 | 0.40 | 0.87 | 0.39 | 44% | 0.628 |
| RBMX    | 1.48 | 1.45 | 0.59 | 0.70 | 1.04 | 0.89 | 1.03 | 0.44 | 43% | 0.906 |
| ELAVL1  | 1.18 | 0.32 | 0.94 | 0.16 | 1.08 | 0.27 | 1.07 | 0.12 | 11% | 0.429 |
| SND1    | 1.63 | 0.99 | 1.05 | 1.15 | 0.99 | 0.68 | 1.22 | 0.35 | 29% | 0.390 |
| FMR1    | 0.61 | 0.16 | 0.14 | 0.09 | 1.18 | 0.36 | 0.64 | 0.52 | 81% | 0.360 |
| LRPPRC  | 0.73 | 1.03 | 0.95 | 1.31 | 0.67 | 0.83 | 0.78 | 0.15 | 19% | 0.126 |
| PUS7L   | 1.23 | 0.52 | 0.63 | 0.33 | 0.61 | 0.55 | 0.83 | 0.35 | 43% | 0.482 |
| ALKBH1  | 1.27 | 0.46 | 1.45 | 0.02 | 0.97 | 0.39 | 1.23 | 0.25 | 20% | 0.247 |
| ALKBH4  | 0.68 |      | 0.54 |      | 0.88 |      | 0.70 | 0.17 | 25% | 0.093 |
| ALKBH5  | 1.18 |      | 0.97 |      | 0.88 |      | 1.01 | 0.16 | 15% | 0.905 |
| ALKBH6  | 2.56 |      | 4.47 |      | 2.44 |      | 3.16 | 1.14 | 36% | 0.081 |
| FTO     | 0.90 | 0.19 | 0.94 | 0.73 | 0.77 | 0.39 | 0.87 | 0.09 | 11% | 0.138 |
| YTHDF1  | 2.96 | 1.96 | 1.14 | 1.05 | 2.50 | 0.72 | 2.20 | 0.95 | 43% | 0.159 |
| YTHDF2  | 2.85 | 2.13 | 1.17 | 1.10 | 2.27 | 0.26 | 2.10 | 0.85 | 41% | 0.155 |
| YTHDF3  | 2.10 | 1.02 | 1.28 | 0.60 | 1.44 | 0.70 | 1.61 | 0.43 | 27% | 0.137 |
| YTHDC1  | 0.35 |      | 0.29 |      | 0.34 |      | 0.33 | 0.03 | 9%  | 0.001 |
| YTHDC2  | 0.21 | 0.13 | 0.16 | 0.12 | 0.13 | 0.11 | 0.17 | 0.04 | 26% | 0.001 |
| METTL3  | 2.17 | 1.03 | 1.91 | 0.66 | 1.65 | 0.61 | 1.91 | 0.26 | 14% | 0.027 |
| METTL14 | 3.21 |      | 4.33 |      | 7.43 |      | 4.99 | 2.19 | 44% | 0.087 |
| METTL1  | 0.37 | 0.39 | 0.32 | 0.29 | 0.22 | 0.17 | 0.31 | 0.07 | 25% | 0.004 |
| METTL16 | 2.96 |      | 5.91 |      | 2.23 |      | 3.70 | 1.95 | 53% | 0.138 |
| METTL2B | 1.01 |      | 0.18 |      | 0.79 |      | 0.66 | 0.43 | 65% | 0.307 |
| NSUN2   | 0.58 | 0.75 | 0.07 | 0.01 | 0.41 | 0.50 | 0.35 | 0.26 | 74% | 0.050 |
| NSUN5   | 1.35 | 0.20 | 0.30 | 0.16 | 1.16 | 0.44 | 0.93 | 0.56 | 60% | 0.859 |
| NSUN6   | 1.93 | 1.27 | 0.60 | 0.07 | 0.54 | 0.19 | 1.03 | 0.79 | 77% | 0.961 |
| TRMT61A | 0.68 | 0.19 | 0.90 | 0.80 | 0.33 | 0.26 | 0.63 | 0.29 | 45% | 0.159 |
| TRMT61B | 2.98 |      | 0.00 |      | 1.65 |      | 1.54 | 1.49 | 97% | 0.593 |
| TRMT6   | 0.09 | 0.02 | 0.07 | 0.04 | 0.14 | 0.10 | 0.10 | 0.04 | 36% | 0.001 |

|           |      |      |      |      |      |      |      |      |     |       |
|-----------|------|------|------|------|------|------|------|------|-----|-------|
| PUS7      | 0.40 | 0.45 | 0.45 | 0.53 | 0.17 | 0.19 | 0.34 | 0.15 | 44% | 0.017 |
| IGF2BP1   | 1.42 | 1.16 | 0.43 | 0.24 | 0.86 | 0.14 | 0.90 | 0.49 | 55% | 0.766 |
| IGF2BP2   | 1.13 | 0.70 | 0.55 | 0.07 | 1.00 | 0.12 | 0.90 | 0.30 | 34% | 0.609 |
| IGF2BP3   | 1.77 | 0.74 | 1.31 | 0.58 | 1.60 | 0.74 | 1.56 | 0.23 | 15% | 0.053 |
| WTAP      | 0.83 | 0.23 | 0.57 | 0.30 | 1.04 | 0.57 | 0.81 | 0.23 | 29% | 0.295 |
| VIRMA     | 0.66 |      | 0.76 |      | 0.42 |      | 0.61 | 0.17 | 28% | 0.062 |
| RBM15B    | 1.39 |      | 0.85 |      | 0.95 |      | 1.07 | 0.29 | 27% | 0.732 |
| RBM15     | 0.96 |      | 0.71 |      | 0.36 |      | 0.68 | 0.30 | 44% | 0.204 |
| ZC3H13    | 0.06 |      | 0.18 |      | 0.12 |      | 0.12 | 0.06 | 47% | 0.001 |
| EIF3A     | 0.37 | 0.30 | 0.44 | 0.36 | 0.26 | 0.28 | 0.36 | 0.09 | 26% | 0.007 |
| EIF3B     | 1.04 |      | 1.21 |      | 0.84 |      | 1.03 | 0.19 | 18% | 0.797 |
| HNRNPA2B1 | 1.43 | 0.83 | 1.15 | 0.66 | 1.97 | 0.56 | 1.52 | 0.41 | 27% | 0.162 |
| HNRNPC    | 0.14 |      | 0.17 |      | 0.12 |      | 0.14 | 0.03 | 20% | 0.000 |
| PUS1      | 0.50 | 0.13 | 0.38 | 0.18 | 0.43 | 0.07 | 0.44 | 0.06 | 13% | 0.004 |
| TRUB1     | 0.35 | 0.48 | 0.22 | 0.24 | 0.12 | 0.16 | 0.23 | 0.11 | 48% | 0.007 |
| DKC1      | 0.98 | 0.28 | 0.49 | 0.09 | 0.87 | 0.35 | 0.78 | 0.26 | 33% | 0.269 |
| NSUN4     | 0.71 | 0.40 | 0.45 | 0.33 | 0.77 | 0.15 | 0.64 | 0.17 | 27% | 0.068 |
| ALYREF    | 1.17 | 0.22 | 0.83 | 0.29 | 1.28 | 0.64 | 1.09 | 0.24 | 22% | 0.560 |
| PUS3      | 0.12 |      | 0.12 |      | 0.16 |      | 0.13 | 0.02 | 18% | 0.000 |
| CBLL1     | 1.84 |      | 0.43 |      | 0.89 |      | 1.05 | 0.72 | 68% | 0.912 |
| CIAO1     | 2.80 |      | 4.45 |      | 2.44 |      | 3.23 | 1.07 | 33% | 0.069 |
| DIS3L2    | 1.97 | 2.11 | 1.21 | 1.09 | 0.82 | 1.00 | 1.33 | 0.58 | 43% | 0.424 |
| ELP5      | 2.92 |      | 0.09 |      | 1.58 |      | 1.53 | 1.42 | 93% | 0.584 |
| FTSJ3     | 0.03 | 0.01 | 0.06 | 0.06 | 0.03 | 0.01 | 0.04 | 0.02 | 52% | 0.000 |
| ISCU      | 1.58 | 0.88 | 1.05 | 0.44 | 1.47 | 0.68 | 1.37 | 0.28 | 20% | 0.151 |
| METTL17   | 1.36 |      | 2.07 |      | 3.32 |      | 2.25 | 0.99 | 44% | 0.160 |
| METTL5    | 1.24 |      | 0.03 |      | 0.81 |      | 0.69 | 0.61 | 88% | 0.477 |
| MPST      | 0.90 | 0.55 | 0.91 | 0.60 | 0.48 | 0.24 | 0.77 | 0.25 | 32% | 0.242 |
| SNU13     | 0.78 | 0.28 | 1.32 | 1.06 | 0.93 | 0.51 | 1.01 | 0.28 | 28% | 0.961 |

|        |      |      |      |      |      |      |      |      |     |       |
|--------|------|------|------|------|------|------|------|------|-----|-------|
| NUBP1  | 1.25 | 0.44 | 1.34 | 1.06 | 1.24 | 0.54 | 1.28 | 0.05 | 4%  | 0.012 |
| OSGEP  | 1.60 | 0.59 | 1.71 | 0.99 | 1.19 | 0.52 | 1.50 | 0.27 | 18% | 0.087 |
| PRRC2A | 3.93 | 5.15 | 6.33 | 8.85 | 4.89 | 5.47 | 5.05 | 1.21 | 24% | 0.028 |
| RRP8   | 2.31 |      | 0.38 |      | 2.70 |      | 1.80 | 1.24 | 69% | 0.383 |
| TP53RK | 1.69 |      | 2.11 |      | 2.11 |      | 1.97 | 0.24 | 12% | 0.020 |
| URM1   | 1.41 |      | 1.01 |      | 2.16 |      | 1.53 | 0.58 | 38% | 0.257 |
| WDR6   | 0.85 |      | 0.71 |      | 0.76 |      | 0.77 | 0.07 | 9%  | 0.029 |
| YRDC   | 0.68 |      | 0.64 |      | 0.49 |      | 0.60 | 0.10 | 17% | 0.022 |

**Table S1e. LC-PRM quantification results of tryptic peptides from RWE proteins in whole-cell lysate of *KAT5*<sup>-/-</sup> cells (n = 3) relative to parental HEK293T cells (n = 3).**

| Peptide                    | standard type      | Protein Symbol | Protein Gene                     | KAT5_KO/HEK293T<br>-1 | KAT5_KO/HEK293T<br>-2 | KAT5_KO/HEK293T<br>-3 |
|----------------------------|--------------------|----------------|----------------------------------|-----------------------|-----------------------|-----------------------|
| YLNTNPVGGLLLEYAR           | surrogate standard | ADAR           | ADAR ADAR1 DSRAD G1P1 IFI4       | 1.88                  | 0.92                  | 0.79                  |
| VLIGENEK                   | surrogate standard | ADAR           | ADAR ADAR1 DSRAD G1P1 IFI4       | 0.73                  | 0.47                  | 0.72                  |
| DGSAFEDGLR                 | surrogate standard | ADAR           | ADAR ADAR1 DSRAD G1P1 IFI4       | 3.23                  | 1.13                  | 3.02                  |
| IPLVVYGCQNER               | surrogate standard | ADAT2          | ADAT2 DEADC1                     | 2.06                  | 2.60                  | 1.45                  |
| AVGAVVVDPASDR              | surrogate standard | ADAT3          | ADAT3 TAD3                       | 0.73                  | 0.55                  | 0.43                  |
| VFYGAPSPDGALGTR            | surrogate standard | ADAT3          | ADAT3 TAD3                       | 0.26                  | 0.32                  | 0.22                  |
| GVLEEQCR                   | surrogate standard | ADAT3          | ADAT3 TAD3                       | 0.68                  | 0.42                  | 0.73                  |
| AVLQLYPENSEQLELITTKA<br>TK | surrogate standard | BUD23          | WBSCR22 MERM1 HUSSY-03 PP3381    | 1.21                  | 0.23                  | 0.57                  |
| AGFSGGMVVVDYPNSAK          | surrogate standard | BUD23          | WBSCR22 MERM1 HUSSY-03 PP3381    | 0.39                  | 0.31                  | 0.20                  |
| ESVFTNER                   | surrogate standard | BUD23          | WBSCR22 MERM1 HUSSY-03 PP3381    | 0.28                  | 0.31                  | 0.11                  |
| VIFPDAEMEDVNNPGLR          | surrogate standard | CDK5RAP1       | CDK5RAP1 C20orf34 CGI-05 HSPC167 | 2.15                  | 0.62                  | 1.16                  |
| ITSASSQTLR                 | surrogate standard | CDK5RAP1       | CDK5RAP1 C20orf34 CGI-05 HSPC167 | 6.26                  | 2.31                  | 0.15                  |
| VVEVVEETIK                 | surrogate standard | CDKAL1         | CDKAL1                           | 2.51                  | 1.18                  | 0.92                  |
| GNLASYPIDELVDR             | surrogate standard | CDKAL1         | CDKAL1                           | 1.57                  | 0.49                  | 0.73                  |
| DIGNLPTLLWK                | surrogate standard | CDKAL1         | CDKAL1                           | 2.18                  | 0.91                  | 0.69                  |
| GFGMTLK                    | surrogate standard | CMTR1          | CMTR1 FTSJD2 KIAA0082 MTR1       | 0.20                  | 0.33                  | 0.34                  |
| NTSDVDNLVVPLEVIK           | surrogate standard | CMTR1          | CMTR1 FTSJD2 KIAA0082 MTR1       | 1.69                  | 0.37                  | 1.61                  |
| SQIYTDWGR                  | surrogate standard | CMTR1          | CMTR1 FTSJD2 KIAA0082 MTR1       | 0.08                  | 0.20                  | 0.03                  |
| DSTVLAHVLR                 | surrogate standard | CTU1           | CTU1 ATPBD3 NCS6                 | 3.99                  | 2.44                  | 0.13                  |
| GGGLGSPGEGGALPR            | surrogate standard | CTU1           | CTU1 ATPBD3 NCS6                 | 1.10                  | 1.76                  | 0.64                  |
| EELLQTLR                   | surrogate standard | CTU2           | CTU2                             | 1.02                  | 1.11                  | 1.01                  |

|                      |                    |          |                                        |      |       |      |
|----------------------|--------------------|----------|----------------------------------------|------|-------|------|
| LQTQFPSTVSTVYR       | surrogate standard | CTU2     | CTU2                                   | 0.38 | 1.16  | 0.27 |
| NILHQGQEAILQR        | surrogate standard | DCPS     | DCPS DCS1 HINT5 HSPC015                | 0.45 | 0.48  | 0.13 |
| NPLIINSIIDK          | surrogate standard | DIMT1    | DIMT1 DIMT1L HUSSY-05                  | 1.69 | 2.23  | 1.90 |
| LQGFEFWSR            | surrogate standard | DUS1L    | DUS1L                                  | 0.84 | 0.54  | 0.41 |
| LSVPVTCK             | surrogate standard | DUS1L    | DUS1L                                  | 0.56 | 1.43  | 0.31 |
| YLETKPADLGPR         | surrogate standard | DUS3L    | DUS3L                                  | 1.89 | 0.72  | 0.21 |
| GTQPPSIR             | surrogate standard | DUS3L    | DUS3L                                  | 2.20 | 0.75  | 0.28 |
| TCGPLTDEDVVR         | surrogate standard | DUS3L    | DUS3L                                  | 0.82 | 0.60  | 0.84 |
| NGFVVLK              | surrogate standard | EIF5A2   | EIF5A2                                 | 0.10 | 0.56  | 0.08 |
| NEVSLVAEGFLPEDGSGR   | surrogate standard | ELP1     | IKBKAP ELP1 IKAP                       | 1.92 | 0.46  | 1.51 |
| VLVTVFR              | surrogate standard | ELP1     | IKBKAP ELP1 IKAP                       | 0.09 | 0.31  | 0.10 |
| DQLVGLGR             | surrogate standard | ELP1     | IKBKAP ELP1 IKAP                       | 0.94 | 1.96  | 1.42 |
| YDPFLQTR             | surrogate standard | ELP3     | ELP3                                   | 4.42 | 6.01  | 1.62 |
| LYPTLVIR             | surrogate standard | ELP3     | ELP3                                   | 3.89 | 12.23 | 1.16 |
| VEPCSLTPGYTK         | surrogate standard | ELP4     | ELP4 C11orf19 PAXNEB                   | 2.72 | 2.76  | 1.55 |
| TYELLNCDK            | surrogate standard | EMG1     | EMG1 C2F                               | 1.05 | 0.74  | 0.64 |
| VGTSFSIPVVS DVR      | surrogate standard | EMG1     | EMG1 C2F                               | 0.68 | 0.83  | 0.49 |
| VSVEYTEK             | surrogate standard | EMG1     | EMG1 C2F                               | 0.45 | 0.93  | 0.37 |
| NVMVEPHR             | surrogate standard | FBL      | FBL FIB1 FLRN                          | 1.66 | 0.30  | 0.16 |
| NLVPGESVYGEK         | surrogate standard | FBL      | FBL FIB1 FLRN                          | 0.72 | 0.61  | 0.98 |
| AVDLCAAPGWSQVLSQK    | surrogate standard | FTSJ1    | FTSJ1 JM23                             | 2.03 | 0.69  | 0.64 |
| SYPLDLEGGSEYK        | surrogate standard | FTSJ1    | FTSJ1 JM23                             | 1.40 | 0.78  | 0.98 |
| DLALAAEALR           | surrogate standard | GTPBP3   | GTPBP3 MTGP1                           | 0.78 | 0.59  | 0.80 |
| GLVAVITGGASGLGLATAER | surrogate standard | HSD17B10 | HSD17B10 ERAB HADH2 MRPP2 SCHAD XH98G2 | 0.91 | 0.32  | 0.62 |



|                  |                    |          |                                        |      |      |      |
|------------------|--------------------|----------|----------------------------------------|------|------|------|
| DVQ TALALAK      | surrogate standard | HSD17B10 | HSD17B10 ERAB HADH2 MRPP2 SCHAD XH98G2 | 1.69 | 1.92 | 1.65 |
| VCN FLASQVFPFSR  | surrogate standard | HSD17B10 | HSD17B10 ERAB HADH2 MRPP2 SCHAD XH98G2 | 0.61 | 1.21 | 0.87 |
| IPVEGEVPEAR      | surrogate standard | LCMT2    | LCMT2 KIAA0547 TYW4                    | 1.53 | 0.69 | 1.11 |
| NSCNVGGGGGFK     | surrogate standard | MEPCE    | MEPCE BCDIN3                           | 0.38 | 0.10 | 0.00 |
| FQYGYCK          | surrogate standard | MEPCE    | MEPCE BCDIN3                           | 3.87 | 6.58 | 1.54 |
| SCFPASLTASR      | surrogate standard | MEPCE    | MEPCE BCDIN3                           | 0.03 | 0.04 | 0.01 |
| LASALLAEQEPQPER  | surrogate standard | MOCS3    | MOCS3 UBA4                             | 1.01 | 0.64 | 1.02 |
| ILEVLPGR         | surrogate standard | MRM2     | FTSJ2 FJH1 MRM2                        | 1.52 | 1.48 | 0.61 |
| APSTWEESGLR      | surrogate standard | MRM3     | RNMTL1 MRM3 HC90                       | 1.57 | 1.13 | 1.07 |
| LGFVVGR          | surrogate standard | MTO1     | MTO1 CGI-02                            | 0.35 | 0.73 | 0.41 |
| LIPEASISTSR      | surrogate standard | MTO1     | MTO1 CGI-02                            | 2.00 | 1.78 | 1.14 |
| LDYLGVSYGLTPR    | surrogate standard | NAT10    | NAT10 ALP KIAA1709                     | 1.00 | 1.16 | 0.85 |
| AGPNASIILK       | surrogate standard | NAT10    | NAT10 ALP KIAA1709                     | 1.33 | 2.36 | 0.56 |
| SLEAEGFQVTYLPVQK | surrogate standard | NFS1     | NFS1 NIFS HUSSY-08                     | 1.01 | 0.58 | 0.97 |
| VEALQSGGGQER     | surrogate standard | NFS1     | NFS1 NIFS HUSSY-08                     | 1.92 | 0.11 | 0.25 |
| AIGTDEDLAHSSIR   | surrogate standard | NFS1     | NFS1 NIFS HUSSY-08                     | 1.06 | 0.93 | 0.70 |
| IQDIVGILR        | surrogate standard | NOP2     | NOP2 NOL1 NSUN1                        | 1.48 | 1.85 | 2.61 |
| DLAQALINR        | surrogate standard | NOP2     | NOP2 NOL1 NSUN1                        | 0.70 | 1.49 | 1.92 |
| GADSELSTVPSVTK   | surrogate standard | NOP2     | NOP2 NOL1 NSUN1                        | 1.35 | 0.84 | 1.69 |
| GTDTQTPAVLSPSK   | surrogate standard | NOP2     | NOP2 NOL1 NSUN1                        | 1.49 | 1.09 | 1.62 |
| LGFPGGFVDTQDR    | surrogate standard | NUDT16   | NUDT16                                 | 0.58 | 0.68 | 0.72 |
| LQELSAAYR        | surrogate standard | PCIF1    | PCIF1                                  | 0.55 | 0.98 | 0.73 |
| GITTEQLDALGCR    | surrogate standard | QTRT1    | QTRT1 TGT TGUT                         | 1.75 | 1.32 | 1.24 |
| SPYDGNETLLSPEK   | surrogate standard | QTRT1    | QTRT1 TGT TGUT                         | 1.75 | 0.83 | 1.42 |

|                     |                    |         |                       |      |      |      |
|---------------------|--------------------|---------|-----------------------|------|------|------|
| FNSQPVGDGDFNVR      | surrogate standard | RNGTT   | RNGTT CAP1A           | 0.47 | 0.59 | 0.65 |
| SVLIGEFLEK          | surrogate standard | RNMT    | RNMT KIAA0398         | 0.85 | 0.78 | 0.93 |
| TFLEFYEEK           | surrogate standard | RNMT    | RNMT KIAA0398         | 0.44 | 0.33 | 0.74 |
| LPLGTLISK           | surrogate standard | RNMT    | RNMT KIAA0398         | 0.79 | 1.18 | 0.71 |
| AQPLAYYEAAVR        | surrogate standard | RPUSD2  | RPUSD2 C15orf19       | 0.61 | 0.89 | 0.90 |
| GKPCETVFQR          | surrogate standard | RPUSD2  | RPUSD2 C15orf19       | 2.74 | 1.54 | 0.31 |
| LSYNGQSSVVR         | surrogate standard | RPUSD2  | RPUSD2 C15orf19       | 0.11 | 0.17 | 0.02 |
| VGTVLGQR            | surrogate standard | RPUSD3  | RPUSD3                | 0.38 | 2.38 | 0.03 |
| DTPVELLAPLPYFSR     | surrogate standard | RPUSD3  | RPUSD3                | 2.53 | 0.25 | 0.94 |
| GSGGAGALPEAAR       | surrogate standard | TARBP1  | TARBP1 TRM3 TRP185    | 0.37 | 0.27 | 0.12 |
| DGPFVYGR            | surrogate standard | TFB1M   | TFB1M CGI-75          | 2.62 | 2.74 | 1.24 |
| DYFEDQPLLYPPGFDGR   | surrogate standard | THG1L   | THG1L ICF45           | 0.75 | 0.00 | 0.32 |
| VVYPSNQTLK          | surrogate standard | THG1L   | THG1L ICF45           | 0.18 | 1.08 | 0.17 |
| ELAGIVCTLNSENK      | surrogate standard | THUMPD1 | THUMPD1               | 0.92 | 0.79 | 1.29 |
| AVCCLSVVK           | surrogate standard | THUMPD1 | THUMPD1               | 0.82 | 1.29 | 0.92 |
| STLALQLGQR          | surrogate standard | TRIT1   | TRIT1 IPT MOD5        | 2.57 | 0.16 | 0.14 |
| IAFPSANEVFYNPVQEFNR | surrogate standard | TRMT1   | TRMT1                 | 0.39 | 0.22 | 0.13 |
| DLTCAVITEFAR        | surrogate standard | TRMT1   | TRMT1                 | 1.60 | 0.38 | 0.84 |
| FALEVPLR            | surrogate standard | TRMT1   | TRMT1                 | 0.22 | 0.79 | 0.24 |
| DVHSTLR             | surrogate standard | TRMT10A | TRMT10A RG9MTD2       | 2.75 | 2.08 | 0.77 |
| IPAVTYPK            | surrogate standard | TRMT10C | TRMT10C MRPP1 RG9MTD1 | 0.98 | 2.10 | 0.74 |
| EVPEHITEEELK        | surrogate standard | TRMT10C | TRMT10C MRPP1 RG9MTD1 | 0.85 | 0.53 | 0.88 |
| LLTSTEK             | surrogate standard | TRMT10C | TRMT10C MRPP1 RG9MTD1 | 0.23 | 0.42 | 0.15 |
| IDALEFLPFEGK        | surrogate standard | TRMT11  | TRMT11 C6orf75 MDS024 | 1.07 | 0.17 | 0.58 |

|                       |                    |         |                                |      |      |      |
|-----------------------|--------------------|---------|--------------------------------|------|------|------|
| ICPVEFNPNFVAR         | surrogate standard | TRMT112 | TRMT112 AD-001 HSPC152 HSPC170 | 1.07 | 1.54 | 1.13 |
| GPVEGYEENEEFLR        | surrogate standard | TRMT112 | TRMT112 AD-001 HSPC152 HSPC170 | 0.55 | 0.39 | 0.98 |
| ILCPLDPK              | surrogate standard | TRMT13  | TRMT13 CCDC76                  | 2.42 | 3.52 | 0.81 |
| HTVYEDQLAK            | surrogate standard | TRMT13  | TRMT13 CCDC76                  | 2.83 | 0.38 | 0.15 |
| AEDLVPTLVSR           | surrogate standard | TRMT2A  | TRMT2A HTF9C                   | 0.42 | 0.91 | 0.95 |
| AVLPEGQDVTSGFSR       | surrogate standard | TRMT5   | TRMT5 KIAA1393 TRM5            | 1.02 | 0.81 | 0.73 |
| DANPAEDVR             | surrogate standard | TRMT5   | TRMT5 KIAA1393 TRM5            | 3.36 | 0.04 | 0.46 |
| DGFFTLDSALLR          | surrogate standard | TRUB2   | TRUB2                          | 1.01 | 0.07 | 0.24 |
| AATPQVAEELEK          | surrogate standard | TRUB2   | TRUB2                          | 0.72 | 0.27 | 0.19 |
| DQFFTTSSCAGR          | surrogate standard | TYW3    | TYW3 C1orf171                  | 1.88 | 1.19 | 0.93 |
| CTALTFIASEEK          | surrogate standard | WDR4    | WDR4                           | 2.41 | 1.44 | 1.36 |
| ISVVPTQPGLLLSSSGDGLR  | surrogate standard | WDR4    | WDR4                           | 2.63 | 1.61 | 1.10 |
| GAEAAANTGPGGVPVQGSK   | surrogate standard | YBX1    | YBX1 NSEP1 YB1                 | 0.87 | 0.89 | 1.55 |
| NEGSESAPEGQAQQR       | surrogate standard | YBX1    | YBX1 NSEP1 YB1                 | 1.21 | 0.06 | 0.60 |
| AADPPAENS SAPEAEQGGAE | surrogate standard | YBX1    | YBX1 NSEP1 YB1                 | 0.22 | 0.17 | 1.71 |
| ALEAVFGK              | surrogate standard | RBMX    | RBMX HNRPG RBMXP1              | 1.48 | 1.57 | 1.71 |
| SAPSGPVR              | surrogate standard | RBMX    | RBMX HNRPG RBMXP1              | 2.37 | 0.58 | 0.02 |
| SDLYSSGR              | surrogate standard | RBMX    | RBMX HNRPG RBMXP1              | 3.05 | 0.56 | 0.64 |
| SLFSSIGEVESAK         | surrogate standard | ELAVL1  | HuR                            | 1.58 | 1.43 | 1.68 |
| DVEDMFSR              | surrogate standard | ELAVL1  | HuR                            | 1.32 | 0.70 | 1.65 |
| VLVDQTTGLSR           | surrogate standard | ELAVL1  | HuR                            | 1.22 | 1.63 | 1.08 |
| YTENPR                | surrogate standard | SND1    | SND1 TDRD11                    | 1.23 | 1.18 | 0.87 |
| EVLPRSTR              | surrogate standard | SND1    | SND1 TDRD11                    | 3.04 | 0.44 | 0.44 |
| LGTLSPAFSTR           | surrogate standard | SND1    | SND1 TDRD11                    | 0.56 | 1.83 | 0.39 |

|                   |                    |        |                       |      |      |      |
|-------------------|--------------------|--------|-----------------------|------|------|------|
| DINESDEVEVYSR     | surrogate standard | FMR1   | FMR1                  | 0.63 | 0.11 | 1.06 |
| SFLEFAEDVIQVPR    | surrogate standard | FMR1   | FMR1                  | 1.10 | 0.13 | 0.80 |
| IPENIYR           | surrogate standard | LRPPRC | LRPPRC LRP130         | 1.28 | 1.98 | 1.13 |
| LQWFCDR           | surrogate standard | LRPPRC | LRPPRC LRP130         | 0.08 | 0.19 | 0.04 |
| LDLQNLILEDGR      | surrogate standard | PUS7L  | PUS7L                 | 1.13 | 1.06 | 1.05 |
| FGNLVETK          | surrogate standard | PUS7L  | PUS7L                 | 3.23 | 1.48 | 0.53 |
| LNIPGCYR          | surrogate standard | PUS7L  | PUS7L                 | 1.91 | 0.04 | 0.07 |
| AEAGILNYR         | isotopic standard  | ALKBH1 | ALKBH1 ABH ABH1 ALKBH | 0.99 | 1.38 | 0.92 |
| SLLVLTGAAR        | surrogate standard | ALKBH4 | ALKBH4 ABH4           | 0.74 | 1.65 | 0.78 |
| ELSAEFGPGGR       | isotopic standard  | ALKBH4 | ALKBH4 ABH4           | 0.60 | 0.58 | 0.81 |
| LFSQDECAK         | surrogate standard | ALKBH5 | ALKBH5 ABH5 OFOXD1    | 1.86 | 0.68 | 1.13 |
| VSEPVLSLPVR       | isotopic standard  | ALKBH5 | ALKBH5 ABH5 OFOXD1    | 1.77 | 2.14 | 1.58 |
| VPALPEFR          | isotopic standard  | ALKBH6 | ALKBH6 ABH6           | 2.02 | 3.48 | 1.97 |
| ILIGNPGCTYK       | surrogate standard | FTO    | FTO KIAA1752          | 1.27 | 1.85 | 0.86 |
| EGLPVEQR          | surrogate standard | FTO    | FTO KIAA1752          | 0.73 | 1.10 | 0.50 |
| SGPVMGGGLPPPIK    | surrogate standard | YTHDF1 | YTHDF1                | 3.32 | 1.98 | 1.79 |
| SPVDYGTSAGVWSQDK  | isotopic standard  | YTHDF1 | YTHDF1                | 1.25 | 0.54 | 1.37 |
| DGLNDDDFEPYLSPQAR | isotopic standard  | YTHDF2 | YTHDF2 HGRG8          | 2.52 | 0.72 | 3.07 |
| LGSTEVASNVPK      | surrogate standard | YTHDF2 | YTHDF2 HGRG8          | 1.28 | 2.51 | 3.26 |
| DVPNSQLR          | surrogate standard | YTHDF2 | YTHDF2 HGRG8          | 7.30 | 0.85 | 0.88 |
| AITDGQAGFGNDTSLK  | isotopic standard  | YTHDF3 | YTHDF3                | 1.59 | 1.31 | 1.77 |
| VPGISSIEQGMTGLK   | isotopic standard  | YTHDF3 | YTHDF3                | 2.63 | 1.86 | 1.85 |
| GNVGIGGSAPPPPIK   | isotopic standard  | YTHDF3 | YTHDF3                | 1.22 | 1.75 | 0.86 |
| GVWSTLPVNEK       | isotopic standard  | YTHDC1 | YTHDC1 KIAA1966 YT521 | 0.26 | 0.66 | 0.43 |
| LSQSLGLVSK        | surrogate standard | YTHDC2 | YTHDC2                | 0.42 | 1.37 | 0.29 |
| VVLIVGETGSGK      | isotopic standard  | YTHDC2 | YTHDC2                | 0.82 | 0.88 | 0.33 |

|                |                    |         |                               |      |      |      |
|----------------|--------------------|---------|-------------------------------|------|------|------|
| NPEAALSPTFR    | isotopic standard  | METTL3  | METTL3 MTA70                  | 2.24 | 2.88 | 1.56 |
| YLDVSILGK      | surrogate standard | METTL3  | METTL3 MTA70                  | 1.60 | 1.90 | 1.19 |
| VDEIIVVK       | surrogate standard | METTL3  | METTL3 MTA70                  | 2.34 | 2.40 | 2.39 |
| LEIDEIAAPR     | isotopic standard  | METTL14 | METTL14 KIAA1627              | 4.32 | 9.79 | 9.86 |
| VSDYVQDR       | surrogate standard | METTL1  | METTL1 C12orf1                | 0.67 | 0.41 | 0.31 |
| AAPAGGFQNIACLR | isotopic standard  | METTL1  | METTL1 C12orf1                | 0.07 | 0.20 | 0.07 |
| NFPAIFR        | surrogate standard | METTL1  | METTL1 C12orf1                | 0.37 | 1.01 | 0.30 |
| LPGVAGQYLFK    | surrogate standard | METTL16 | METTL16 METT10D               | 2.31 | 4.44 | 2.02 |
| TQTPPVEENVTK   | isotopic standard  | METTL2B | METTL2B                       | 1.05 | 0.68 | 0.59 |
| QNPLYDTER      | isotopic standard  | METTL6  | METTL6                        | 0.60 | 0.21 | 0.04 |
| GAEQLAEGGR     | surrogate standard | NSUN2   | NSUN2 SAKI TRM4               | 1.99 | 0.19 | 0.31 |
| ILLTQENPFFR    | surrogate standard | NSUN2   | NSUN2 SAKI TRM4               | 0.21 | 0.29 | 0.19 |
| QLEPGAGTSPVVR  | surrogate standard | NSUN5   | NSUN5 NSUN5A WBSCR20 WBSCR20A | 1.68 | 0.76 | 1.11 |
| DALQQNPGAFR    | surrogate standard | NSUN5   | NSUN5 NSUN5A WBSCR20 WBSCR20A | 0.18 | 0.60 | 0.68 |
| EVASYQLQR      | isotopic standard  | NSUN6   | NSUN6 NOPD1                   | 1.60 | 1.41 | 1.09 |
| GAGLSCEQLK     | surrogate standard | NSUN6   | NSUN6 NOPD1                   | 5.90 | 1.73 | 0.49 |
| FFLLENVR       | isotopic standard  | DNMT1   | DNMT1 AIM CXXC9 DNMT          | 0.08 | 0.06 | 0.09 |
| FCSFSPCIEVQR   | surrogate standard | TRMT61A | TRMT61A                       | 0.44 | 0.72 | 0.24 |
| TCQALAAAR      | isotopic standard  | TRMT61A | TRMT61A                       | 0.59 | 1.11 | 0.08 |
| HSVDLIGR       | surrogate standard | TRMT61A | TRMT61A                       | 0.36 | 0.95 | 0.26 |
| INTDVQLDSQEK   | surrogate standard | TRMT61B | TRMT61B                       | 4.21 | 0.26 | 0.70 |
| AATACFGFPK     | isotopic standard  | TRMT6   | TRMT6 KIAA1153 TRM6 CGI-09    | 0.03 | 0.03 | 0.01 |
| SFLSGLYEFPLNK  | surrogate standard | TRMT6   | TRMT6 KIAA1153 TRM6 CGI-09    | 0.29 | 0.13 | 0.28 |
| SLFPGLETK      | surrogate standard | PUS7    | PUS7 KIAA1897                 | 0.13 | 0.50 | 0.11 |
| FGTTAVPTYQVGR  | isotopic standard  | PUS7    | PUS7 KIAA1897                 | 0.54 | 1.26 | 0.30 |
| QGSPVAAGAPAK   | surrogate standard | IGF2BP1 | IGF2BP1 CRDBP VICKZ1 ZBP1     | 5.25 | 0.71 | 0.42 |

|                   |                    |           |                           |      |      |      |
|-------------------|--------------------|-----------|---------------------------|------|------|------|
| ITISLQDLTYLPER    | isotopic standard  | IGF2BP1   | IGF2BP1 CRDBP VICKZ1 ZBP1 | 3.45 | 0.66 | 1.19 |
| TVNELQNLTAEEVVPR  | surrogate standard | IGF2BP1   | IGF2BP1 CRDBP VICKZ1 ZBP1 | 1.29 | 0.75 | 1.34 |
| LYIGNLSPAVTADDLR  | isotopic standard  | IGF2BP2   | IGF2BP2 IMP2 VICKZ2       | 1.19 | 0.75 | 1.20 |
| TVNELQNLTSAEVIVPR | surrogate standard | IGF2BP2   | IGF2BP2 IMP2 VICKZ2       | 2.68 | 0.48 | 0.90 |
| FTEEIPLK          | surrogate standard | IGF2BP3   | IGF2BP3 IMP3 KOC1 VICKZ3  | 2.68 | 2.57 | 1.74 |
| ITISPLQELTYLPER   | isotopic standard  | IGF2BP3   | IGF2BP3 IMP3 KOC1 VICKZ3  | 2.75 | 0.65 | 1.10 |
| QYEAYVQALEGK      | surrogate standard | WTAP      | WTAP KIAA0105             | 0.85 | 0.63 | 0.76 |
| YTDLNSNDVTGLR     | surrogate standard | WTAP      | WTAP KIAA0105             | 1.13 | 0.66 | 1.11 |
| QVQQPSVAQLR       | isotopic standard  | WTAP      | WTAP KIAA0105             | 0.62 | 1.24 | 0.36 |
| GLSYLQLK          | surrogate standard | VIRMA     | KIAA1429 MSTP054          | 0.52 | 1.76 | 0.69 |
| NLDADLVR          | isotopic standard  | RBM15B    | RBM15B OTT3               | 1.70 | 1.09 | 1.04 |
| LQQLALGR          | isotopic standard  | RBM15     | RBM15 OTT OTT1            | 0.89 | 1.36 | 0.38 |
| VGAGAGAAPFR       | surrogate standard | RBM15     | RBM15 OTT OTT1            | 2.57 | 7.76 | 2.36 |
| LAGSELFAK         | surrogate standard | ZC3H13    | ZC3H13 KIAA0853           | 0.21 | 0.64 | 1.04 |
| VLLATLSIPTPER     | isotopic standard  | EIF3A     | EIF3A EIF3S10 KIAA0139    | 1.41 | 1.15 | 0.87 |
| GTQGVVTFEIFR      | isotopic standard  | EIF3B     | EIF3B EIF3S9              | 1.24 | 1.56 | 1.13 |
| LFIGGLSFETTEESLR  | surrogate standard | HNRNPA2B1 | HNRNPA2B1 HNRPA2B1        | 1.63 | 0.28 | 2.41 |
| IDTIEITDR         | isotopic standard  | HNRNPA2B1 | HNRNPA2B1 HNRPA2B1        | 2.20 | 1.34 | 3.01 |
| TLETVPLER         | surrogate standard | HNRNPA2B1 | HNRNPA2B1 HNRPA2B1        | 1.15 | 1.26 | 1.30 |
| GFAFVQYVNER       | isotopic standard  | HNRNPC    | HNRNPC HNRPC              | 0.42 | 0.67 | 0.46 |
| TIEDDLVSALVR      | isotopic standard  | PUS1      | PUS1 PP8985               | 0.97 | 0.18 | 0.58 |
| LSAETLQQVNR       | surrogate standard | PUS1      | PUS1 PP8985               | 0.58 | 0.96 | 0.46 |
| GYAPESVLER        | surrogate standard | PUS1      | PUS1 PP8985               | 0.73 | 0.71 | 0.78 |
| AAAAVVAAR         | isotopic standard  | TRUB1     | TRUB1 PUS4                | 0.02 | 0.15 | 0.00 |
| IMLPGVLR          | surrogate standard | DKC1      | DKC1 NOLA4                | 0.01 | 0.01 | 0.00 |
| EVVAEVVK          | isotopic standard  | DKC1      | DKC1 NOLA4                | 0.66 | 0.46 | 0.83 |

|                     |                    |         |                                     |      |      |      |
|---------------------|--------------------|---------|-------------------------------------|------|------|------|
| LHNAIEGGTQLSR       | surrogate standard | DKC1    | DKC1 NOLA4                          | 0.63 | 0.66 | 0.23 |
| NLAANDLSPSR         | surrogate standard | NSUN4   | NSUN4                               | 0.74 | 1.17 | 0.68 |
| WGELEGDTYDR         | surrogate standard | NSUN4   | NSUN4                               | 0.39 | 0.09 | 0.62 |
| VLVDVPCTTDR         | isotopic standard  | NSUN4   | NSUN4                               | 1.02 | 0.78 | 1.02 |
| SLGTADVHFER         | surrogate standard | ALYREF  | THOC4                               | 1.32 | 0.88 | 0.74 |
| QYNGVPLDGR          | surrogate standard | ALYREF  | THOC4                               | 1.08 | 1.64 | 1.43 |
| QQLSAEELDAYNAR      | isotopic standard  | ALYREF  | THOC4                               | 2.21 | 0.61 | 2.67 |
| TESDFSNDSEK         | surrogate standard | METTL8  | METTL8                              | 0.25 | 0.00 | 0.53 |
| ILAWAPVEPSFSAR      | surrogate standard | PUS3    | PUS3 FKSG32                         | 0.37 | 0.38 | 0.33 |
| MCPGCSDPVQR         | surrogate standard | CBLL1   | CBLL1 HAKAI RNF188                  | 0.20 | 0.07 | 0.00 |
| DLQAHINHR           | surrogate standard | CBLL1   | CBLL1 HAKAI RNF188                  | 1.19 | 0.30 | 0.12 |
| DSLVLGR             | surrogate standard | CIAO1   | CIAO1 WDR39                         | 1.45 | 2.42 | 1.76 |
| SVLSEGHQR           | surrogate standard | CIAO1   | CIAO1 WDR39                         | 0.01 | 0.29 | 0.00 |
| GTLIQGLR            | surrogate standard | DIS3L2  | DIS3L2 FAM6A                        | 0.62 | 3.16 | 0.49 |
| DYANTLFICR          | surrogate standard | DIS3L2  | DIS3L2 FAM6A                        | 2.47 | 2.38 | 1.49 |
| EGFSDINNR           | surrogate standard | ELP5    | ELP5 C17orf81 DERP6 HSPC002 MSTP071 | 6.00 | 1.74 | 1.03 |
| LACDFLAR            | surrogate standard | FTSJ3   | FTSJ3 SB92                          | 0.18 | 0.21 | 0.06 |
| TSVTDFLR            | surrogate standard | FTSJ3   | FTSJ3 SB92                          | 0.00 | 0.01 | 0.00 |
| AANPVDFLSK          | surrogate standard | FTSJ3   | FTSJ3 SB92                          | 0.08 | 0.23 | 0.10 |
| NVGTGLVGAPACGDVMK   | surrogate standard | ISCU    | ISCU NIFUN                          | 1.07 | 0.65 | 0.91 |
| TFGCGSAIASSSLATEWVK | surrogate standard | ISCU    | ISCU NIFUN                          | 1.25 | 0.72 | 0.54 |
| TVEEALTIK           | surrogate standard | ISCU    | ISCU NIFUN                          | 0.96 | 0.93 | 1.57 |
| IASAIVQAR           | surrogate standard | METTL15 | METTL15 METT5D1                     | 4.54 | 0.64 | 0.70 |
| LDGGFAAVSR          | surrogate standard | METTL17 | METTL17 METT11D1                    | 1.97 | 1.46 | 7.39 |
| YDLPASYK            | surrogate standard | METTL5  | METTL5 DC3 HSPC133                  | 4.91 | 1.54 | 0.00 |

|                    |                    |        |                           |      |      |      |
|--------------------|--------------------|--------|---------------------------|------|------|------|
| QNLPLSSGK          | surrogate standard | MPST   | MPST TST2                 | 0.27 | 0.62 | 0.22 |
| SQPAPAEFR          | surrogate standard | MPST   | MPST TST2                 | 0.65 | 0.96 | 0.46 |
| LLDLVQQSCNYK       | surrogate standard | SNU13  | NHP2L1                    | 0.77 | 1.07 | 1.14 |
| NVPYVFVR           | surrogate standard | SNU13  | NHP2L1                    | 0.66 | 2.05 | 1.57 |
| QQIQSIQQSIER       | surrogate standard | SNU13  | NHP2L1                    | 0.66 | 0.66 | 0.79 |
| VPLDPLIGK          | surrogate standard | NUBP1  | NUBP1 NBP NBP1            | 1.08 | 1.84 | 1.50 |
| GQSFFIDAPDSPATLAYR | surrogate standard | NUBP1  | NUBP1 NBP NBP1            | 1.25 | 0.77 | 1.25 |
| TYVTTPPGTGFLPGDTAR | surrogate standard | OSGEP  | OSGEP GCPL1               | 0.45 | 0.74 | 0.69 |
| LVELPYTVK          | surrogate standard | OSGEP  | OSGEP GCPL1               | 0.83 | 1.93 | 1.61 |
| TPLSDSGVTQR        | surrogate standard | OSGEP  | OSGEP GCPL1               | 1.07 | 1.47 | 0.91 |
| GPDELEGPDSK        | surrogate standard | PRRC2A | PRRC2A BAT2 G2            | 3.50 | 0.03 | 1.07 |
| YLNEQLYSGPSSAAQR   | surrogate standard | RRP8   | RRP8 KIAA0409 NML hucep-1 | 0.48 | 0.03 | 0.08 |
| GVDLYVLEK          | surrogate standard | TP53RK | TP53RK C20orf64 PRPK      | 0.93 | 1.34 | 1.96 |
| VTLPGQEEPWDIR      | surrogate standard | URM1   | URM1 C9orf74              | 1.16 | 0.72 | 2.62 |
| GLLATASEDR         | surrogate standard | WDR6   | WDR6                      | 1.01 | 1.80 | 1.01 |
| LGSTVVDLSVPGK      | surrogate standard | YRDC   | YRDC DRIP3 IRIP           | 0.61 | 0.81 | 0.54 |



**Table S1f. LC-PRM quantification results of RWE proteins in whole-cell lysate of *KAT5*<sup>-/-</sup> cells (n = 3) relative to parental HEK293T cells (n = 3).**

| Protein Symbol | KAT5_KO/HEK293T-1 | s.d. | KAT5_KO/HEK293T-2 | s.d. | KAT5_KO/HEK293T-3 | s.d. | Ave. | S.D. | R.S.D. | p-value (one samples t test) |
|----------------|-------------------|------|-------------------|------|-------------------|------|------|------|--------|------------------------------|
| ADAR           | 1.95              | 1.25 | 0.84              | 0.34 | 1.51              | 1.31 | 1.43 | 0.56 | 39%    | 0.312                        |
| ADAT2          | 2.06              |      | 2.60              |      | 1.45              |      | 2.03 | 0.58 | 28%    | 0.090                        |
| ADAT3          | 0.56              | 0.26 | 0.43              | 0.11 | 0.46              | 0.25 | 0.48 | 0.07 | 14%    | 0.006                        |
| BUD23          | 0.63              | 0.51 | 0.29              | 0.05 | 0.30              | 0.24 | 0.40 | 0.19 | 48%    | 0.033                        |
| CDK5RAP1       | 4.20              | 2.91 | 1.46              | 1.20 | 0.66              | 0.71 | 2.11 | 1.86 | 88%    | 0.411                        |
| CDKAL1         | 2.09              | 0.48 | 0.86              | 0.35 | 0.78              | 0.12 | 1.24 | 0.73 | 59%    | 0.623                        |
| CMTR1          | 0.66              | 0.90 | 0.30              | 0.09 | 0.66              | 0.84 | 0.54 | 0.21 | 38%    | 0.061                        |
| CTU1           | 2.55              | 2.04 | 2.10              | 0.48 | 0.38              | 0.37 | 1.68 | 1.14 | 68%    | 0.412                        |
| CTU2           | 0.70              | 0.45 | 1.14              | 0.04 | 0.64              | 0.53 | 0.82 | 0.27 | 33%    | 0.379                        |
| DCPS           | 0.45              |      | 0.48              |      | 0.13              |      | 0.35 | 0.20 | 56%    | 0.030                        |
| DIMT1          | 1.69              |      | 2.23              |      | 1.90              |      | 1.94 | 0.27 | 14%    | 0.027                        |
| DUS1L          | 0.70              | 0.20 | 0.99              | 0.63 | 0.36              | 0.07 | 0.68 | 0.31 | 46%    | 0.223                        |
| DUS3L          | 1.64              | 0.72 | 0.69              | 0.08 | 0.44              | 0.35 | 0.93 | 0.63 | 68%    | 0.856                        |
| EIF5A2         | 0.10              |      | 0.56              |      | 0.08              |      | 0.25 | 0.27 | 110%   | 0.041                        |
| ELP1           | 0.98              | 0.92 | 0.91              | 0.91 | 1.01              | 0.79 | 0.97 | 0.05 | 5%     | 0.401                        |
| ELP3           | 4.15              | 0.38 | 9.12              | 4.40 | 1.39              | 0.32 | 4.89 | 3.92 | 80%    | 0.228                        |
| ELP4           | 2.72              |      | 2.76              |      | 1.55              |      | 2.34 | 0.69 | 29%    | 0.077                        |
| EMG1           | 0.73              | 0.30 | 0.83              | 0.10 | 0.50              | 0.13 | 0.69 | 0.17 | 25%    | 0.086                        |
| FBL            | 1.19              | 0.67 | 0.46              | 0.22 | 0.57              | 0.58 | 0.74 | 0.39 | 53%    | 0.368                        |
| FTSJ1          | 1.71              | 0.45 | 0.74              | 0.06 | 0.81              | 0.24 | 1.09 | 0.54 | 50%    | 0.808                        |
| GTPBP3         | 0.78              |      | 0.59              |      | 0.80              |      | 0.73 | 0.12 | 16%    | 0.055                        |
| HSD17B10       | 1.07              | 0.56 | 1.15              | 0.80 | 1.05              | 0.54 | 1.09 | 0.05 | 5%     | 0.099                        |
| LCMT2          | 1.53              |      | 0.69              |      | 1.11              |      | 1.11 | 0.42 | 38%    | 0.691                        |
| MEPCE          | 1.43              | 2.13 | 2.24              | 3.76 | 0.52              | 0.88 | 1.39 | 0.86 | 62%    | 0.511                        |
| MOCS3          | 1.01              |      | 0.64              |      | 1.02              |      | 0.89 | 0.22 | 25%    | 0.469                        |

|         |      |      |      |      |      |      |      |      |      |       |
|---------|------|------|------|------|------|------|------|------|------|-------|
| MRM2    | 1.52 |      | 1.48 |      | 0.61 |      | 1.20 | 0.51 | 42%  | 0.563 |
| MRM3    | 1.57 |      | 1.13 |      | 1.07 |      | 1.26 | 0.27 | 21%  | 0.240 |
| MTO1    | 1.17 | 1.17 | 1.26 | 0.74 | 0.77 | 0.51 | 1.07 | 0.26 | 24%  | 0.696 |
| NAT10   | 1.16 | 0.23 | 1.76 | 0.85 | 0.71 | 0.20 | 1.21 | 0.53 | 44%  | 0.561 |
| NFS1    | 1.33 | 0.51 | 0.54 | 0.41 | 0.64 | 0.36 | 0.84 | 0.43 | 51%  | 0.578 |
| NOP2    | 1.25 | 0.37 | 1.32 | 0.45 | 1.96 | 0.45 | 1.51 | 0.39 | 26%  | 0.151 |
| NUDT16  | 0.58 |      | 0.68 |      | 0.72 |      | 0.66 | 0.07 | 11%  | 0.015 |
| PCIF1   | 0.55 |      | 0.98 |      | 0.73 |      | 0.75 | 0.21 | 28%  | 0.185 |
| QTRT1   | 1.75 | 0.00 | 1.07 | 0.35 | 1.33 | 0.13 | 1.38 | 0.34 | 25%  | 0.191 |
| RNGTT   | 0.47 |      | 0.59 |      | 0.65 |      | 0.57 | 0.09 | 16%  | 0.015 |
| RNMT    | 0.69 | 0.22 | 0.76 | 0.43 | 0.79 | 0.12 | 0.75 | 0.05 | 7%   | 0.014 |
| RPUSD2  | 1.15 | 1.40 | 0.87 | 0.69 | 0.41 | 0.45 | 0.81 | 0.37 | 46%  | 0.474 |
| RPUSD3  | 1.46 | 1.52 | 1.32 | 1.51 | 0.49 | 0.64 | 1.09 | 0.52 | 48%  | 0.803 |
| TARBP1  | 0.37 |      | 0.27 |      | 0.12 |      | 0.25 | 0.12 | 49%  | 0.009 |
| TFB1M   | 2.62 |      | 2.74 |      | 1.24 |      | 2.20 | 0.84 | 38%  | 0.131 |
| THG1L   | 0.46 | 0.40 | 0.54 | 0.76 | 0.24 | 0.11 | 0.42 | 0.15 | 37%  | 0.022 |
| THUMPD1 | 0.87 | 0.07 | 1.04 | 0.35 | 1.11 | 0.26 | 1.01 | 0.12 | 12%  | 0.939 |
| TRIT1   | 2.57 |      | 0.16 |      | 0.14 |      | 0.96 | 1.40 | 146% | 0.963 |
| TRMT1   | 0.74 | 0.75 | 0.47 | 0.30 | 0.40 | 0.38 | 0.54 | 0.18 | 33%  | 0.045 |
| TRMT10A | 2.75 |      | 2.08 |      | 0.77 |      | 1.87 | 1.01 | 54%  | 0.276 |
| TRMT10C | 0.69 | 0.40 | 1.01 | 0.94 | 0.59 | 0.39 | 0.76 | 0.22 | 29%  | 0.207 |
| TRMT11  | 1.07 |      | 0.17 |      | 0.58 |      | 0.60 | 0.45 | 74%  | 0.266 |
| TRMT112 | 0.81 | 0.37 | 0.96 | 0.81 | 1.06 | 0.11 | 0.94 | 0.12 | 13%  | 0.514 |
| TRMT13  | 2.63 | 0.29 | 1.95 | 2.22 | 0.48 | 0.46 | 1.69 | 1.10 | 65%  | 0.393 |
| TRMT2A  | 0.42 |      | 0.91 |      | 0.95 |      | 0.76 | 0.30 | 39%  | 0.292 |
| TRMT5   | 2.19 | 1.66 | 0.43 | 0.54 | 0.59 | 0.19 | 1.07 | 0.98 | 91%  | 0.913 |
| TRUB2   | 0.86 | 0.21 | 0.17 | 0.14 | 0.21 | 0.04 | 0.41 | 0.39 | 94%  | 0.121 |
| TYW3    | 1.88 |      | 1.19 |      | 0.93 |      | 1.33 | 0.49 | 37%  | 0.358 |
| WDR4    | 2.52 | 0.16 | 1.52 | 0.11 | 1.23 | 0.19 | 1.76 | 0.68 | 38%  | 0.192 |

|         |      |      |      |      |      |      |      |      |      |       |
|---------|------|------|------|------|------|------|------|------|------|-------|
| YBX1    | 0.77 | 0.50 | 0.37 | 0.45 | 1.29 | 0.60 | 0.81 | 0.46 | 57%  | 0.546 |
| RBMX    | 2.30 | 0.79 | 0.90 | 0.58 | 0.79 | 0.86 | 1.33 | 0.84 | 63%  | 0.567 |
| ELAVL1  | 1.37 | 0.19 | 1.25 | 0.49 | 1.47 | 0.34 | 1.36 | 0.11 | 8%   | 0.029 |
| SND1    | 1.61 | 1.28 | 1.15 | 0.69 | 0.57 | 0.26 | 1.11 | 0.52 | 47%  | 0.750 |
| FMR1    | 0.86 | 0.33 | 0.12 | 0.02 | 0.93 | 0.19 | 0.64 | 0.45 | 71%  | 0.297 |
| LRPPRC  | 0.68 | 0.84 | 1.08 | 1.26 | 0.59 | 0.77 | 0.78 | 0.26 | 34%  | 0.292 |
| PUS7L   | 2.09 | 1.06 | 0.86 | 0.74 | 0.55 | 0.49 | 1.17 | 0.81 | 70%  | 0.757 |
| ALKBH1  | 0.99 |      | 1.38 |      | 0.92 |      | 1.09 | 0.25 | 23%  | 0.576 |
| ALKBH4  | 0.67 | 0.10 | 1.12 | 0.75 | 0.80 | 0.02 | 0.86 | 0.23 | 27%  | 0.406 |
| ALKBH5  | 1.81 | 0.07 | 1.41 | 1.04 | 1.36 | 0.32 | 1.53 | 0.25 | 16%  | 0.067 |
| ALKBH6  | 2.02 |      | 3.48 |      | 1.97 |      | 2.49 | 0.86 | 34%  | 0.095 |
| FTO     | 1.00 | 0.38 | 1.47 | 0.53 | 0.68 | 0.26 | 1.05 | 0.40 | 38%  | 0.845 |
| YTHDF1  | 2.28 | 1.47 | 1.26 | 1.02 | 1.58 | 0.30 | 1.71 | 0.52 | 31%  | 0.143 |
| YTHDF2  | 3.70 | 3.18 | 1.36 | 1.00 | 2.40 | 1.32 | 2.49 | 1.17 | 47%  | 0.159 |
| YTHDF3  | 1.81 | 0.73 | 1.64 | 0.29 | 1.49 | 0.55 | 1.65 | 0.16 | 10%  | 0.020 |
| YTHDC1  | 0.26 |      | 0.66 |      | 0.43 |      | 0.45 | 0.20 | 44%  | 0.042 |
| YTHDC2  | 0.62 | 0.28 | 1.12 | 0.35 | 0.31 | 0.03 | 0.68 | 0.41 | 60%  | 0.314 |
| METTL3  | 2.06 | 0.40 | 2.39 | 0.49 | 1.71 | 0.61 | 2.06 | 0.34 | 17%  | 0.033 |
| METTL14 | 4.32 |      | 9.79 |      | 9.86 |      | 7.99 | 3.18 | 40%  | 0.062 |
| METTL1  | 0.37 | 0.30 | 0.54 | 0.42 | 0.23 | 0.14 | 0.38 | 0.16 | 42%  | 0.021 |
| METTL16 | 2.31 |      | 4.44 |      | 2.02 |      | 2.92 | 1.32 | 45%  | 0.128 |
| METTL2B | 1.05 |      | 0.68 |      | 0.59 |      | 0.77 | 0.24 | 31%  | 0.244 |
| METTL6  | 0.60 |      | 0.21 |      | 0.04 |      | 0.28 | 0.29 | 102% | 0.049 |
| NSUN2   | 1.10 | 1.26 | 0.24 | 0.07 | 0.25 | 0.09 | 0.53 | 0.49 | 93%  | 0.239 |
| NSUN5   | 0.93 | 1.06 | 0.68 | 0.11 | 0.90 | 0.30 | 0.83 | 0.13 | 16%  | 0.167 |
| NSUN6   | 3.75 | 3.04 | 1.57 | 0.22 | 0.79 | 0.43 | 2.04 | 1.53 | 75%  | 0.361 |
| DNMT1   | 0.08 |      | 0.06 |      | 0.09 |      | 0.08 | 0.02 | 21%  | 0.000 |
| TRMT61A | 0.46 | 0.12 | 0.93 | 0.19 | 0.19 | 0.10 | 0.53 | 0.37 | 71%  | 0.158 |
| TRMT61B | 4.21 |      | 0.26 |      | 0.70 |      | 1.73 | 2.17 | 126% | 0.621 |

|           |      |      |      |      |      |      |      |      |      |       |
|-----------|------|------|------|------|------|------|------|------|------|-------|
| TRMT6     | 0.16 | 0.19 | 0.08 | 0.07 | 0.14 | 0.19 | 0.13 | 0.04 | 33%  | 0.001 |
| PUS7      | 0.33 | 0.29 | 0.88 | 0.54 | 0.20 | 0.13 | 0.47 | 0.36 | 76%  | 0.125 |
| IGF2BP1   | 3.33 | 1.98 | 0.71 | 0.04 | 0.98 | 0.50 | 1.67 | 1.44 | 86%  | 0.504 |
| IGF2BP2   | 1.93 | 1.05 | 0.62 | 0.19 | 1.05 | 0.21 | 1.20 | 0.67 | 56%  | 0.660 |
| IGF2BP3   | 2.71 | 0.05 | 1.61 | 1.35 | 1.42 | 0.45 | 1.91 | 0.70 | 37%  | 0.152 |
| WTAP      | 0.87 | 0.25 | 0.84 | 0.34 | 0.75 | 0.37 | 0.82 | 0.06 | 8%   | 0.037 |
| VIRMA     | 0.52 |      | 1.76 |      | 0.69 |      | 0.99 | 0.67 | 68%  | 0.983 |
| RBM15B    | 1.70 |      | 1.09 |      | 1.04 |      | 1.28 | 0.37 | 29%  | 0.321 |
| RBM15     | 1.73 | 1.19 | 4.56 | 4.53 | 1.37 | 1.40 | 2.55 | 1.75 | 68%  | 0.264 |
| ZC3H13    | 0.21 |      | 0.64 |      | 1.04 |      | 0.63 | 0.41 | 66%  | 0.263 |
| EIF3A     | 1.41 |      | 1.15 |      | 0.87 |      | 1.14 | 0.27 | 23%  | 0.448 |
| EIF3B     | 1.24 |      | 1.56 |      | 1.13 |      | 1.31 | 0.22 | 17%  | 0.139 |
| HNRNPA2B1 | 1.66 | 0.53 | 0.96 | 0.59 | 2.24 | 0.87 | 1.62 | 0.64 | 40%  | 0.236 |
| HNRNPC    | 0.42 |      | 0.67 |      | 0.46 |      | 0.51 | 0.14 | 27%  | 0.026 |
| PUS1      | 0.76 | 0.20 | 0.62 | 0.40 | 0.61 | 0.17 | 0.66 | 0.08 | 13%  | 0.020 |
| TRUB1     | 0.02 |      | 0.15 |      | 0.00 |      | 0.06 | 0.08 | 135% | 0.002 |
| DKC1      | 0.43 | 0.37 | 0.38 | 0.33 | 0.35 | 0.43 | 0.39 | 0.04 | 10%  | 0.001 |
| NSUN4     | 0.71 | 0.32 | 0.68 | 0.55 | 0.77 | 0.22 | 0.72 | 0.05 | 6%   | 0.009 |
| ALYREF    | 1.54 | 0.59 | 1.04 | 0.53 | 1.61 | 0.98 | 1.40 | 0.31 | 22%  | 0.156 |
| METTL8    | 0.25 |      | 0.00 |      | 0.53 |      | 0.26 | 0.27 | 102% | 0.041 |
| PUS3      | 0.37 |      | 0.38 |      | 0.33 |      | 0.36 | 0.03 | 8%   | 0.001 |
| CBLL1     | 0.70 | 0.70 | 0.19 | 0.17 | 0.06 | 0.09 | 0.31 | 0.34 | 107% | 0.072 |
| CIAO1     | 0.73 | 1.02 | 1.35 | 1.51 | 0.88 | 1.24 | 0.99 | 0.32 | 33%  | 0.955 |
| DIS3L2    | 1.54 | 1.31 | 2.77 | 0.55 | 0.99 | 0.71 | 1.77 | 0.91 | 51%  | 0.281 |
| ELP5      | 6.00 |      | 1.74 |      | 1.03 |      | 2.92 | 2.69 | 92%  | 0.341 |
| FTSJ3     | 0.09 | 0.09 | 0.15 | 0.12 | 0.05 | 0.05 | 0.10 | 0.05 | 51%  | 0.001 |
| ISCU      | 1.09 | 0.15 | 0.77 | 0.15 | 1.01 | 0.52 | 0.96 | 0.17 | 18%  | 0.696 |
| METTL15   | 4.54 |      | 0.64 |      | 0.70 |      | 1.96 | 2.24 | 114% | 0.536 |
| METTL17   | 1.97 |      | 1.46 |      | 7.39 |      | 3.60 | 3.29 | 91%  | 0.304 |

|        |      |      |      |      |      |      |      |      |      |       |
|--------|------|------|------|------|------|------|------|------|------|-------|
| METTL5 | 4.91 |      | 1.54 |      | 0.00 |      | 2.15 | 2.51 | 117% | 0.511 |
| MPST   | 0.46 | 0.27 | 0.79 | 0.24 | 0.34 | 0.17 | 0.53 | 0.23 | 44%  | 0.073 |
| SNU13  | 0.70 | 0.07 | 1.26 | 0.71 | 1.16 | 0.39 | 1.04 | 0.30 | 29%  | 0.834 |
| NUBP1  | 1.17 | 0.12 | 1.31 | 0.76 | 1.37 | 0.18 | 1.28 | 0.11 | 8%   | 0.044 |
| OSGEP  | 0.78 | 0.31 | 1.38 | 0.60 | 1.07 | 0.48 | 1.08 | 0.30 | 28%  | 0.695 |
| PRRC2A | 3.50 |      | 0.03 |      | 1.07 |      | 1.53 | 1.78 | 116% | 0.656 |
| RRP8   | 0.48 |      | 0.03 |      | 0.08 |      | 0.20 | 0.25 | 125% | 0.030 |
| TP53RK | 0.93 |      | 1.34 |      | 1.96 |      | 1.41 | 0.52 | 37%  | 0.305 |
| URM1   | 1.16 |      | 0.72 |      | 2.62 |      | 1.50 | 0.99 | 66%  | 0.473 |
| WDR6   | 1.01 |      | 1.80 |      | 1.01 |      | 1.27 | 0.46 | 36%  | 0.412 |
| YRDC   | 0.61 |      | 0.81 |      | 0.54 |      | 0.65 | 0.14 | 21%  | 0.048 |

**Table S1g. LC-PRM quantification results of tryptic peptides from RWE proteins in chromatin fraction of *SETD2*<sup>-/-</sup> cells (n = 3) relative to parental HEK293T cells (n = 3).**

| Peptide                    | standard type      | Protein Symbol | Protein Gene                        | SETD2_KO/HEK293T-chromatin-ratio-1 | SETD2_KO/HEK293T-chromatin-ratio-2 | SETD2_KO/HEK293T-chromatin-ratio-3 |
|----------------------------|--------------------|----------------|-------------------------------------|------------------------------------|------------------------------------|------------------------------------|
| YLNTNPVGGLLLEYAR           | surrogate standard | ADAR           | ADAR ADAR1 DSRAD G1P1 IFI4          | 0.19                               | 0.38                               | 0.47                               |
| VLIGENEK                   | surrogate standard | ADAR           | ADAR ADAR1 DSRAD G1P1 IFI4          | 0.92                               | 0.82                               | 1.34                               |
| DGSAFEDGLR                 | surrogate standard | ADAR           | ADAR ADAR1 DSRAD G1P1 IFI4          | 0.72                               | 0.86                               | 1.17                               |
| GFGVQELK                   | surrogate standard | ADAT1          | ADAT1                               | 1.91                               | 5.14                               | 5.58                               |
| AVGAVVVDPASDR              | surrogate standard | ADAT3          | ADAT3 TAD3                          | 1.00                               | 0.24                               | 0.27                               |
| AVLQLYPENSEQLELI<br>TTQATK | surrogate standard | BUD23          | WBSCR22 MERM1 HUSSY-03<br>PP3381    | 0.17                               | 0.90                               | 1.11                               |
| AGFSGGMVVDYPNS<br>AK       | surrogate standard | BUD23          | WBSCR22 MERM1 HUSSY-03<br>PP3381    | 0.57                               | 0.82                               | 0.70                               |
| ESVFTNER                   | surrogate standard | BUD23          | WBSCR22 MERM1 HUSSY-03<br>PP3381    | 0.64                               | 0.68                               | 0.99                               |
| VIFPDAEMEDVNNPG<br>LR      | surrogate standard | CDK5RAP<br>1   | CDK5RAP1 C20orf34 CGI-05<br>HSPC167 | 0.09                               | 1.31                               | 0.35                               |
| ITSASSQTLR                 | surrogate standard | CDK5RAP<br>1   | CDK5RAP1 C20orf34 CGI-05<br>HSPC167 | 0.74                               | 0.58                               | 0.68                               |
| GNLASYPIDELVDR             | surrogate standard | CDKAL1         | CDKAL1                              | 0.25                               | 0.15                               | 0.42                               |
| DIGTNLPTLLWK               | surrogate standard | CDKAL1         | CDKAL1                              | 0.04                               | 0.06                               | 0.03                               |
| GFGMTLK                    | surrogate standard | CMTR1          | CMTR1 FTSJD2 KIAA0082<br>MTR1       | 1.16                               | 0.80                               | 0.36                               |
| NTSDSVNLVVPLEVIK           | surrogate standard | CMTR1          | CMTR1 FTSJD2 KIAA0082<br>MTR1       | 0.25                               | 0.23                               | 0.53                               |
| SQIYTDWGR                  | surrogate standard | CMTR1          | CMTR1 FTSJD2 KIAA0082<br>MTR1       | 1.25                               | 0.59                               | 0.84                               |
| DMATFLAEDPK                | surrogate standard | APOBEC3<br>G   | APOBEC3G MDS019                     | 1.06                               | 1.05                               | 1.44                               |
| TLNEAIEK                   | surrogate standard | CMTR2          | CMTR2 AFT FTSJD1                    | 0.10                               | 0.15                               | 0.24                               |
| GGGLGSPGEGGALP<br>R        | surrogate standard | CTU1           | CTU1 ATPBD3 NCS6                    | 0.48                               | 0.21                               | 0.24                               |
| EELLQTLR                   | surrogate standard | CTU2           | CTU2                                | 0.00                               | 0.12                               | 0.11                               |
| LQTQFPSTVSTVYR             | surrogate standard | CTU2           | CTU2                                | 0.32                               | 0.10                               | 0.07                               |
| LYIIPGIPK                  | surrogate standard | DCP2           | DCP2 NUDT20                         | 0.64                               | 0.35                               | 0.15                               |

|                      |                    |          |                                        |      |      |      |
|----------------------|--------------------|----------|----------------------------------------|------|------|------|
| NPLIINSIDK           | surrogate standard | DIMT1    | DIMT1 DIMT1L HUSSY-05                  | 0.87 | 0.74 | 0.48 |
| LQVLVGDVLK           | surrogate standard | DIMT1    | DIMT1 DIMT1L HUSSY-05                  | 0.86 | 0.68 | 0.28 |
| LQGFEFWSR            | surrogate standard | DUS1L    | DUS1L                                  | 0.22 | 0.13 | 0.05 |
| LSVPVTCK             | surrogate standard | DUS1L    | DUS1L                                  | 0.36 | 0.30 | 0.25 |
| YLETKPADLGPR         | surrogate standard | DUS3L    | DUS3L                                  | 0.33 | 0.52 | 0.91 |
| TCGPLTDEDVVR         | surrogate standard | DUS3L    | DUS3L                                  | 0.32 | 0.86 | 0.75 |
| NGFVVLK              | surrogate standard | EIF5A2   | EIF5A2                                 | 0.82 | 0.34 | 0.28 |
| YEDICPSTHNMDVPNIK    | surrogate standard | EIF5A2   | EIF5A2                                 | 0.36 | 0.25 | 0.24 |
| VLVTVFR              | surrogate standard | ELP1     | IKBKAP ELP1 IKAP                       | 0.51 | 0.41 | 0.25 |
| LYPTLVIR             | surrogate standard | ELP3     | ELP3                                   | 0.32 | 0.08 | 0.04 |
| TYELLNCDK            | surrogate standard | EMG1     | EMG1 C2F                               | 0.72 | 0.95 | 1.32 |
| VGTSFSIPVVS DVR      | surrogate standard | EMG1     | EMG1 C2F                               | 1.48 | 0.83 | 0.86 |
| VSVEYTEK             | surrogate standard | EMG1     | EMG1 C2F                               | 0.44 | 0.55 | 0.75 |
| NVMVEPHR             | surrogate standard | FBL      | FBL FIB1 FLRN                          | 0.58 | 0.53 | 1.35 |
| NLVPGESVYGEK         | surrogate standard | FBL      | FBL FIB1 FLRN                          | 1.15 | 1.88 | 2.09 |
| EFQLFQGVTR           | surrogate standard | FTSJ1    | FTSJ1 JM23                             | 0.15 | 0.02 | 0.03 |
| AVDLCAAPGSWSQVLSQK   | surrogate standard | FTSJ1    | FTSJ1 JM23                             | 0.38 | 0.15 | 0.10 |
| SYPLDLEGGSEYK        | surrogate standard | FTSJ1    | FTSJ1 JM23                             | 0.50 | 0.19 | 0.19 |
| GLVAVITGGASGLGLATAER | surrogate standard | HSD17B10 | HSD17B10 ERAB HADH2 MRPP2 SCHAD XH98G2 | 0.19 | 0.23 | 0.21 |
| DVQTALALAK           | surrogate standard | HSD17B10 | HSD17B10 ERAB HADH2 MRPP2 SCHAD XH98G2 | 0.53 | 0.10 | 0.40 |
| VCNFLASQVPFPSR       | surrogate standard | HSD17B10 | HSD17B10 ERAB HADH2 MRPP2 SCHAD XH98G2 | 0.40 | 0.19 | 0.09 |
| AFLEQIGAPQAALR       | surrogate standard | LCMT2    | LCMT2 KIAA0547 TYW4                    | 1.39 | 0.63 | 0.42 |
| NSCNVGGGGGGFK        | surrogate standard | MEPCE    | MEPCE BCDIN3                           | 0.76 | 0.70 | 0.57 |
| FQYGYNYCK            | surrogate standard | MEPCE    | MEPCE BCDIN3                           | 1.01 | 0.78 | 0.48 |

|                      |                    |        |                    |      |      |      |
|----------------------|--------------------|--------|--------------------|------|------|------|
| SCFPASLTASR          | surrogate standard | MEPCE  | MEPCE BCDIN3       | 1.31 | 1.44 | 0.75 |
| LLDDLVPTSR           | surrogate standard | MRM1   | MRM1               | 1.52 | 0.96 | 2.08 |
| NSCPLTPVVSK          | surrogate standard | MRM1   | MRM1               | 0.73 | 1.59 | 1.82 |
| ILEVLPGR             | surrogate standard | MRM2   | FTSJ2 FJH1 MRM2    | 1.58 | 0.25 | 0.69 |
| APSTWEESGLR          | surrogate standard | MRM3   | RNMTL1 MRM3 HC90   | 0.82 | 0.73 | 0.83 |
| DPGNLGTILR           | surrogate standard | MRM3   | RNMTL1 MRM3 HC90   | 0.45 | 0.40 | 0.48 |
| LGFBVGR              | surrogate standard | MTO1   | MTO1 CGI-02        | 0.53 | 0.28 | 0.22 |
| LIPEASISTSR          | surrogate standard | MTO1   | MTO1 CGI-02        | 1.14 | 0.17 | 0.61 |
| SLFVVVGDGR           | surrogate standard | NAT10  | NAT10 ALP KIAA1709 | 0.51 | 0.28 | 0.22 |
| LDYLGVSYGLTPR        | surrogate standard | NAT10  | NAT10 ALP KIAA1709 | 0.84 | 0.31 | 0.15 |
| AGPNASIISLK          | surrogate standard | NAT10  | NAT10 ALP KIAA1709 | 0.81 | 0.83 | 0.51 |
| SLEAEGFQVTYLPVQ<br>K | surrogate standard | NFS1   | NFS1 NIFS HUSSY-08 | 1.17 | 0.41 | 0.57 |
| AIGTDEDLAHSSIR       | surrogate standard | NFS1   | NFS1 NIFS HUSSY-08 | 0.81 | 0.66 | 0.77 |
| IQDIVGILR            | surrogate standard | NOP2   | NOP2 NOL1 NSUN1    | 1.77 | 1.90 | 1.47 |
| DLAQALINR            | surrogate standard | NOP2   | NOP2 NOL1 NSUN1    | 1.59 | 1.85 | 1.67 |
| LGVTNTIISHYDGR       | surrogate standard | NOP2   | NOP2 NOL1 NSUN1    | 0.99 | 3.67 | 2.25 |
| GADSELSTVPSVTK       | surrogate standard | NOP2   | NOP2 NOL1 NSUN1    | 1.28 | 2.05 | 3.10 |
| GTDTQTPAVLSPSK       | surrogate standard | NOP2   | NOP2 NOL1 NSUN1    | 1.64 | 2.13 | 5.35 |
| LGFPGGFVDTQDR        | surrogate standard | NUDT16 | NUDT16             | 0.38 | 0.20 | 0.18 |
| EELGEAAAAFR          | surrogate standard | NUDT16 | NUDT16             | 0.37 | 0.14 | 0.34 |
| EIMNDIPR             | surrogate standard | PCIF1  | PCIF1              | 0.22 | 0.19 | 0.22 |
| LVYCYPVR             | surrogate standard | PCIF1  | PCIF1              | 0.70 | 0.38 | 0.17 |
| LQELSAAYR            | surrogate standard | PCIF1  | PCIF1              | 0.94 | 0.42 | 0.45 |
| GITTEQLDALGCR        | surrogate standard | QTRT1  | QTRT1 TGT TGUT     | 0.82 | 0.48 | 0.64 |



|                 |                    |         |                                |      |      |      |
|-----------------|--------------------|---------|--------------------------------|------|------|------|
| YDSQVAEENR      | surrogate standard | RNGTT   | RNGTT CAP1A                    | 0.45 | 0.35 | 0.32 |
| FNSQPVGDCDFNVR  | surrogate standard | RNGTT   | RNGTT CAP1A                    | 0.62 | 0.65 | 0.64 |
| SVLIGEFLEK      | surrogate standard | RNMT    | RNMT KIAA0398                  | 1.05 | 0.51 | 0.69 |
| TFLEFYEEK       | surrogate standard | RNMT    | RNMT KIAA0398                  | 1.40 | 0.45 | 0.99 |
| LPLGTLSK        | surrogate standard | RNMT    | RNMT KIAA0398                  | 0.86 | 0.54 | 0.66 |
| VGTVLGQR        | surrogate standard | RPUSD3  | RPUSD3                         | 0.48 | 0.51 | 0.61 |
| DTPVELLAPLPYFSR | surrogate standard | RPUSD3  | RPUSD3                         | 0.13 | 0.24 | 0.27 |
| TLQCLGLR        | surrogate standard | RPUSD3  | RPUSD3                         | 0.46 | 0.79 | 0.60 |
| MTLSPSYR        | surrogate standard | RPUSD4  | RPUSD4                         | 0.81 | 0.92 | 0.73 |
| GSGGAGALPEAAR   | surrogate standard | TARBP1  | TARBP1 TRM3 TRP185             | 0.61 | 0.62 | 0.64 |
| LLPVLVQCQGAALR  | surrogate standard | TARBP1  | TARBP1 TRM3 TRP185             | 0.37 | 0.43 | 0.20 |
| IFLDPLLDVLMK    | surrogate standard | TARBP1  | TARBP1 TRM3 TRP185             | 0.08 | 0.27 | 0.07 |
| LPPLPTIR        | surrogate standard | TFB1M   | TFB1M CGI-75                   | 0.43 | 0.47 | 0.24 |
| DGPFVYGR        | surrogate standard | TFB1M   | TFB1M CGI-75                   | 0.18 | 0.57 | 0.29 |
| VIAIDIPVK       | surrogate standard | TGS1    | TGS1 HCA137 NCOA6IP PIMT       | 0.31 | 0.62 | 1.12 |
| VVYPSNQTLK      | surrogate standard | THG1L   | THG1L ICF45                    | 0.31 | 0.15 | 0.03 |
| ELAGIVCTLNSENK  | surrogate standard | THUMPD1 | THUMPD1                        | 1.71 | 0.16 | 0.82 |
| STLALQLGQR      | surrogate standard | TRIT1   | TRIT1 IPT MOD5                 | 0.13 | 0.41 | 0.28 |
| DLTCAVITEFAR    | surrogate standard | TRMT1   | TRMT1                          | 0.06 | 0.11 | 0.05 |
| FALEVPLR        | surrogate standard | TRMT1   | TRMT1                          | 1.09 | 0.35 | 0.19 |
| IPAVTYPK        | surrogate standard | TRMT10C | TRMT10C MRPP1 RG9MTD1          | 0.29 | 0.31 | 0.23 |
| LLLTSTEK        | surrogate standard | TRMT10C | TRMT10C MRPP1 RG9MTD1          | 0.30 | 0.43 | 0.31 |
| IDALEFLPFEGK    | surrogate standard | TRMT11  | TRMT11 C6orf75 MDS024          | 0.20 | 0.13 | 0.46 |
| GPVEGYEENEFLR   | surrogate standard | TRMT112 | TRMT112 AD-001 HSPC152 HSPC170 | 0.47 | 0.65 | 0.69 |

|                          |                    |        |                     |      |      |      |
|--------------------------|--------------------|--------|---------------------|------|------|------|
| DDLFTSEIFK               | surrogate standard | TRMT2A | TRMT2A HTF9C        | 0.12 | 0.02 | 0.03 |
| AFQEFIR                  | surrogate standard | TRMT2A | TRMT2A HTF9C        | 0.53 | 0.37 | 0.34 |
| AVLPEGQDVTSGFSR          | surrogate standard | TRMT5  | TRMT5 KIAA1393 TRM5 | 0.91 | 0.27 | 0.23 |
| ILAVIQGSHQK              | surrogate standard | TRUB2  | TRUB2               | 0.34 | 1.01 | 0.99 |
| DGFFTLDSALLR             | surrogate standard | TRUB2  | TRUB2               | 0.82 | 0.34 | 0.17 |
| AATPQVAEELEK             | surrogate standard | TRUB2  | TRUB2               | 1.08 | 1.39 | 2.43 |
| DQFFTTSSCAGR             | surrogate standard | TYW3   | TYW3 C1orf171       | 1.07 | 0.38 | 0.56 |
| ISVVPTQPGLLLSSSG<br>DGLR | surrogate standard | WDR4   | WDR4                | 1.57 | 0.56 | 0.40 |
| GAEANVTGPGGVP<br>VQGSK   | surrogate standard | YBX1   | YBX1 NSEP1 YB1      | 0.91 | 0.94 | 0.59 |
| NEGSESAPEGQAQQ<br>R      | surrogate standard | YBX1   | YBX1 NSEP1 YB1      | 0.55 | 0.22 | 0.28 |
| AADPPAENSSAPEAE<br>QGGAE | surrogate standard | YBX1   | YBX1 NSEP1 YB1      | 0.98 | 1.64 | 0.64 |
| ALEAVFGK                 | surrogate standard | RBMX   | RBMX HNRPG RBMXP1   | 0.71 | 1.47 | 1.65 |
| SAPSGPVR                 | surrogate standard | RBMX   | RBMX HNRPG RBMXP1   | 1.02 | 1.12 | 1.34 |
| SDLYSSGR                 | surrogate standard | RBMX   | RBMX HNRPG RBMXP1   | 1.14 | 1.20 | 1.40 |
| SLFSSIGEVESAK            | surrogate standard | ELAVL1 | HuR                 | 0.84 | 1.07 | 0.81 |
| DVEDMFSR                 | surrogate standard | ELAVL1 | HuR                 | 0.80 | 1.07 | 0.92 |
| VLVDQTTGLSR              | surrogate standard | ELAVL1 | HuR                 | 0.83 | 1.12 | 1.07 |
| YTIENPR                  | surrogate standard | SND1   | SND1 TDRD11         | 0.59 | 0.45 | 0.56 |
| EVLPSTR                  | surrogate standard | SND1   | SND1 TDRD11         | 0.43 | 0.45 | 0.57 |
| LGTLSPAFSTR              | surrogate standard | SND1   | SND1 TDRD11         | 0.57 | 0.77 | 0.55 |
| DINESDEVEVYSR            | surrogate standard | FMR1   | FMR1                | 0.79 | 0.49 | 0.32 |
| SFLEFAEDVIQVPR           | surrogate standard | FMR1   | FMR1                | 0.41 | 0.34 | 0.16 |
| IPENIYR                  | surrogate standard | LRPPRC | LRPPRC LRP130       | 0.61 | 0.61 | 0.43 |
| LQWFCDR                  | surrogate standard | LRPPRC | LRPPRC LRP130       | 0.49 | 0.99 | 0.35 |

|                   |                    |        |                       |      |      |      |
|-------------------|--------------------|--------|-----------------------|------|------|------|
| LDLQNLSELDGR      | surrogate standard | PUS7L  | PUS7L                 | 1.23 | 0.39 | 1.11 |
| AEGLDCSYTVLFGK    | surrogate standard | ALKBH2 | ALKBH2 ABH2           | 0.28 | 0.11 | 0.15 |
| EVEYFTGALAR       | isotopic standard  | ALKBH2 | ALKBH2 ABH2           | 0.18 | 0.00 | 0.03 |
| SQAIAQPATTAK      | surrogate standard | ALKBH3 | ALKBH3 ABH3 DEPC1     | 0.62 | 0.28 | 0.28 |
| VCLYPGFVDVK       | surrogate standard | ALKBH3 | ALKBH3 ABH3 DEPC1     | 0.49 | 0.38 | 0.18 |
| EDITYQQPR         | isotopic standard  | ALKBH3 | ALKBH3 ABH3 DEPC1     | 2.06 | 0.52 | 0.33 |
| TEGFCGLPSFSR      | surrogate standard | ALKBH4 | ALKBH4 ABH4           | 0.24 | 0.14 | 0.12 |
| SLLVLTGAAR        | surrogate standard | ALKBH4 | ALKBH4 ABH4           | 0.87 | 0.71 | 0.67 |
| ELSAEFGPGGR       | isotopic standard  | ALKBH4 | ALKBH4 ABH4           | 0.82 | 0.66 | 0.69 |
| LFSQDECAK         | surrogate standard | ALKBH5 | ALKBH5 ABH5 OFOXD1    | 1.24 | 0.72 | 0.92 |
| GLYNEHTVDR        | surrogate standard | ALKBH5 | ALKBH5 ABH5 OFOXD1    | 1.24 | 0.53 | 0.56 |
| VSEPVLSLPVR       | isotopic standard  | ALKBH5 | ALKBH5 ABH5 OFOXD1    | 1.07 | 1.74 | 1.85 |
| ILIGNPGCTYK       | surrogate standard | FTO    | FTO KIAA1752          | 0.62 | 3.28 | 0.76 |
| SGPVMGGGLPPPIK    | surrogate standard | YTHDF1 | YTHDF1                | 1.00 | 0.73 | 0.29 |
| SPVDYGTSAVWSQDK   | isotopic standard  | YTHDF1 | YTHDF1                | 0.44 | 0.06 | 0.04 |
| DGLNDDDFEPYLSPQAR | isotopic standard  | YTHDF2 | YTHDF2 HGRG8          | 0.38 | 0.46 | 0.37 |
| LGSTEVASNVPK      | surrogate standard | YTHDF2 | YTHDF2 HGRG8          | 1.03 | 0.89 | 0.82 |
| DVPNSQLR          | surrogate standard | YTHDF2 | YTHDF2 HGRG8          | 0.49 | 0.40 | 0.54 |
| AITDGQAGFGNDTLK   | isotopic standard  | YTHDF3 | YTHDF3                | 1.25 | 1.02 | 1.08 |
| VPGISSIEQGMTGLK   | isotopic standard  | YTHDF3 | YTHDF3                | 0.90 | 0.43 | 0.46 |
| GNVGIGGSAPPPPIK   | isotopic standard  | YTHDF3 | YTHDF3                | 0.92 | 0.77 | 0.73 |
| SNNHENVSLAK       | surrogate standard | YTHDC1 | YTHDC1 KIAA1966 YT521 | 1.04 | 0.71 | 1.38 |
| GVWSTLPVNEK       | isotopic standard  | YTHDC1 | YTHDC1 KIAA1966 YT521 | 1.28 | 0.63 | 0.83 |
| LSQSLGLVSK        | surrogate standard | YTHDC2 | YTHDC2                | 1.33 | 1.10 | 1.12 |

|                |                    |         |                               |      |      |      |
|----------------|--------------------|---------|-------------------------------|------|------|------|
| VVLIVGETGSGK   | isotopic standard  | YTHDC2  | YTHDC2                        | 0.89 | 3.57 | 0.43 |
| LAAIAVAER      | surrogate standard | YTHDC2  | YTHDC2                        | 3.70 | 5.10 | 5.34 |
| NPEAALSPTFR    | isotopic standard  | METTL3  | METTL3 MTA70                  | 1.04 | 0.58 | 0.58 |
| YLDVSILGK      | surrogate standard | METTL3  | METTL3 MTA70                  | 0.86 | 0.21 | 0.17 |
| LEIDEIAAPR     | isotopic standard  | METTL14 | METTL14 KIAA1627              | 0.72 | 0.19 | 0.47 |
| VSDYVQDR       | surrogate standard | METTL1  | METTL1 C12orf1                | 0.25 | 0.10 | 0.03 |
| VTYTEFCQGR     | surrogate standard | METTL16 | METTL16 METT10D               | 0.85 | 0.44 | 0.32 |
| LPGVAGQYLFK    | surrogate standard | METTL16 | METTL16 METT10D               | 0.60 | 0.43 | 0.17 |
| TQTPPVEENVTK   | isotopic standard  | METTL2B | METTL2B                       | 0.79 | 0.43 | 0.54 |
| GAEQLAEGGR     | surrogate standard | NSUN2   | NSUN2 SAKI TRM4               | 0.95 | 0.90 | 1.09 |
| FYALDPSFPR     | isotopic standard  | NSUN2   | NSUN2 SAKI TRM4               | 1.42 | 0.84 | 0.75 |
| QLEEPGAGTSPVVR | surrogate standard | NSUN5   | NSUN5 NSUN5A WBSCR20 WBSCR20A | 0.80 | 0.90 | 1.16 |
| DALQQNPGAFR    | surrogate standard | NSUN5   | NSUN5 NSUN5A WBSCR20 WBSCR20A | 0.97 | 0.74 | 0.93 |
| NLLLDELQK      | surrogate standard | NSUN6   | NSUN6 NOPD1                   | 1.22 | 0.40 | 0.64 |
| QNALLLGLNSIR   | surrogate standard | NSUN6   | NSUN6 NOPD1                   | 0.01 | 0.03 | 0.04 |
| EVASYQPLQR     | isotopic standard  | NSUN6   | NSUN6 NOPD1                   | 0.47 | 0.26 | 0.29 |
| GAGLSCEQLK     | surrogate standard | NSUN6   | NSUN6 NOPD1                   | 0.92 | 0.32 | 0.45 |
| FFLENVNR       | isotopic standard  | DNMT1   | DNMT1 AIM CXXC9 DNMT          | 0.44 | 0.50 | 0.44 |
| SQGFPD TYR     | surrogate standard | DNMT1   | DNMT1 AIM CXXC9 DNMT          | 0.98 | 0.69 | 0.98 |
| FCSFSPCIEVQQR  | surrogate standard | TRMT61A | TRMT61A                       | 0.26 | 0.49 | 0.45 |
| TCQALAAR       | isotopic standard  | TRMT61A | TRMT61A                       | 0.23 | 0.79 | 0.48 |
| HSVDLIGR       | surrogate standard | TRMT61A | TRMT61A                       | 0.06 | 0.37 | 0.14 |
| DISGATEDIK     | isotopic standard  | TRMT61B | TRMT61B                       | 0.47 | 1.44 | 0.48 |
| AATACFGFPK     | isotopic standard  | TRMT6   | TRMT6 KIAA1153 TRM6 CGI-09    | 0.38 | 0.30 | 0.36 |

|                    |                    |         |                            |      |      |      |
|--------------------|--------------------|---------|----------------------------|------|------|------|
| SFLSGLYEFPLNK      | surrogate standard | TRMT6   | TRMT6 KIAA1153 TRM6 CGI-09 | 0.13 | 0.37 | 0.11 |
| NYQVLPDR           | surrogate standard | TRMT6   | TRMT6 KIAA1153 TRM6 CGI-09 | 0.52 | 0.71 | 0.76 |
| SLFPGLETK          | surrogate standard | PUS7    | PUS7 KIAA1897              | 1.25 | 0.47 | 0.34 |
| FGTTAVPTYQVGR      | isotopic standard  | PUS7    | PUS7 KIAA1897              | 0.87 | 0.38 | 0.25 |
| QGSPVAAGAPAK       | surrogate standard | IGF2BP1 | IGF2BP1 CRDBP VICKZ1 ZBP1  | 0.79 | 0.74 | 0.79 |
| ITISLQDLTLYNPER    | isotopic standard  | IGF2BP1 | IGF2BP1 CRDBP VICKZ1 ZBP1  | 0.11 | 0.15 | 0.33 |
| TVNELQNLTAAEVVVPR  | surrogate standard | IGF2BP1 | IGF2BP1 CRDBP VICKZ1 ZBP1  | 1.30 | 0.81 | 1.01 |
| LYIGNLSPAVTADDLR   | isotopic standard  | IGF2BP2 | IGF2BP2 IMP2 VICKZ2        | 0.48 | 0.51 | 0.62 |
| TVNELQNL TSAEVIVPR | surrogate standard | IGF2BP2 | IGF2BP2 IMP2 VICKZ2        | 2.21 | 0.77 | 1.53 |
| FTEEIPLK           | surrogate standard | IGF2BP3 | IGF2BP3 IMP3 KOC1 VICKZ3   | 1.03 | 1.22 | 1.11 |
| ITISPLQELTLYNPER   | isotopic standard  | IGF2BP3 | IGF2BP3 IMP3 KOC1 VICKZ3   | 0.15 | 0.29 | 0.45 |
| IAPAEAPDAK         | surrogate standard | IGF2BP3 | IGF2BP3 IMP3 KOC1 VICKZ3   | 1.67 | 1.29 | 1.45 |
| QYEAYVQALEGK       | surrogate standard | WTAP    | WTAP KIAA0105              | 1.78 | 0.66 | 0.67 |
| YTDLNSNDVTGLR      | surrogate standard | WTAP    | WTAP KIAA0105              | 0.95 | 0.97 | 1.01 |
| QVQQPSVAQLR        | isotopic standard  | WTAP    | WTAP KIAA0105              | 1.72 | 0.76 | 0.81 |
| FPCVVYINEVR        | isotopic standard  | VIRMA   | KIAA1429 MSTP054           | 1.00 | 0.50 | 0.43 |
| GLSYLQLK           | surrogate standard | VIRMA   | KIAA1429 MSTP054           | 1.24 | 0.59 | 0.37 |
| NLDADLVR           | isotopic standard  | RBM15B  | RBM15B OTT3                | 1.24 | 1.06 | 2.78 |
| QAAGVISLPVGGSK     | surrogate standard | RBM15B  | RBM15B OTT3                | 1.33 | 0.90 | 1.43 |
| SLSPGGAALGYR       | surrogate standard | RBM15   | RBM15 OTT OTT1             | 1.34 | 0.52 | 0.49 |
| LQQLALGR           | isotopic standard  | RBM15   | RBM15 OTT OTT1             | 1.37 | 0.45 | 0.80 |
| LISDSVER           | isotopic standard  | ZC3H13  | ZC3H13 KIAA0853            | 6.08 | 1.75 | 3.72 |
| LAGSELFAC          | surrogate standard | ZC3H13  | ZC3H13 KIAA0853            | 1.90 | 1.02 | 1.28 |
| FCLQYTR            | surrogate standard | EIF3A   | EIF3A EIF3S10 KIAA0139     | 0.23 | 0.43 | 0.22 |

|                  |                    |            |                        |      |      |      |
|------------------|--------------------|------------|------------------------|------|------|------|
| VLLATLSIPITPER   | isotopic standard  | EIF3A      | EIF3A EIF3S10 KIAA0139 | 0.28 | 0.52 | 0.18 |
| LTSLVPFVDAFQLER  | surrogate standard | EIF3A      | EIF3A EIF3S10 KIAA0139 | 0.01 | 0.11 | 0.01 |
| TSIFWNDVK        | surrogate standard | EIF3B      | EIF3B EIF3S9           | 0.11 | 0.04 | 0.08 |
| GTQGVVTFEIFR     | isotopic standard  | EIF3B      | EIF3B EIF3S9           | 0.21 | 0.30 | 0.26 |
| FAVLHGEAPR       | surrogate standard | EIF3B      | EIF3B EIF3S9           | 0.27 | 0.63 | 0.52 |
| LFIGGLSFETTEESLR | surrogate standard | HNRNPA 2B1 | HNRNPA2B1 HNRPA2B1     | 0.83 | 1.72 | 1.05 |
| EESGKPGAHVTVK    | surrogate standard | HNRNPA 2B1 | HNRNPA2B1 HNRPA2B1     | 0.99 | 1.08 | 0.90 |
| IDTIEITDR        | isotopic standard  | HNRNPA 2B1 | HNRNPA2B1 HNRPA2B1     | 1.65 | 0.58 | 1.13 |
| TLETVPLER        | surrogate standard | HNRNPA 2B1 | HNRNPA2B1 HNRPA2B1     | 1.36 | 1.51 | 1.97 |
| GFAFVQYVNER      | isotopic standard  | HNRNPC     | HNRNPC HNRPC           | 0.62 | 0.74 | 0.75 |
| MIAGQVLDINLAAEPK | surrogate standard | HNRNPC     | HNRNPC HNRPC           | 1.68 | 0.89 | 0.97 |
| VPPPPPIAR        | surrogate standard | HNRNPC     | HNRNPC HNRPC           | 0.89 | 1.09 | 1.01 |
| TIEDDLVSALVR     | isotopic standard  | PUS1       | PUS1 PP8985            | 0.27 | 0.33 | 0.57 |
| LSAETLQQVNR      | surrogate standard | PUS1       | PUS1 PP8985            | 0.57 | 0.40 | 0.45 |
| GYAPESVLER       | surrogate standard | PUS1       | PUS1 PP8985            | 0.41 | 0.33 | 0.30 |
| AAAAVVAAR        | isotopic standard  | TRUB1      | TRUB1 PUS4             | 0.99 | 0.54 | 0.51 |
| GPTSAELLNR       | surrogate standard | TRUB1      | TRUB1 PUS4             | 1.27 | 0.60 | 0.47 |
| GVLVVGIGSGTK     | surrogate standard | TRUB1      | TRUB1 PUS4             | 0.69 | 0.66 | 0.36 |
| IMLPGVLR         | surrogate standard | DKC1       | DKC1 NOLA4             | 0.65 | 0.73 | 0.36 |
| EVVAEVVK         | isotopic standard  | DKC1       | DKC1 NOLA4             | 1.04 | 1.50 | 1.20 |
| LHNAIEGGTQLSR    | surrogate standard | DKC1       | DKC1 NOLA4             | 1.16 | 0.78 | 1.23 |
| NLAANDLSPSR      | surrogate standard | NSUN4      | NSUN4                  | 0.97 | 0.64 | 0.89 |
| VLVDVPCTTDR      | isotopic standard  | NSUN4      | NSUN4                  | 0.86 | 0.93 | 0.99 |
| YAMDVENK         | isotopic standard  | TRDMT1     | TRDMT1 DNMT2           | 0.23 | 0.64 | 0.63 |

|                             |                    |         |                           |      |      |      |
|-----------------------------|--------------------|---------|---------------------------|------|------|------|
| SLGTADVFER                  | surrogate standard | ALYREF  | THOC4                     | 1.81 | 0.98 | 1.53 |
| QQLSAEELDAQLDAY<br>NAR      | isotopic standard  | ALYREF  | THOC4                     | 1.79 | 0.86 | 2.11 |
| GPMETGLFPGSNATF<br>R        | surrogate standard | METTL8  | METTL8                    | 2.31 | 1.00 | 0.62 |
| ILAWAPVEPSFSAR              | surrogate standard | PUS3    | PUS3 FKSG32               | 0.36 | 0.09 | 0.08 |
| VLCVGTTPR                   | surrogate standard | ZCCHC4  | ZCCHC4                    | 1.84 | 1.70 | 0.82 |
| MCPGCSDPVQR                 | surrogate standard | CBLL1   | CBLL1 HAKAI RNF188        | 0.90 | 0.91 | 0.75 |
| DLQAHINHR                   | surrogate standard | CBLL1   | CBLL1 HAKAI RNF188        | 2.38 | 0.63 | 1.07 |
| SVLSEGHQR                   | surrogate standard | CIAO1   | CIAO1 WDR39               | 0.62 | 0.61 | 0.54 |
| GTLIQGVLR                   | surrogate standard | DIS3L2  | DIS3L2 FAM6A              | 0.50 | 0.26 | 0.08 |
| YALFSPSDHR                  | surrogate standard | DIS3L2  | DIS3L2 FAM6A              | 0.53 | 1.86 | 0.84 |
| LACDFLAR                    | surrogate standard | FTSJ3   | FTSJ3 SB92                | 0.09 | 0.08 | 0.05 |
| TSVTDFLR                    | surrogate standard | FTSJ3   | FTSJ3 SB92                | 1.56 | 1.24 | 1.15 |
| AANPVDFLSK                  | surrogate standard | FTSJ3   | FTSJ3 SB92                | 1.77 | 1.53 | 1.13 |
| NVGTGLVGAPACGD<br>VMK       | surrogate standard | ISCU    | ISCU NIFUN                | 0.77 | 0.45 | 0.28 |
| TFGCGSAIASSSLATE<br>WVK     | surrogate standard | ISCU    | ISCU NIFUN                | 0.11 | 0.19 | 0.03 |
| TVEEALTIK                   | surrogate standard | ISCU    | ISCU NIFUN                | 0.42 | 0.24 | 0.26 |
| GGVDTAAAPAGGAP<br>PAHAPGPGR | surrogate standard | LAGE3   | LAGE3 DXS9879E ESO3 ITBA2 | 0.79 | 0.25 | 0.26 |
| IASAIVQAR                   | surrogate standard | METTL15 | METTL15 METT5D1           | 0.31 | 0.26 | 0.33 |
| VLSPQDQDVQDNPR              | surrogate standard | METTL15 | METTL15 METT5D1           | 0.07 | 0.14 | 0.56 |
| FLENPDLSQTEEK               | surrogate standard | METTL17 | METTL17 METT11D1          | 1.36 | 0.72 | 0.93 |
| LDGGFAAVSR                  | surrogate standard | METTL17 | METTL17 METT11D1          | 0.37 | 0.04 | 0.12 |
| TAVYSLHK                    | surrogate standard | METTL5  | METTL5 DC3 HSPC133        | 0.82 | 0.30 | 0.34 |
| QNLPLSSGK                   | surrogate standard | MPST    | MPST TST2                 | 0.04 | 0.00 | 0.00 |
| SQPAPAEFR                   | surrogate standard | MPST    | MPST TST2                 | 0.53 | 0.24 | 0.34 |

|                     |                    |        |                          |      |      |      |
|---------------------|--------------------|--------|--------------------------|------|------|------|
| LLDLVQQSCNYK        | surrogate standard | SNU13  | NHP2L1                   | 0.73 | 0.47 | 0.51 |
| NVPYVFVR            | surrogate standard | SNU13  | NHP2L1                   | 0.47 | 0.40 | 0.26 |
| QQIQSIQQSIER        | surrogate standard | SNU13  | NHP2L1                   | 0.73 | 0.50 | 0.58 |
| VPLDPLIGK           | surrogate standard | NUBP1  | NUBP1 NBP NBP1           | 1.41 | 0.37 | 0.30 |
| GQSFFIDAPDSPATLA YR | surrogate standard | NUBP1  | NUBP1 NBP NBP1           | 0.14 | 0.03 | 0.06 |
| TYVTPPGTGFLPGD T AR | surrogate standard | OSGEP  | OSGEP GCPL1              | 0.46 | 0.22 | 0.17 |
| TPLSDSGVTQR         | surrogate standard | OSGEP  | OSGEP GCPL1              | 0.80 | 0.19 | 0.27 |
| SFSGLNSR            | surrogate standard | PRRC2A | PRRC2A BAT2 G2           | 0.98 | 0.57 | 0.44 |
| ATPSTYSGVFR         | surrogate standard | PRRC2A | PRRC2A BAT2 G2           | 1.36 | 1.71 | 0.40 |
| TPQGLSNLAK          | surrogate standard | TP53RK | TP53RK C20orf64 PRPK     | 1.33 | 0.40 | 0.41 |
| GVDLYVLEK           | surrogate standard | TP53RK | TP53RK C20orf64 PRPK     | 0.16 | 0.28 | 0.45 |
| LSSQEESIGTLDDAIIC R | surrogate standard | TPRKB  | TPRKB CGI-121 My019      | 0.15 | 0.32 | 0.37 |
| IQLEPLPLTPK         | surrogate standard | TUT7   | ZCCHC6 HS2 KIAA1711 TUT7 | 3.65 | 1.56 | 4.23 |
| GLLATASEDR          | surrogate standard | WDR6   | WDR6                     | 0.26 | 0.25 | 0.11 |
| AGWTEALR            | surrogate standard | YRDC   | YRDC DRIP3 IRIP          | 0.39 | 0.07 | 0.08 |
| DLNPFTPLVGIR        | surrogate standard | YRDC   | YRDC DRIP3 IRIP          | 0.02 | 0.01 | 0.01 |



**Table S1h. LC-PRM quantification results of RWE proteins in chromatin fraction of *SETD2*<sup>-/-</sup> cells (n = 3) relative to parental HEK293T cells (n = 3).**

| Protein Symbol | SETD2_KO/HEK293T-chromatin-ratio-1 | s.d. | SETD2_KO/HEK293T-chromatin-ratio-2 | s.d. | SETD2_KO/HEK293T-chromatin-ratio-3 | s.d. | Ave. | S.D. | R.S.D. | p-value (one samples t test) |
|----------------|------------------------------------|------|------------------------------------|------|------------------------------------|------|------|------|--------|------------------------------|
| ADAR           | 0.61                               | 0.38 | 0.69                               | 0.27 | 0.99                               | 0.46 | 0.76 | 0.20 | 26%    | 0.179                        |
| ADAT1          | 1.91                               |      | 5.14                               |      | 5.58                               |      | 4.21 | 2.01 | 48%    | 0.109                        |
| ADAT3          | 1.00                               |      | 0.24                               |      | 0.27                               |      | 0.50 | 0.43 | 85%    | 0.182                        |
| BUD23          | 0.46                               | 0.26 | 0.80                               | 0.11 | 0.94                               | 0.21 | 0.73 | 0.25 | 34%    | 0.199                        |
| CDK5RAP1       | 0.41                               | 0.46 | 0.95                               | 0.52 | 0.51                               | 0.24 | 0.62 | 0.28 | 46%    | 0.149                        |
| CDKAL1         | 0.15                               | 0.15 | 0.11                               | 0.07 | 0.23                               | 0.27 | 0.16 | 0.06 | 38%    | 0.002                        |
| CMTR1          | 0.89                               | 0.55 | 0.54                               | 0.29 | 0.58                               | 0.24 | 0.67 | 0.19 | 29%    | 0.095                        |
| APOBEC3G       | 1.06                               |      | 1.05                               |      | 1.44                               |      | 1.19 | 0.22 | 19%    | 0.282                        |
| CMTR2          | 0.10                               |      | 0.15                               |      | 0.24                               |      | 0.16 | 0.07 | 46%    | 0.003                        |
| CTU1           | 0.48                               |      | 0.21                               |      | 0.24                               |      | 0.31 | 0.15 | 48%    | 0.015                        |
| CTU2           | 0.16                               | 0.22 | 0.11                               | 0.02 | 0.09                               | 0.03 | 0.12 | 0.03 | 29%    | 0.001                        |
| DCP2           | 0.64                               |      | 0.35                               |      | 0.15                               |      | 0.38 | 0.24 | 64%    | 0.048                        |
| DIMT1          | 0.87                               | 0.01 | 0.71                               | 0.04 | 0.38                               | 0.14 | 0.65 | 0.25 | 38%    | 0.136                        |
| DUS1L          | 0.29                               | 0.10 | 0.22                               | 0.12 | 0.15                               | 0.14 | 0.22 | 0.07 | 33%    | 0.003                        |
| DUS3L          | 0.32                               | 0.00 | 0.69                               | 0.24 | 0.83                               | 0.12 | 0.62 | 0.26 | 43%    | 0.126                        |
| EIF5A2         | 0.59                               | 0.33 | 0.29                               | 0.07 | 0.26                               | 0.03 | 0.38 | 0.18 | 48%    | 0.028                        |
| ELP1           | 0.51                               |      | 0.41                               |      | 0.25                               |      | 0.39 | 0.13 | 34%    | 0.015                        |
| ELP3           | 0.32                               |      | 0.08                               |      | 0.04                               |      | 0.15 | 0.15 | 101%   | 0.010                        |
| EMG1           | 0.88                               | 0.54 | 0.78                               | 0.21 | 0.98                               | 0.30 | 0.88 | 0.10 | 11%    | 0.168                        |
| FBL            | 0.87                               | 0.40 | 1.20                               | 0.95 | 1.72                               | 0.52 | 1.26 | 0.43 | 34%    | 0.403                        |
| FTSJ1          | 0.34                               | 0.18 | 0.12                               | 0.09 | 0.11                               | 0.08 | 0.19 | 0.13 | 70%    | 0.009                        |
| HSD17B10       | 0.37                               | 0.17 | 0.17                               | 0.07 | 0.23                               | 0.15 | 0.26 | 0.10 | 39%    | 0.006                        |
| LCMT2          | 1.39                               |      | 0.63                               |      | 0.42                               |      | 0.81 | 0.51 | 63%    | 0.585                        |
| MEPCE          | 1.02                               | 0.28 | 0.97                               | 0.41 | 0.60                               | 0.14 | 0.87 | 0.23 | 27%    | 0.420                        |
| MRM1           | 1.12                               | 0.56 | 1.28                               | 0.45 | 1.95                               | 0.18 | 1.45 | 0.44 | 30%    | 0.218                        |

|         |      |      |      |      |      |      |      |      |     |       |
|---------|------|------|------|------|------|------|------|------|-----|-------|
| MRM2    | 1.58 |      | 0.25 |      | 0.69 |      | 0.84 | 0.68 | 80% | 0.725 |
| MRM3    | 0.64 | 0.26 | 0.56 | 0.23 | 0.65 | 0.25 | 0.62 | 0.05 | 8%  | 0.005 |
| MTO1    | 0.83 | 0.43 | 0.23 | 0.08 | 0.41 | 0.28 | 0.49 | 0.31 | 63% | 0.105 |
| NAT10   | 0.72 | 0.18 | 0.47 | 0.31 | 0.29 | 0.19 | 0.50 | 0.22 | 44% | 0.056 |
| NFS1    | 0.99 | 0.26 | 0.53 | 0.17 | 0.67 | 0.14 | 0.73 | 0.23 | 32% | 0.182 |
| NOP2    | 1.45 | 0.32 | 2.32 | 0.76 | 2.77 | 1.58 | 2.18 | 0.67 | 31% | 0.093 |
| NUDT16  | 0.38 | 0.00 | 0.17 | 0.04 | 0.26 | 0.11 | 0.27 | 0.10 | 38% | 0.007 |
| PCIF1   | 0.62 | 0.37 | 0.33 | 0.13 | 0.28 | 0.15 | 0.41 | 0.18 | 45% | 0.031 |
| QTRT1   | 0.82 |      | 0.48 |      | 0.64 |      | 0.64 | 0.17 | 26% | 0.069 |
| RNGTT   | 0.53 | 0.12 | 0.50 | 0.21 | 0.48 | 0.23 | 0.51 | 0.03 | 5%  | 0.001 |
| RNMT    | 1.11 | 0.27 | 0.50 | 0.04 | 0.78 | 0.18 | 0.80 | 0.30 | 38% | 0.364 |
| RPUSD3  | 0.36 | 0.20 | 0.51 | 0.28 | 0.49 | 0.19 | 0.46 | 0.09 | 19% | 0.008 |
| RPUSD4  | 0.81 |      | 0.92 |      | 0.73 |      | 0.82 | 0.10 | 12% | 0.085 |
| TARBP1  | 0.35 | 0.27 | 0.44 | 0.18 | 0.30 | 0.30 | 0.36 | 0.07 | 19% | 0.004 |
| TFB1M   | 0.30 | 0.18 | 0.52 | 0.07 | 0.26 | 0.03 | 0.36 | 0.14 | 39% | 0.015 |
| TGS1    | 0.31 |      | 0.62 |      | 1.12 |      | 0.68 | 0.41 | 60% | 0.311 |
| THG1L   | 0.31 |      | 0.15 |      | 0.03 |      | 0.16 | 0.14 | 86% | 0.009 |
| THUMPD1 | 1.71 |      | 0.16 |      | 0.82 |      | 0.90 | 0.78 | 86% | 0.841 |
| TRIT1   | 0.13 |      | 0.41 |      | 0.28 |      | 0.27 | 0.14 | 50% | 0.012 |
| TRMT1   | 0.58 | 0.72 | 0.23 | 0.17 | 0.12 | 0.10 | 0.31 | 0.24 | 78% | 0.038 |
| TRMT10C | 0.30 | 0.01 | 0.37 | 0.08 | 0.27 | 0.06 | 0.31 | 0.05 | 16% | 0.002 |
| TRMT11  | 0.20 |      | 0.13 |      | 0.46 |      | 0.26 | 0.17 | 66% | 0.018 |
| TRMT112 | 0.47 |      | 0.65 |      | 0.69 |      | 0.61 | 0.12 | 20% | 0.029 |
| TRMT2A  | 0.32 | 0.29 | 0.19 | 0.25 | 0.18 | 0.22 | 0.23 | 0.08 | 34% | 0.004 |
| TRMT5   | 0.91 |      | 0.27 |      | 0.23 |      | 0.47 | 0.38 | 80% | 0.137 |
| TRUB2   | 0.75 | 0.37 | 0.91 | 0.53 | 1.20 | 1.14 | 0.95 | 0.23 | 24% | 0.756 |
| TYW3    | 1.07 |      | 0.38 |      | 0.56 |      | 0.67 | 0.36 | 53% | 0.250 |
| WDR4    | 1.57 |      | 0.56 |      | 0.40 |      | 0.84 | 0.63 | 75% | 0.709 |
| YBX1    | 0.81 | 0.23 | 0.94 | 0.71 | 0.50 | 0.20 | 0.75 | 0.22 | 30% | 0.192 |

|         |      |      |      |      |      |      |      |      |     |       |
|---------|------|------|------|------|------|------|------|------|-----|-------|
| RBMX    | 0.95 | 0.22 | 1.27 | 0.18 | 1.46 | 0.16 | 1.23 | 0.26 | 21% | 0.264 |
| ELAVL1  | 0.82 | 0.02 | 1.09 | 0.03 | 0.93 | 0.13 | 0.95 | 0.13 | 14% | 0.556 |
| SND1    | 0.53 | 0.08 | 0.56 | 0.18 | 0.56 | 0.01 | 0.55 | 0.02 | 3%  | 0.001 |
| FMR1    | 0.60 | 0.27 | 0.41 | 0.10 | 0.24 | 0.12 | 0.42 | 0.18 | 43% | 0.030 |
| LRPPRC  | 0.55 | 0.08 | 0.80 | 0.27 | 0.39 | 0.05 | 0.58 | 0.21 | 36% | 0.073 |
| PUS7L   | 1.23 |      | 0.39 |      | 1.11 |      | 0.91 | 0.46 | 50% | 0.770 |
| ALKBH2  | 0.23 | 0.07 | 0.06 | 0.08 | 0.09 | 0.08 | 0.13 | 0.09 | 72% | 0.004 |
| ALKBH3  | 1.05 | 0.87 | 0.40 | 0.12 | 0.26 | 0.08 | 0.57 | 0.42 | 74% | 0.222 |
| ALKBH4  | 0.64 | 0.35 | 0.50 | 0.32 | 0.49 | 0.32 | 0.55 | 0.08 | 15% | 0.011 |
| ALKBH5  | 1.18 | 0.10 | 1.00 | 0.65 | 1.11 | 0.67 | 1.10 | 0.10 | 9%  | 0.217 |
| FTO     | 0.62 |      |      |      | 0.76 |      | 0.69 | 0.10 | 15% |       |
| YTHDF1  | 0.72 | 0.39 | 0.40 | 0.47 | 0.17 | 0.18 | 0.43 | 0.28 | 65% | 0.07  |
| YTHDF2  | 0.63 | 0.34 | 0.58 | 0.27 | 0.58 | 0.22 | 0.60 | 0.03 | 5%  | 0.00  |
| YTHDF3  | 1.02 | 0.20 | 0.74 | 0.30 | 0.76 | 0.31 | 0.84 | 0.16 | 19% | 0.22  |
| YTHDC1  | 1.16 | 0.17 | 0.67 | 0.06 | 1.11 | 0.39 | 0.98 | 0.27 | 28% | 0.91  |
| YTHDC2  | 1.97 | 1.51 | 3.26 | 2.02 | 2.30 | 2.66 | 2.51 | 0.67 | 27% | 0.06  |
| METTL3  | 0.95 | 0.13 | 0.39 | 0.26 | 0.38 | 0.29 | 0.58 | 0.33 | 57% | 0.15  |
| METTL14 | 0.72 |      | 0.19 |      | 0.47 |      | 0.46 | 0.26 | 57% | 0.07  |
| METTL1  | 0.25 |      | 0.10 |      | 0.03 |      | 0.13 | 0.11 | 87% | 0.01  |
| METTL16 | 0.72 | 0.18 | 0.44 | 0.01 | 0.24 | 0.10 | 0.47 | 0.24 | 52% | 0.06  |
| METTL2B | 0.79 |      | 0.43 |      | 0.54 |      | 0.59 | 0.19 | 31% | 0.06  |
| NSUN2   | 1.18 | 0.33 | 0.87 | 0.04 | 0.92 | 0.24 | 0.99 | 0.17 | 17% | 0.93  |
| NSUN5   | 0.89 | 0.12 | 0.82 | 0.11 | 1.04 | 0.17 | 0.92 | 0.11 | 12% | 0.34  |
| NSUN6   | 0.66 | 0.53 | 0.25 | 0.16 | 0.36 | 0.26 | 0.42 | 0.21 | 50% | 0.04  |
| DNMT1   | 0.71 | 0.38 | 0.60 | 0.14 | 0.71 | 0.39 | 0.67 | 0.07 | 10% | 0.01  |
| TRMT61A | 0.18 | 0.11 | 0.55 | 0.22 | 0.36 | 0.19 | 0.36 | 0.18 | 50% | 0.03  |
| TRMT61B | 0.47 |      | 1.44 |      | 0.48 |      | 0.80 | 0.56 | 70% | 0.59  |
| TRMT6   | 0.34 | 0.20 | 0.46 | 0.22 | 0.41 | 0.33 | 0.40 | 0.06 | 14% | 0.00  |
| PUS7    | 1.06 | 0.27 | 0.43 | 0.07 | 0.29 | 0.06 | 0.59 | 0.41 | 69% | 0.23  |

|           |      |      |      |      |      |      |      |      |     |      |
|-----------|------|------|------|------|------|------|------|------|-----|------|
| IGF2BP1   | 0.73 | 0.60 | 0.56 | 0.36 | 0.71 | 0.35 | 0.67 | 0.09 | 14% | 0.03 |
| IGF2BP2   | 1.34 | 1.22 | 0.64 | 0.19 | 1.08 | 0.64 | 1.02 | 0.36 | 35% | 0.93 |
| IGF2BP3   | 0.95 | 0.77 | 0.93 | 0.56 | 1.00 | 0.51 | 0.96 | 0.04 | 4%  | 0.23 |
| WTAP      | 1.48 | 0.46 | 0.80 | 0.15 | 0.83 | 0.17 | 1.04 | 0.39 | 37% | 0.88 |
| VIRMA     | 1.12 | 0.17 | 0.54 | 0.06 | 0.40 | 0.04 | 0.69 | 0.38 | 55% | 0.29 |
| RBM15B    | 1.28 | 0.06 | 0.98 | 0.12 | 2.10 | 0.96 | 1.46 | 0.58 | 40% | 0.31 |
| RBM15     | 1.35 | 0.03 | 0.48 | 0.05 | 0.65 | 0.22 | 0.83 | 0.46 | 56% | 0.59 |
| ZC3H13    | 3.99 | 2.96 | 1.39 | 0.51 | 2.50 | 1.73 | 2.62 | 1.30 | 50% | 0.16 |
| EIF3A     | 0.17 | 0.14 | 0.35 | 0.22 | 0.14 | 0.11 | 0.22 | 0.12 | 53% | 0.01 |
| EIF3B     | 0.19 | 0.08 | 0.32 | 0.29 | 0.29 | 0.22 | 0.27 | 0.07 | 25% | 0.00 |
| HNRNPA2B1 | 1.21 | 0.37 | 1.22 | 0.51 | 1.26 | 0.48 | 1.23 | 0.03 | 2%  | 0.00 |
| HNRNPC    | 1.06 | 0.55 | 0.91 | 0.18 | 0.91 | 0.14 | 0.96 | 0.09 | 9%  | 0.51 |
| PUS1      | 0.42 | 0.15 | 0.35 | 0.04 | 0.44 | 0.13 | 0.40 | 0.05 | 11% | 0.00 |
| TRUB1     | 0.99 | 0.29 | 0.60 | 0.06 | 0.45 | 0.08 | 0.68 | 0.28 | 41% | 0.18 |
| DKC1      | 0.95 | 0.27 | 1.00 | 0.43 | 0.93 | 0.50 | 0.96 | 0.04 | 4%  | 0.21 |
| NSUN4     | 0.91 | 0.08 | 0.79 | 0.20 | 0.94 | 0.07 | 0.88 | 0.08 | 9%  | 0.13 |
| TRDMT1    | 0.23 |      | 0.64 |      | 0.63 |      | 0.50 | 0.23 | 47% | 0.07 |
| ALYREF    | 1.80 | 0.01 | 0.92 | 0.09 | 1.82 | 0.41 | 1.51 | 0.51 | 34% | 0.23 |
| METTL8    | 2.31 |      | 1.00 |      | 0.62 |      | 1.31 | 0.89 | 68% | 0.61 |
| PUS3      | 0.36 |      | 0.09 |      | 0.08 |      | 0.18 | 0.16 | 91% | 0.01 |
| ZCCHC4    | 1.84 |      | 1.70 |      | 0.82 |      | 1.45 | 0.55 | 38% | 0.29 |
| CBLL1     | 1.64 | 1.05 | 0.77 | 0.20 | 0.91 | 0.23 | 1.11 | 0.47 | 42% | 0.73 |
| CIAO1     | 0.62 |      | 0.61 |      | 0.54 |      | 0.59 | 0.04 | 8%  | 0.00 |
| DIS3L2    | 0.51 | 0.02 | 1.06 | 1.13 | 0.46 | 0.54 | 0.68 | 0.33 | 49% | 0.24 |
| FTSJ3     | 1.14 | 0.91 | 0.95 | 0.77 | 0.78 | 0.63 | 0.96 | 0.18 | 19% | 0.71 |
| ISCU      | 0.43 | 0.33 | 0.29 | 0.14 | 0.19 | 0.14 | 0.30 | 0.12 | 40% | 0.01 |
| LAGE3     | 0.79 |      | 0.25 |      | 0.26 |      | 0.43 | 0.31 | 71% | 0.08 |
| METTL15   | 0.19 | 0.17 | 0.20 | 0.09 | 0.44 | 0.16 | 0.28 | 0.14 | 52% | 0.01 |
| METTL17   | 0.87 | 0.70 | 0.38 | 0.48 | 0.53 | 0.57 | 0.59 | 0.25 | 42% | 0.10 |

|        |      |      |      |      |      |      |      |      |     |      |
|--------|------|------|------|------|------|------|------|------|-----|------|
| METTL5 | 0.82 |      | 0.30 |      | 0.34 |      | 0.49 | 0.29 | 59% | 0.09 |
| MPST   | 0.28 | 0.34 | 0.12 | 0.17 | 0.17 | 0.24 | 0.19 | 0.09 | 45% | 0.00 |
| SNU13  | 0.65 | 0.15 | 0.46 | 0.05 | 0.45 | 0.17 | 0.52 | 0.11 | 21% | 0.02 |
| NUBP1  | 0.77 | 0.90 | 0.20 | 0.24 | 0.18 | 0.17 | 0.38 | 0.34 | 88% | 0.09 |
| OSGEP  | 0.63 | 0.24 | 0.20 | 0.02 | 0.22 | 0.07 | 0.35 | 0.24 | 69% | 0.04 |
| PRRC2A | 1.17 | 0.27 | 1.14 | 0.81 | 0.42 | 0.03 | 0.91 | 0.43 | 47% | 0.75 |
| TP53RK | 0.74 | 0.83 | 0.34 | 0.09 | 0.43 | 0.03 | 0.50 | 0.21 | 42% | 0.06 |
| TPRKB  | 0.15 |      | 0.32 |      | 0.37 |      | 0.28 | 0.12 | 42% | 0.01 |
| TUT7   | 3.65 |      | 1.56 |      | 4.23 |      | 3.15 | 1.40 | 45% | 0.12 |
| WDR6   | 0.26 |      | 0.25 |      | 0.11 |      | 0.21 | 0.09 | 41% | 0.00 |
| YRDC   | 0.20 | 0.26 | 0.04 | 0.04 | 0.05 | 0.05 | 0.10 | 0.09 | 96% | 0.00 |

**Table S1i. LC-PRM quantification results of tryptic peptides from RWE proteins in chromatin fraction of *KAT5*<sup>-/-</sup> cells (n = 3) relative to parental HEK293T cells (n = 3).**

| Peptide                    | standard type      | Protein Symbol | Protein Gene                        | KAT5_KO/HEK293T-chromatin-ratio-1 | KAT5_KO/HEK293T-chromatin-ratio-2 | KAT5_KO/HEK293T-chromatin-ratio-3 |
|----------------------------|--------------------|----------------|-------------------------------------|-----------------------------------|-----------------------------------|-----------------------------------|
| YLNTNPVGGLLLEYAR           | surrogate standard | ADAR           | ADAR ADAR1 DSRAD G1P1 IFI4          | 0.33                              | 0.64                              | 0.87                              |
| VLIGENEK                   | surrogate standard | ADAR           | ADAR ADAR1 DSRAD G1P1 IFI4          | 1.37                              | 0.78                              | 1.44                              |
| DGSAFEDGLR                 | surrogate standard | ADAR           | ADAR ADAR1 DSRAD G1P1 IFI4          | 1.16                              | 0.81                              | 0.94                              |
| GFGVQELK                   | surrogate standard | ADAT1          | ADAT1                               | 1.82                              | 4.08                              | 2.37                              |
| AVGAVVVDPASDR              | surrogate standard | ADAT3          | ADAT3 TAD3                          | 0.90                              | 0.38                              | 0.12                              |
| AVLQLYPENSEQLELI<br>TTQATK | surrogate standard | BUD23          | WBSCR22 MERM1 HUSSY-03<br>PP3381    | 0.16                              | 0.36                              | 0.72                              |
| AGFSGGMVVDYPNSA<br>K       | surrogate standard | BUD23          | WBSCR22 MERM1 HUSSY-03<br>PP3381    | 0.33                              | 0.49                              | 0.53                              |
| ESVFTNER                   | surrogate standard | BUD23          | WBSCR22 MERM1 HUSSY-03<br>PP3381    | 0.40                              | 0.46                              | 0.74                              |
| VIFPDAEMEDVNNPG<br>LR      | surrogate standard | CDK5RAP<br>1   | CDK5RAP1 C20orf34 CGI-05<br>HSPC167 | 0.33                              | 3.57                              | 0.12                              |
| ITSASSQTLR                 | surrogate standard | CDK5RAP<br>1   | CDK5RAP1 C20orf34 CGI-05<br>HSPC167 | 1.23                              | 0.77                              | 0.82                              |
| GNLASYPIDELVDR             | surrogate standard | CDKAL1         | CDKAL1                              | 0.58                              | 0.46                              | 0.39                              |
| DIGTNLPTLLWK               | surrogate standard | CDKAL1         | CDKAL1                              | 0.06                              | 0.14                              | 0.06                              |
| GFGMTLK                    | surrogate standard | CMTR1          | CMTR1 FTSJD2 KIAA0082 MTR1          | 1.83                              | 0.62                              | 0.51                              |
| NTSDVNLLVPLEVIK            | surrogate standard | CMTR1          | CMTR1 FTSJD2 KIAA0082 MTR1          | 0.57                              | 0.31                              | 0.46                              |
| SQIYTDWGR                  | surrogate standard | CMTR1          | CMTR1 FTSJD2 KIAA0082 MTR1          | 1.48                              | 0.57                              | 0.93                              |
| DMATFLAEDPK                | surrogate standard | APOBEC3<br>G   | APOBEC3G MDS019                     | 0.92                              | 0.78                              | 0.94                              |
| TLNEAIEK                   | surrogate standard | CMTR2          | CMTR2 AFT FTSJD1                    | 0.08                              | 0.12                              | 0.26                              |
| GGGLGSPGEGGALP<br>R        | surrogate standard | CTU1           | CTU1 ATPBD3 NCS6                    | 0.31                              | 0.71                              | 0.12                              |
| EELLQTLR                   | surrogate standard | CTU2           | CTU2                                | 0.80                              | 0.13                              | 0.06                              |
| LQTQFPSTVSTVYR             | surrogate standard | CTU2           | CTU2                                | 0.69                              | 0.23                              | 0.09                              |
| LYIIPGIPK                  | surrogate standard | DCP2           | DCP2 NUDT20                         | 0.37                              | 0.49                              | 0.18                              |

|                      |                    |          |                                        |      |      |      |
|----------------------|--------------------|----------|----------------------------------------|------|------|------|
| NPLIINSIDK           | surrogate standard | DIMT1    | DIMT1 DIMT1L HUSSY-05                  | 0.67 | 1.12 | 0.38 |
| LQVLVGDVLK           | surrogate standard | DIMT1    | DIMT1 DIMT1L HUSSY-05                  | 1.78 | 0.77 | 0.22 |
| LQGFEFWSR            | surrogate standard | DUS1L    | DUS1L                                  | 0.25 | 0.27 | 0.10 |
| LSVPVTCK             | surrogate standard | DUS1L    | DUS1L                                  | 0.33 | 0.28 | 0.23 |
| YLETKPADLGPR         | surrogate standard | DUS3L    | DUS3L                                  | 0.83 | 1.72 | 1.42 |
| GTQPPSIR             | surrogate standard | DUS3L    | DUS3L                                  | 1.67 | 0.29 | 0.91 |
| TCGPLTDEDVVR         | surrogate standard | DUS3L    | DUS3L                                  | 1.50 | 1.30 | 1.09 |
| NGFVVLK              | surrogate standard | EIF5A2   | EIF5A2                                 | 1.51 | 0.82 | 0.43 |
| YEDICPSTHNMDVPNIK    | surrogate standard | EIF5A2   | EIF5A2                                 | 0.78 | 0.42 | 0.34 |
| VLVTVFR              | surrogate standard | ELP1     | IKBKAP ELP1 IKAP                       | 0.65 | 0.38 | 0.22 |
| YDPFLQTR             | surrogate standard | ELP3     | ELP3                                   |      | 1.31 | 1.09 |
| LYPTLVIR             | surrogate standard | ELP3     | ELP3                                   | 1.04 | 0.31 | 0.07 |
| TYELLNCDK            | surrogate standard | EMG1     | EMG1 C2F                               | 0.66 | 0.70 | 0.88 |
| VGTSFSIPVSDVR        | surrogate standard | EMG1     | EMG1 C2F                               | 1.01 | 1.15 | 0.68 |
| VSVEYTEK             | surrogate standard | EMG1     | EMG1 C2F                               | 0.36 | 0.32 | 0.61 |
| NVMVEPHR             | surrogate standard | FBL      | FBL FIB1 FLRN                          | 0.32 | 0.20 | 1.69 |
| NLVPGESVYGEK         | surrogate standard | FBL      | FBL FIB1 FLRN                          | 0.65 | 1.15 | 1.30 |
| EFQLFQGVTR           | surrogate standard | FTSJ1    | FTSJ1 JM23                             | 0.16 | 0.05 | 0.07 |
| AVDLCAAPGSWSQVLSQK   | surrogate standard | FTSJ1    | FTSJ1 JM23                             | 0.54 | 0.41 | 0.17 |
| SYPLDLEGGSEYK        | surrogate standard | FTSJ1    | FTSJ1 JM23                             | 0.66 | 0.32 | 0.44 |
| GLVAVITGGASGLGLATAER | surrogate standard | HSD17B10 | HSD17B10 ERAB HADH2 MRPP2 SCHAD XH98G2 | 0.14 | 0.36 | 0.22 |
| DVQTALALAK           | surrogate standard | HSD17B10 | HSD17B10 ERAB HADH2 MRPP2 SCHAD XH98G2 | 1.17 | 0.18 | 0.16 |
| VCNFLASQVPPFSR       | surrogate standard | HSD17B10 | HSD17B10 ERAB HADH2 MRPP2 SCHAD XH98G2 | 0.42 | 0.25 | 0.14 |
| NSCNVGGGGGGFK        | surrogate standard | MEPCE    | MEPCE BCDIN3                           | 0.99 | 0.56 | 0.70 |

|                  |                    |        |                    |      |      |      |
|------------------|--------------------|--------|--------------------|------|------|------|
| FQYGNKYCK        | surrogate standard | MEPCE  | MEPCE BCDIN3       | 1.02 | 0.35 | 0.63 |
| SCFPASLTASR      | surrogate standard | MEPCE  | MEPCE BCDIN3       | 1.55 | 1.07 | 0.99 |
| LLLLDLVPTSR      | surrogate standard | MRM1   | MRM1               | 0.31 | 0.83 | 0.24 |
| NSCPLTPVVSK      | surrogate standard | MRM1   | MRM1               | 0.20 | 0.58 | 0.40 |
| ILEVLPGR         | surrogate standard | MRM2   | FTSJ2 FJH1 MRM2    | 2.87 | 1.16 | 0.53 |
| APSTWEESGLR      | surrogate standard | MRM3   | RNMTL1 MRM3 HC90   | 1.36 | 1.77 | 1.13 |
| DPGNLGTILR       | surrogate standard | MRM3   | RNMTL1 MRM3 HC90   | 1.14 | 0.94 | 0.81 |
| LGFVVGR          | surrogate standard | MTO1   | MTO1 CGI-02        | 0.98 | 0.44 | 0.21 |
| LIPEASISTSR      | surrogate standard | MTO1   | MTO1 CGI-02        | 1.45 | 0.87 | 0.25 |
| SLFVVVGDR        | surrogate standard | NAT10  | NAT10 ALP KIAA1709 | 0.53 | 0.33 | 0.73 |
| LDYLGVSYGLTPR    | surrogate standard | NAT10  | NAT10 ALP KIAA1709 | 0.77 | 0.41 | 0.57 |
| AGPNASIISLK      | surrogate standard | NAT10  | NAT10 ALP KIAA1709 | 0.85 | 0.88 | 1.36 |
| SLEAEGFQVTYLPVQK | surrogate standard | NFS1   | NFS1 NIFS HUSSY-08 | 1.21 | 1.05 | 0.61 |
| AIGTDEDLAHSSIR   | surrogate standard | NFS1   | NFS1 NIFS HUSSY-08 | 1.02 | 0.91 | 0.60 |
| IQDIVGILR        | surrogate standard | NOP2   | NOP2 NOL1 NSUN1    | 2.72 | 2.67 | 4.99 |
| DLAQUALINR       | surrogate standard | NOP2   | NOP2 NOL1 NSUN1    | 1.43 | 2.21 | 3.35 |
| LGVTNTIISHYDGR   | surrogate standard | NOP2   | NOP2 NOL1 NSUN1    | 1.36 | 3.05 | 9.49 |
| GADSELSTVPSVTK   | surrogate standard | NOP2   | NOP2 NOL1 NSUN1    | 1.24 | 2.49 | 5.30 |
| GTDTQTPAVLSPSK   | surrogate standard | NOP2   | NOP2 NOL1 NSUN1    | 2.78 | 3.75 | 9.79 |
| LGFPGGFVDTQDR    | surrogate standard | NUDT16 | NUDT16             | 1.14 | 0.59 | 0.31 |
| EELGEAAAAFR      | surrogate standard | NUDT16 | NUDT16             | 0.76 | 0.19 | 0.29 |
| EIMNDIPIR        | surrogate standard | PCIF1  | PCIF1              | 0.80 | 0.25 | 0.30 |
| LVYCYPVR         | surrogate standard | PCIF1  | PCIF1              | 0.92 | 0.52 | 0.30 |
| LQELSAAYR        | surrogate standard | PCIF1  | PCIF1              | 1.12 | 0.53 | 0.50 |



|                 |                    |         |                          |      |      |      |
|-----------------|--------------------|---------|--------------------------|------|------|------|
| GITTEQLDALGCR   | surrogate standard | QTRT1   | QTRT1 TGT TGUT           | 1.89 | 0.78 | 0.56 |
| YDSQVAEENR      | surrogate standard | RNGTT   | RNGTT CAP1A              | 0.78 | 0.31 | 0.35 |
| FNSQPVGDCDFNVR  | surrogate standard | RNGTT   | RNGTT CAP1A              | 0.75 | 0.52 | 0.56 |
| SVLIGEFLEK      | surrogate standard | RNMT    | RNMT KIAA0398            | 1.04 | 0.49 | 0.31 |
| TFLEFYEEK       | surrogate standard | RNMT    | RNMT KIAA0398            | 1.07 | 0.67 | 0.44 |
| LPLGTLISK       | surrogate standard | RNMT    | RNMT KIAA0398            | 1.65 | 0.67 | 0.30 |
| AQPLAYYEAAVR    | surrogate standard | RPUSD2  | RPUSD2 C15orf19          | 0.73 | 0.65 | 0.14 |
| VGTVLGQR        | surrogate standard | RPUSD3  | RPUSD3                   | 1.06 | 1.22 | 1.22 |
| DTPVELLAPLPYFSR | surrogate standard | RPUSD3  | RPUSD3                   | 0.25 | 0.67 | 0.77 |
| TLQCLGLR        | surrogate standard | RPUSD3  | RPUSD3                   | 1.10 | 1.05 | 1.01 |
| MTLSPSYR        | surrogate standard | RPUSD4  | RPUSD4                   | 0.20 | 0.25 | 0.39 |
| GSGGAGALPEAAR   | surrogate standard | TARBP1  | TARBP1 TRM3 TRP185       | 0.56 | 0.59 | 0.66 |
| LLPVLVQCGGAALR  | surrogate standard | TARBP1  | TARBP1 TRM3 TRP185       | 0.34 | 0.26 | 0.29 |
| IFLDPLLDVLMK    | surrogate standard | TARBP1  | TARBP1 TRM3 TRP185       | 0.08 | 0.05 | 0.10 |
| LPPLPTIR        | surrogate standard | TFB1M   | TFB1M CGI-75             | 0.56 | 0.35 | 0.33 |
| DGPFVYGR        | surrogate standard | TFB1M   | TFB1M CGI-75             | 0.21 | 0.34 | 0.27 |
| YGGIPNFshr      | surrogate standard | TGS1    | TGS1 HCA137 NCOA6IP PIMT | 1.41 | 7.95 | 2.58 |
| VIAIDIDPVK      | surrogate standard | TGS1    | TGS1 HCA137 NCOA6IP PIMT | 2.68 | 0.48 | 0.73 |
| STLALQLGQR      | surrogate standard | TRIT1   | TRIT1 IPT MOD5           | 0.19 | 0.52 | 0.14 |
| DLTCAVITEFAR    | surrogate standard | TRMT1   | TRMT1                    | 0.10 | 0.17 | 0.06 |
| FALEVPGLR       | surrogate standard | TRMT1   | TRMT1                    | 1.24 | 1.15 | 0.32 |
| IPAVTYPK        | surrogate standard | TRMT10C | TRMT10C MRPP1 RG9MTD1    | 0.49 | 0.59 | 0.48 |
| EVPEHITEEELK    | surrogate standard | TRMT10C | TRMT10C MRPP1 RG9MTD1    | 1.43 | 0.77 | 0.75 |
| LLLTSTEK        | surrogate standard | TRMT10C | TRMT10C MRPP1 RG9MTD1    | 0.35 | 0.56 | 0.32 |

|                       |                    |         |                                |      |      |      |
|-----------------------|--------------------|---------|--------------------------------|------|------|------|
| IDALEFLPFEGK          | surrogate standard | TRMT11  | TRMT11 C6orf75 MDS024          | 0.47 | 0.37 | 0.92 |
| GPVEGYEENEEFLR        | surrogate standard | TRMT112 | TRMT112 AD-001 HSPC152 HSPC170 | 0.35 | 0.42 | 0.54 |
| AVLPEGQDVTSGFSR       | surrogate standard | TRMT5   | TRMT5 KIAA1393 TRM5            | 2.35 | 0.71 | 0.45 |
| ILAVIQGSHQK           | surrogate standard | TRUB2   | TRUB2                          | 0.01 | 0.14 | 0.06 |
| DGFFTLDSALLR          | surrogate standard | TRUB2   | TRUB2                          | 0.01 | 0.09 | 1.88 |
| AATPQVAEELEK          | surrogate standard | TRUB2   | TRUB2                          | 0.12 | 0.80 | 0.25 |
| DQFFTTSSCAGR          | surrogate standard | TYW3    | TYW3 C1orf171                  | 1.24 | 0.75 | 0.63 |
| ISVVPTQPGLLLSSSG DGLR | surrogate standard | WDR4    | WDR4                           | 0.35 | 0.27 | 0.45 |
| GAEAAANVTGPGGVPV QGSK | surrogate standard | YBX1    | YBX1 NSEP1 YB1                 | 0.54 | 0.71 | 0.71 |
| NEGSESAPEGQAQQ R      | surrogate standard | YBX1    | YBX1 NSEP1 YB1                 | 0.32 | 0.13 | 0.73 |
| AADPPAENSSAPEAE QGGAE | surrogate standard | YBX1    | YBX1 NSEP1 YB1                 | 0.66 | 0.93 | 0.88 |
| ALEAVFGK              | surrogate standard | RBMX    | RBMX HNRPG RBMXP1              | 0.90 | 1.07 | 1.60 |
| SAPSGPVR              | surrogate standard | RBMX    | RBMX HNRPG RBMXP1              | 1.46 | 0.84 | 1.50 |
| SDLYSSGR              | surrogate standard | RBMX    | RBMX HNRPG RBMXP1              | 1.21 | 0.98 | 1.25 |
| SLFSSIGEVESAK         | surrogate standard | ELAVL1  | HuR                            | 1.22 | 1.19 | 0.89 |
| DVEDMFSR              | surrogate standard | ELAVL1  | HuR                            | 0.71 | 0.63 | 1.04 |
| VLVDQTTGLSR           | surrogate standard | ELAVL1  | HuR                            | 1.00 | 0.98 | 1.12 |
| YTIENPR               | surrogate standard | SND1    | SND1 TDRD11                    | 0.38 | 0.36 | 0.39 |
| EVL PSTR              | surrogate standard | SND1    | SND1 TDRD11                    | 0.33 | 0.31 | 0.34 |
| LGTLSPAFSTR           | surrogate standard | SND1    | SND1 TDRD11                    | 0.47 | 0.52 | 0.45 |
| DINESDEVEVYSR         | surrogate standard | FMR1    | FMR1                           | 0.23 | 0.16 | 0.03 |
| SFLEFAEDVIQVPR        | surrogate standard | FMR1    | FMR1                           | 0.16 | 0.14 | 0.08 |
| IPENIYR               | surrogate standard | LRPPRC  | LRPPRC LRP130                  | 0.71 | 0.56 | 0.43 |
| LQWFCDR               | surrogate standard | LRPPRC  | LRPPRC LRP130                  | 0.16 | 0.70 | 0.51 |

|                   |                    |        |                    |      |      |      |
|-------------------|--------------------|--------|--------------------|------|------|------|
| LDLQNLSELDGR      | surrogate standard | PUS7L  | PUS7L              | 1.19 | 0.82 | 0.53 |
| FGNLVETK          | surrogate standard | PUS7L  | PUS7L              | 1.95 | 0.02 | 0.20 |
| LNIPGCYR          | surrogate standard | PUS7L  | PUS7L              | 0.43 | 0.15 | 0.19 |
| AEGLDCSYTVLFGK    | surrogate standard | ALKBH2 | ALKBH2 ABH2        | 0.54 | 0.40 | 0.14 |
| AEADEIFQELEK      | surrogate standard | ALKBH2 | ALKBH2 ABH2        | 0.00 | 0.02 | 0.25 |
| EVEYFTGALAR       | isotopic standard  | ALKBH2 | ALKBH2 ABH2        | 0.46 | 0.02 | 0.11 |
| SQAIAQPATTAK      | surrogate standard | ALKBH3 | ALKBH3 ABH3 DEPC1  | 0.80 | 0.64 | 0.49 |
| VCLYPGFVDVK       | surrogate standard | ALKBH3 | ALKBH3 ABH3 DEPC1  | 1.38 | 0.96 | 0.81 |
| EDITYQQPR         | isotopic standard  | ALKBH3 | ALKBH3 ABH3 DEPC1  | 2.90 | 0.56 | 0.23 |
| TEGFCGLPSFSR      | surrogate standard | ALKBH4 | ALKBH4 ABH4        | 1.17 | 0.20 | 0.22 |
| SLLVLTGAAR        | surrogate standard | ALKBH4 | ALKBH4 ABH4        | 0.83 | 0.73 | 0.81 |
| ELSAEFGPGGR       | isotopic standard  | ALKBH4 | ALKBH4 ABH4        | 0.88 | 0.84 | 0.39 |
| LFSQDECAK         | surrogate standard | ALKBH5 | ALKBH5 ABH5 OFOXD1 | 1.77 | 0.81 | 1.33 |
| GLYNEHTVDR        | surrogate standard | ALKBH5 | ALKBH5 ABH5 OFOXD1 | 1.97 | 0.66 | 2.00 |
| VSEPVLSLPVR       | isotopic standard  | ALKBH5 | ALKBH5 ABH5 OFOXD1 | 2.04 | 1.57 | 2.36 |
| ILIGNPGCTYK       | surrogate standard | FTO    | FTO KIAA1752       | 0.71 | 2.31 | 1.46 |
| SGPVMGGGLPPPIK    | surrogate standard | YTHDF1 | YTHDF1             | 0.59 | 0.74 | 0.53 |
| SPVDYGTSAVWSQDK   | isotopic standard  | YTHDF1 | YTHDF1             | 0.00 | 0.02 | 0.13 |
| DGLNDDDFEPYLSPEAR | isotopic standard  | YTHDF2 | YTHDF2 HGRG8       | 0.34 | 0.41 | 0.36 |
| LGSTEVASNVPK      | surrogate standard | YTHDF2 | YTHDF2 HGRG8       | 0.82 | 0.83 | 0.63 |
| DVPNSQLR          | surrogate standard | YTHDF2 | YTHDF2 HGRG8       | 0.51 | 0.50 | 0.45 |
| AITDGQAGFGNDTSLK  | isotopic standard  | YTHDF3 | YTHDF3             | 0.86 | 0.88 | 0.68 |
| VPGISSIEQGMTGLK   | isotopic standard  | YTHDF3 | YTHDF3             | 0.57 | 0.49 | 0.44 |
| GNVGIGGSAVPPPIK   | isotopic standard  | YTHDF3 | YTHDF3             | 0.65 | 0.76 | 0.57 |

|                |                    |         |                                  |      |      |      |
|----------------|--------------------|---------|----------------------------------|------|------|------|
| SNNHENVSLAK    | surrogate standard | YTHDC1  | YTHDC1 KIAA1966 YT521            | 2.39 | 0.60 | 1.61 |
| GVWSTLPVNEK    | isotopic standard  | YTHDC1  | YTHDC1 KIAA1966 YT521            | 1.21 | 0.76 | 0.97 |
| LSQSLGLVSK     | surrogate standard | YTHDC2  | YTHDC2                           | 1.17 | 1.17 | 0.84 |
| VVLIVGETGSGK   | isotopic standard  | YTHDC2  | YTHDC2                           | 1.00 | 0.90 | 0.62 |
| LAAIAVAER      | surrogate standard | YTHDC2  | YTHDC2                           | 6.82 | 4.15 | 4.11 |
| NPEAALSPTFR    | isotopic standard  | METTL3  | METTL3 MTA70                     | 1.31 | 0.95 | 0.70 |
| YLDVSILGK      | surrogate standard | METTL3  | METTL3 MTA70                     | 1.24 | 0.27 | 0.24 |
| LEIDEIAAPR     | isotopic standard  | METTL14 | METTL14 KIAA1627                 | 0.96 | 0.20 | 0.31 |
| NFPAIFR        | surrogate standard | METTL1  | METTL1 C12orf1                   | 2.16 | 0.78 | 0.28 |
| VTYTEFCQGR     | surrogate standard | METTL16 | METTL16 METT10D                  | 1.55 | 0.87 | 0.42 |
| LPGVAGQYLK     | surrogate standard | METTL16 | METTL16 METT10D                  | 1.52 | 0.77 | 0.40 |
| TQTPPVEENVTK   | isotopic standard  | METTL2B | METTL2B                          | 0.30 | 0.47 | 0.17 |
| VQNLVDR        | surrogate standard | METTL2B | METTL2B                          | 0.76 | 1.24 | 0.17 |
| GAEQLAEGGR     | surrogate standard | NSUN2   | NSUN2 SAKI TRM4                  | 0.84 | 1.05 | 0.76 |
| FYALDPSFPR     | isotopic standard  | NSUN2   | NSUN2 SAKI TRM4                  | 0.77 | 1.20 | 0.72 |
| ILLTQENPFFR    | surrogate standard | NSUN2   | NSUN2 SAKI TRM4                  | 0.15 | 0.49 | 0.26 |
| VLVYELLGK      | surrogate standard | NSUN5   | NSUN5 NSUN5A WBSCR20<br>WBSCR20A | 0.17 | 0.51 | 0.37 |
| QLEPPGAGTSPVVR | surrogate standard | NSUN5   | NSUN5 NSUN5A WBSCR20<br>WBSCR20A | 1.16 | 1.08 | 1.19 |
| DALQQNPGAFR    | surrogate standard | NSUN5   | NSUN5 NSUN5A WBSCR20<br>WBSCR20A | 0.95 | 1.05 | 0.75 |
| NLLDELQK       | surrogate standard | NSUN6   | NSUN6 NOPD1                      | 1.78 | 1.60 | 0.42 |
| QNALLGLNSIR    | surrogate standard | NSUN6   | NSUN6 NOPD1                      | 0.07 | 0.06 | 0.10 |
| EVASYQLQR      | isotopic standard  | NSUN6   | NSUN6 NOPD1                      | 0.71 | 0.43 | 0.35 |
| GAGLSCEQLK     | surrogate standard | NSUN6   | NSUN6 NOPD1                      | 1.52 | 0.71 | 0.40 |
| FFLLENVR       | isotopic standard  | DNMT1   | DNMT1 AIM CXXC9 DNMT             | 0.54 | 0.38 | 0.33 |

|                  |                    |         |                            |      |      |      |
|------------------|--------------------|---------|----------------------------|------|------|------|
| SQGFDPDYR        | surrogate standard | DNMT1   | DNMT1 AIM CXXC9 DNMT       | 0.71 | 0.65 | 0.57 |
| FCSFSPCIEQVQR    | surrogate standard | TRMT61A | TRMT61A                    | 0.32 | 0.54 | 0.47 |
| TCQALAAR         | isotopic standard  | TRMT61A | TRMT61A                    | 0.29 | 0.73 | 0.42 |
| HSVDLIGR         | surrogate standard | TRMT61A | TRMT61A                    | 0.47 | 0.40 | 0.43 |
| DISGATEDIK       | isotopic standard  | TRMT61B | TRMT61B                    | 2.98 | 2.47 | 4.14 |
| AATACFGFPK       | isotopic standard  | TRMT6   | TRMT6 KIAA1153 TRM6 CGI-09 | 0.43 | 0.51 | 0.28 |
| SFLSGLYEFPLNK    | surrogate standard | TRMT6   | TRMT6 KIAA1153 TRM6 CGI-09 | 0.09 | 0.42 | 0.26 |
| NYQVLPDR         | surrogate standard | TRMT6   | TRMT6 KIAA1153 TRM6 CGI-09 | 0.57 | 1.32 | 0.56 |
| SLFPGLETK        | surrogate standard | PUS7    | PUS7 KIAA1897              | 1.00 | 0.76 | 0.29 |
| FGTTAVPTYQVGR    | isotopic standard  | PUS7    | PUS7 KIAA1897              | 0.59 | 0.43 | 0.20 |
| QGSPVAAGAPAK     | surrogate standard | IGF2BP1 | IGF2BP1 CRDBP VICKZ1 ZBP1  | 0.94 | 0.89 | 0.75 |
| ITISLQDLTYLPER   | isotopic standard  | IGF2BP1 | IGF2BP1 CRDBP VICKZ1 ZBP1  | 0.14 | 0.23 | 1.17 |
| TVNELQNLTAAEVVVR | surrogate standard | IGF2BP1 | IGF2BP1 CRDBP VICKZ1 ZBP1  | 0.93 | 1.94 | 0.56 |
| LYIGNLSPAVTADDLR | isotopic standard  | IGF2BP2 | IGF2BP2 IMP2 VICKZ2        | 0.30 | 0.41 | 0.53 |
| TVNELQNLTSAEVIVR | surrogate standard | IGF2BP2 | IGF2BP2 IMP2 VICKZ2        | 0.69 | 0.85 | 1.90 |
| FTEEIPLK         | surrogate standard | IGF2BP3 | IGF2BP3 IMP3 KOC1 VICKZ3   | 0.83 | 1.52 | 0.82 |
| ITISPLQELTYLPER  | isotopic standard  | IGF2BP3 | IGF2BP3 IMP3 KOC1 VICKZ3   | 0.13 | 0.43 | 0.51 |
| IAPAEAPDAK       | surrogate standard | IGF2BP3 | IGF2BP3 IMP3 KOC1 VICKZ3   | 2.22 | 1.65 | 1.38 |
| QYEAYVQALEGK     | surrogate standard | WTAP    | WTAP KIAA0105              | 2.46 | 0.83 | 0.98 |
| YTDLNSNDVTGLR    | surrogate standard | WTAP    | WTAP KIAA0105              | 1.28 | 0.90 | 1.26 |
| QVQQPSVAQLR      | isotopic standard  | WTAP    | WTAP KIAA0105              | 1.64 | 1.06 | 1.10 |
| FPCVVYINEVR      | isotopic standard  | VIRMA   | KIAA1429 MSTP054           | 1.10 | 0.56 | 0.57 |
| GLSYLQLK         | surrogate standard | VIRMA   | KIAA1429 MSTP054           | 1.11 | 0.67 | 0.46 |
| NLDADLVR         | isotopic standard  | RBM15B  | RBM15B OTT3                | 2.22 | 1.23 | 3.21 |

|                  |                    |            |                        |      |      |      |
|------------------|--------------------|------------|------------------------|------|------|------|
| QAAGVISLPGVGGSK  | surrogate standard | RBM15B     | RBM15B OTT3            | 1.87 | 1.35 | 1.72 |
| SLSPGGAALGYR     | surrogate standard | RBM15      | RBM15 OTT OTT1         | 1.70 | 0.87 | 0.65 |
| LQQLALGR         | isotopic standard  | RBM15      | RBM15 OTT OTT1         | 1.12 | 0.88 | 1.29 |
| LISDSVER         | isotopic standard  | ZC3H13     | ZC3H13 KIAA0853        | 5.20 | 1.74 | 5.65 |
| LAGSELFAK        | surrogate standard | ZC3H13     | ZC3H13 KIAA0853        | 1.59 | 1.13 | 1.54 |
| FCLQYTR          | surrogate standard | EIF3A      | EIF3A EIF3S10 KIAA0139 | 0.43 | 0.29 | 0.25 |
| VLLATLSIPITPER   | isotopic standard  | EIF3A      | EIF3A EIF3S10 KIAA0139 | 0.43 | 0.51 | 0.35 |
| TSIFWNDVK        | surrogate standard | EIF3B      | EIF3B EIF3S9           | 0.27 | 0.06 | 0.20 |
| GTQGVTNFEIFR     | isotopic standard  | EIF3B      | EIF3B EIF3S9           | 0.28 | 0.38 | 0.36 |
| FAVLHGEAPR       | surrogate standard | EIF3B      | EIF3B EIF3S9           | 0.63 | 0.43 | 0.53 |
| LFIGLSFETTEESLR  | surrogate standard | HNRNPA2 B1 | HNRNPA2B1 HNRPA2B1     | 0.58 | 1.49 | 1.07 |
| EESGKPGAHVTVK    | surrogate standard | HNRNPA2 B1 | HNRNPA2B1 HNRPA2B1     | 0.88 | 0.79 | 1.30 |
| IDTIEITDR        | isotopic standard  | HNRNPA2 B1 | HNRNPA2B1 HNRPA2B1     | 1.44 | 0.49 | 0.94 |
| TLETVPLER        | surrogate standard | HNRNPA2 B1 | HNRNPA2B1 HNRPA2B1     | 1.59 | 1.32 | 1.08 |
| GFAFVQYVNER      | isotopic standard  | HNRNPC     | HNRNPC HNRPC           | 0.74 | 0.74 | 0.97 |
| MIAGQVLDINLAAEPK | surrogate standard | HNRNPC     | HNRNPC HNRPC           | 1.38 | 2.79 | 1.18 |
| VPPPPPIAR        | surrogate standard | HNRNPC     | HNRNPC HNRPC           | 0.94 | 1.15 | 0.88 |
| TIEDDLVSALVR     | isotopic standard  | PUS1       | PUS1 PP8985            | 0.29 | 0.83 | 0.53 |
| LSAETLQQVNR      | surrogate standard | PUS1       | PUS1 PP8985            | 1.06 | 0.85 | 0.39 |
| GYAPESVLER       | surrogate standard | PUS1       | PUS1 PP8985            | 0.66 | 0.51 | 0.30 |
| AAAAVVAAAAR      | isotopic standard  | TRUB1      | TRUB1 PUS4             | 1.04 | 0.74 | 0.68 |
| GPTSAELLNR       | surrogate standard | TRUB1      | TRUB1 PUS4             | 0.98 | 0.69 | 0.41 |
| GVLVVGIGSGTK     | surrogate standard | TRUB1      | TRUB1 PUS4             | 1.00 | 0.75 | 0.51 |
| IMLPGVLR         | surrogate standard | DKC1       | DKC1 NOLA4             | 0.98 | 0.42 | 0.37 |

|                             |                    |        |                           |      |      |      |
|-----------------------------|--------------------|--------|---------------------------|------|------|------|
| EVVAEVVK                    | isotopic standard  | DKC1   | DKC1 NOLA4                | 0.80 | 0.61 | 1.12 |
| LHNAIEGGTQLSR               | surrogate standard | DKC1   | DKC1 NOLA4                | 0.84 | 0.57 | 0.87 |
| NLAANDLSPSR                 | surrogate standard | NSUN4  | NSUN4                     | 1.22 | 1.10 | 0.84 |
| WGELEGDTYDR                 | surrogate standard | NSUN4  | NSUN4                     | 0.20 | 0.23 | 0.40 |
| VLVDVPCTTDR                 | isotopic standard  | NSUN4  | NSUN4                     | 1.21 | 1.20 | 1.03 |
| YAMDVENK                    | isotopic standard  | TRDMT1 | TRDMT1 DNMT2              | 0.72 | 0.71 | 0.99 |
| SLGTADVHFER                 | surrogate standard | ALYREF | THOC4                     | 1.30 | 1.06 | 0.97 |
| QYNGVPLDGR                  | surrogate standard | ALYREF | THOC4                     | 0.42 | 0.22 | 0.36 |
| QQLSAEELDAQLDAY<br>NAR      | isotopic standard  | ALYREF | THOC4                     | 0.77 | 0.78 | 1.52 |
| GPMETGLFPGSNATF<br>R        | surrogate standard | METTL8 | METTL8                    | 2.23 | 1.64 | 0.66 |
| ILAWAPVEPSFSAR              | surrogate standard | PUS3   | PUS3 FKSG32               | 0.52 | 0.31 | 0.11 |
| VLCVGTPR                    | surrogate standard | ZCCHC4 | ZCCHC4                    | 2.09 | 1.17 | 0.90 |
| IILPTEEGYR                  | surrogate standard | ZCCHC4 | ZCCHC4                    | 0.12 | 0.75 | 0.35 |
| MCPGCSDPVQR                 | surrogate standard | CBLL1  | CBLL1 HAKAI RNF188        | 0.77 | 0.71 | 1.00 |
| DLQAHINHR                   | surrogate standard | CBLL1  | CBLL1 HAKAI RNF188        | 1.73 | 0.65 | 0.73 |
| SVLSEGHQR                   | surrogate standard | CIAO1  | CIAO1 WDR39               | 0.43 | 0.45 | 0.53 |
| GTLIQGVLR                   | surrogate standard | DIS3L2 | DIS3L2 FAM6A              | 1.38 | 0.53 | 0.28 |
| LACDFLAR                    | surrogate standard | FTSJ3  | FTSJ3 SB92                | 0.09 | 0.07 | 0.05 |
| TSVTDFLR                    | surrogate standard | FTSJ3  | FTSJ3 SB92                | 1.21 | 0.96 | 1.20 |
| AANPVDFLSK                  | surrogate standard | FTSJ3  | FTSJ3 SB92                | 0.52 | 0.59 | 1.26 |
| NVGTGLVGAPACGDV<br>MK       | surrogate standard | ISCU   | ISCU NIFUN                | 1.69 | 0.70 | 0.48 |
| TFGCGSAIASSSLATE<br>WVK     | surrogate standard | ISCU   | ISCU NIFUN                | 0.50 | 0.07 | 0.08 |
| TVEEALTIK                   | surrogate standard | ISCU   | ISCU NIFUN                | 1.11 | 0.49 | 0.11 |
| GGVDTAAAPAGGAPP<br>AHAPGPGR | surrogate standard | LAGE3  | LAGE3 DXS9879E ESO3 ITBA2 | 1.59 | 0.76 | 0.35 |

|                             |                    |         |                          |      |      |      |
|-----------------------------|--------------------|---------|--------------------------|------|------|------|
| IASAIVQAR                   | surrogate standard | METTL15 | METTL15 METT5D1          | 0.46 | 0.32 | 0.34 |
| VLSPQDQDVQDNPR              | surrogate standard | METTL15 | METTL15 METT5D1          | 0.47 | 0.15 | 0.28 |
| FLENPDLSQLTEEK              | surrogate standard | METTL17 | METTL17 METT11D1         | 1.26 | 0.72 | 0.54 |
| LDGGFAAVSR                  | surrogate standard | METTL17 | METTL17 METT11D1         | 0.10 | 0.05 | 0.12 |
| TAVYSLHK                    | surrogate standard | METTL5  | METTL5 DC3 HSPC133       | 0.85 | 0.51 | 0.53 |
| SVDIEVDLIR                  | surrogate standard | METTL5  | METTL5 DC3 HSPC133       | 0.77 | 0.11 | 0.22 |
| QNLPLSSGK                   | surrogate standard | MPST    | MPST TST2                | 0.12 | 0.08 | 0.00 |
| SQPAPAEFR                   | surrogate standard | MPST    | MPST TST2                | 0.76 | 0.38 | 0.41 |
| LLDLVQQSCNYK                | surrogate standard | SNU13   | NHP2L1                   | 0.92 | 0.51 | 0.70 |
| NVPYVFVR                    | surrogate standard | SNU13   | NHP2L1                   | 0.34 | 0.45 | 0.41 |
| QQIQSIQQSIEER               | surrogate standard | SNU13   | NHP2L1                   | 0.98 | 0.78 | 0.70 |
| VPLDPLIGK                   | surrogate standard | NUBP1   | NUBP1 NBP NBP1           | 1.78 | 0.97 | 0.41 |
| GQSFFIDAPDSPATLA<br>YR      | surrogate standard | NUBP1   | NUBP1 NBP NBP1           | 0.28 | 0.20 | 0.28 |
| TYVTPPGTGFLPGDT<br>AR       | surrogate standard | OSGEP   | OSGEP GCPL1              | 0.76 | 0.93 | 0.58 |
| LVELPYTVK                   | surrogate standard | OSGEP   | OSGEP GCPL1              | 1.95 | 0.52 | 0.07 |
| TPLSDSGVTQR                 | surrogate standard | OSGEP   | OSGEP GCPL1              | 1.10 | 0.59 | 0.46 |
| SFSGLSNR                    | surrogate standard | PRRC2A  | PRRC2A BAT2 G2           | 0.44 | 0.41 | 0.49 |
| ATPSTYSGVFR                 | surrogate standard | PRRC2A  | PRRC2A BAT2 G2           | 0.12 | 0.44 | 0.61 |
| SLTPLDAR                    | surrogate standard | TFB2M   | TFB2M NS5ATP5            | 1.07 | 0.81 | 0.96 |
| TPQGLSNLAK                  | surrogate standard | TP53RK  | TP53RK C20orf64 PRPK     | 1.74 | 0.92 | 0.33 |
| GVDLYVLEK                   | surrogate standard | TP53RK  | TP53RK C20orf64 PRPK     | 0.63 | 0.34 | 0.13 |
| LSSQEEESIGTLDDAII<br>C<br>R | surrogate standard | TPRKB   | TPRKB CGI-121 My019      | 0.06 | 0.39 | 0.41 |
| IQLEPLPLTPK                 | surrogate standard | TUT7    | ZCCHC6 HS2 KIAA1711 TUT7 | 4.07 | 2.69 | 3.22 |
| GLLATASEDR                  | surrogate standard | WDR6    | WDR6                     | 0.61 | 0.36 | 0.23 |



|             |                    |      |                 |      |      |      |
|-------------|--------------------|------|-----------------|------|------|------|
| AGWTEALR    | surrogate standard | YRDC | YRDC DRIP3 IRIP | 0.22 | 0.25 | 0.10 |
| DLNPFPLVGIR | surrogate standard | YRDC | YRDC DRIP3 IRIP | 0.01 | 0.03 | 0.02 |

**Table S1j. LC-PRM quantification results of RWE proteins in chromatin fraction of *KAT5*<sup>-/-</sup> cells (n = 3) relative to parental HEK293T cells (n = 3).**

| Protein Symbol | KAT5_KO/HEK293T-chromatin-ratio-1 | s.d. | KAT5_KO/HEK293T-chromatin-ratio-2 | s.d. | KAT5_KO/HEK293T-chromatin-ratio-3 | s.d. | Ave. | S.D. | R.S.D. | p-value (one samples t test) |
|----------------|-----------------------------------|------|-----------------------------------|------|-----------------------------------|------|------|------|--------|------------------------------|
| ADAR           | 0.95                              | 0.55 | 0.74                              | 0.09 | 1.08                              | 0.31 | 0.93 | 0.17 | 18%    | 0.535                        |
| ADAT1          | 1.82                              |      | 4.08                              |      | 2.37                              |      | 2.76 | 1.18 | 43%    | 0.123                        |
| ADAT3          | 0.90                              |      | 0.38                              |      | 0.12                              |      | 0.47 | 0.40 | 85%    | 0.145                        |
| BUD23          | 0.30                              | 0.12 | 0.44                              | 0.07 | 0.66                              | 0.11 | 0.46 | 0.19 | 40%    | 0.038                        |
| CDK5RAP1       | 0.78                              | 0.64 | 2.17                              | 1.98 | 0.47                              | 0.49 | 1.14 | 0.91 | 79%    | 0.812                        |
| CDKAL1         | 0.32                              | 0.37 | 0.30                              | 0.22 | 0.23                              | 0.23 | 0.28 | 0.05 | 18%    | 0.002                        |
| CMTR1          | 1.29                              | 0.65 | 0.50                              | 0.17 | 0.63                              | 0.25 | 0.81 | 0.42 | 52%    | 0.514                        |
| APOBEC3G       | 0.92                              |      | 0.78                              |      | 0.94                              |      | 0.88 | 0.09 | 10%    | 0.137                        |
| CMTR2          | 0.08                              |      | 0.12                              |      | 0.26                              |      | 0.16 | 0.09 | 59%    | 0.004                        |
| CTU1           | 0.31                              |      | 0.71                              |      | 0.12                              |      | 0.38 | 0.30 | 79%    | 0.071                        |
| CTU2           | 0.75                              | 0.08 | 0.18                              | 0.07 | 0.07                              | 0.02 | 0.33 | 0.36 | 109%   | 0.085                        |
| DCP2           | 0.37                              |      | 0.49                              |      | 0.18                              |      | 0.34 | 0.15 | 45%    | 0.018                        |
| DIMT1          | 1.22                              | 0.79 | 0.94                              | 0.25 | 0.30                              | 0.11 | 0.82 | 0.47 | 58%    | 0.583                        |
| DUS1L          | 0.29                              | 0.06 | 0.28                              | 0.01 | 0.16                              | 0.09 | 0.24 | 0.07 | 28%    | 0.003                        |
| DUS3L          | 1.34                              | 0.45 | 1.10                              | 0.73 | 1.14                              | 0.26 | 1.19 | 0.13 | 10%    | 0.117                        |
| EIF5A2         | 1.14                              | 0.51 | 0.62                              | 0.28 | 0.39                              | 0.07 | 0.72 | 0.39 | 54%    | 0.333                        |
| ELP1           | 0.65                              |      | 0.38                              |      | 0.22                              |      | 0.42 | 0.22 | 52%    | 0.043                        |
| ELP3           | 1.04                              | 0.73 | 0.81                              | 0.70 | 0.58                              | 0.72 | 0.81 | 0.23 | 28%    | 0.283                        |
| EMG1           | 0.68                              | 0.33 | 0.73                              | 0.42 | 0.73                              | 0.14 | 0.71 | 0.03 | 4%     | 0.003                        |
| FBL            | 0.49                              | 0.23 | 0.67                              | 0.67 | 1.50                              | 0.27 | 0.89 | 0.54 | 61%    | 0.747                        |
| FTSJ1          | 0.45                              | 0.26 | 0.26                              | 0.18 | 0.23                              | 0.19 | 0.31 | 0.12 | 39%    | 0.010                        |
| HSD17B10       | 0.58                              | 0.53 | 0.26                              | 0.09 | 0.17                              | 0.04 | 0.34 | 0.21 | 62%    | 0.032                        |
| MEPCE          | 1.18                              | 0.31 | 0.66                              | 0.37 | 0.77                              | 0.19 | 0.87 | 0.28 | 32%    | 0.505                        |
| MRM1           | 0.26                              | 0.08 | 0.71                              | 0.17 | 0.32                              | 0.11 | 0.43 | 0.24 | 57%    | 0.055                        |
| MRM2           | 2.87                              |      | 1.16                              |      | 0.53                              |      | 1.52 | 1.21 | 80%    | 0.533                        |

|         |      |      |      |      |      |      |      |      |     |       |
|---------|------|------|------|------|------|------|------|------|-----|-------|
| MRM3    | 1.25 | 0.15 | 1.36 | 0.59 | 0.97 | 0.23 | 1.19 | 0.20 | 17% | 0.238 |
| MTO1    | 1.21 | 0.33 | 0.65 | 0.30 | 0.23 | 0.03 | 0.70 | 0.49 | 71% | 0.399 |
| NAT10   | 0.72 | 0.17 | 0.54 | 0.30 | 0.89 | 0.42 | 0.72 | 0.17 | 24% | 0.105 |
| NFS1    | 1.12 | 0.13 | 0.98 | 0.10 | 0.60 | 0.01 | 0.90 | 0.27 | 30% | 0.582 |
| NOP2    | 1.91 | 0.77 | 2.83 | 0.60 | 6.58 | 2.89 | 3.77 | 2.48 | 66% | 0.192 |
| NUDT16  | 0.95 | 0.27 | 0.39 | 0.28 | 0.30 | 0.02 | 0.55 | 0.35 | 65% | 0.157 |
| PCIF1   | 0.95 | 0.17 | 0.44 | 0.16 | 0.37 | 0.11 | 0.58 | 0.32 | 54% | 0.150 |
| QTRT1   | 1.89 |      | 0.78 |      | 0.56 |      | 1.07 | 0.71 | 66% | 0.872 |
| RNGTT   | 0.76 | 0.02 | 0.42 | 0.15 | 0.46 | 0.15 | 0.55 | 0.19 | 35% | 0.053 |
| RNMT    | 1.25 | 0.34 | 0.61 | 0.10 | 0.35 | 0.08 | 0.74 | 0.46 | 63% | 0.431 |
| RPUSD2  | 0.73 |      | 0.65 |      | 0.14 |      | 0.51 | 0.32 | 63% | 0.119 |
| RPUSD3  | 0.80 | 0.48 | 0.98 | 0.28 | 1.00 | 0.23 | 0.93 | 0.11 | 12% | 0.364 |
| RPUSD4  | 0.20 |      | 0.25 |      | 0.39 |      | 0.28 | 0.10 | 36% | 0.006 |
| TARBP1  | 0.33 | 0.24 | 0.30 | 0.27 | 0.35 | 0.29 | 0.33 | 0.02 | 8%  | 0.000 |
| TFB1M   | 0.39 | 0.25 | 0.34 | 0.01 | 0.30 | 0.04 | 0.34 | 0.04 | 12% | 0.001 |
| TGS1    | 2.05 | 0.90 | 4.21 | 5.28 | 1.65 | 1.31 | 2.64 | 1.38 | 52% | 0.176 |
| TRIT1   | 0.19 |      | 0.52 |      | 0.14 |      | 0.28 | 0.20 | 72% | 0.026 |
| TRMT1   | 0.67 | 0.81 | 0.66 | 0.69 | 0.19 | 0.19 | 0.51 | 0.27 | 54% | 0.090 |
| TRMT10C | 0.76 | 0.59 | 0.64 | 0.12 | 0.51 | 0.22 | 0.64 | 0.12 | 19% | 0.036 |
| TRMT11  | 0.47 |      | 0.37 |      | 0.92 |      | 0.58 | 0.30 | 51% | 0.135 |
| TRMT112 | 0.35 |      | 0.42 |      | 0.54 |      | 0.44 | 0.09 | 22% | 0.009 |
| TRMT5   | 2.35 |      | 0.71 |      | 0.45 |      | 1.17 | 1.03 | 88% | 0.802 |
| TRUB2   | 0.05 | 0.06 | 0.34 | 0.40 | 0.73 | 1.00 | 0.37 | 0.34 | 91% | 0.087 |
| TYW3    | 1.24 |      | 0.75 |      | 0.63 |      | 0.87 | 0.32 | 37% | 0.561 |
| WDR4    | 0.35 |      | 0.27 |      | 0.45 |      | 0.36 | 0.09 | 26% | 0.007 |
| YBX1    | 0.51 | 0.17 | 0.59 | 0.42 | 0.78 | 0.09 | 0.62 | 0.14 | 22% | 0.042 |
| RBMX    | 1.19 | 0.28 | 0.96 | 0.12 | 1.45 | 0.18 | 1.20 | 0.24 | 20% | 0.289 |
| ELAVL1  | 0.98 | 0.25 | 0.93 | 0.28 | 1.02 | 0.12 | 0.98 | 0.04 | 4%  | 0.422 |
| SND1    | 0.40 | 0.07 | 0.39 | 0.11 | 0.40 | 0.05 | 0.40 | 0.00 | 0%  | 0.000 |

|         |      |      |      |      |      |      |      |      |     |       |
|---------|------|------|------|------|------|------|------|------|-----|-------|
| FMR1    | 0.20 | 0.05 | 0.15 | 0.01 | 0.06 | 0.03 | 0.13 | 0.07 | 54% | 0.002 |
| LRPPRC  | 0.44 | 0.39 | 0.63 | 0.10 | 0.47 | 0.06 | 0.51 | 0.10 | 20% | 0.015 |
| PUS7L   | 1.19 | 0.76 | 0.33 | 0.43 | 0.31 | 0.19 | 0.61 | 0.50 | 83% | 0.310 |
| ALKBH2  | 0.33 | 0.29 | 0.15 | 0.22 | 0.17 | 0.07 | 0.21 | 0.10 | 48% | 0.006 |
| ALKBH3  | 1.69 | 1.08 | 0.72 | 0.21 | 0.51 | 0.29 | 0.97 | 0.63 | 65% | 0.950 |
| ALKBH4  | 0.96 | 0.18 | 0.59 | 0.34 | 0.47 | 0.30 | 0.68 | 0.26 | 38% | 0.159 |
| ALKBH5  | 1.93 | 0.14 | 1.01 | 0.49 | 1.90 | 0.52 | 1.61 | 0.52 | 32% | 0.178 |
| FTO     | 0.71 |      | 2.31 |      | 1.46 |      | 1.49 | 0.80 | 53% | 0.396 |
| YTHDF1  | 0.29 | 0.42 | 0.38 | 0.51 | 0.33 | 0.29 | 0.33 | 0.04 | 12% | 0.001 |
| YTHDF2  | 0.56 | 0.24 | 0.58 | 0.22 | 0.48 | 0.14 | 0.54 | 0.05 | 10% | 0.005 |
| YTHDF3  | 0.69 | 0.15 | 0.71 | 0.20 | 0.56 | 0.12 | 0.66 | 0.08 | 12% | 0.018 |
| YTHDC1  | 1.80 | 0.84 | 0.68 | 0.11 | 1.29 | 0.45 | 1.26 | 0.56 | 45% | 0.512 |
| YTHDC2  | 3.00 | 3.31 | 2.07 | 1.80 | 1.86 | 1.96 | 2.31 | 0.60 | 26% | 0.064 |
| METTL3  | 1.28 | 0.05 | 0.61 | 0.49 | 0.47 | 0.32 | 0.79 | 0.43 | 55% | 0.482 |
| METTL14 | 0.96 |      | 0.20 |      | 0.31 |      | 0.49 | 0.41 | 84% | 0.163 |
| METTL1  | 2.16 |      | 0.78 |      | 0.28 |      | 1.07 | 0.97 | 91% | 0.909 |
| METTL16 | 1.53 | 0.02 | 0.82 | 0.07 | 0.41 | 0.01 | 0.92 | 0.57 | 62% | 0.831 |
| METTL2B | 0.53 | 0.33 | 0.85 | 0.55 | 0.17 | 0.00 | 0.52 | 0.34 | 66% | 0.135 |
| NSUN2   | 0.59 | 0.38 | 0.91 | 0.37 | 0.58 | 0.28 | 0.69 | 0.19 | 28% | 0.109 |
| NSUN5   | 0.76 | 0.52 | 0.88 | 0.32 | 0.77 | 0.41 | 0.80 | 0.07 | 8%  | 0.036 |
| NSUN6   | 1.02 | 0.78 | 0.70 | 0.66 | 0.32 | 0.15 | 0.68 | 0.35 | 52% | 0.255 |
| DNMT1   | 0.63 | 0.12 | 0.51 | 0.19 | 0.45 | 0.17 | 0.53 | 0.09 | 17% | 0.012 |
| TRMT61A | 0.36 | 0.10 | 0.56 | 0.17 | 0.44 | 0.02 | 0.45 | 0.10 | 22% | 0.011 |
| TRMT61B | 2.98 |      | 2.47 |      | 4.14 |      | 3.20 | 0.86 | 27% | 0.047 |
| TRMT6   | 0.36 | 0.24 | 0.75 | 0.50 | 0.36 | 0.17 | 0.49 | 0.22 | 46% | 0.059 |
| PUS7    | 0.79 | 0.29 | 0.60 | 0.23 | 0.25 | 0.06 | 0.55 | 0.28 | 51% | 0.105 |
| IGF2BP1 | 0.67 | 0.46 | 1.02 | 0.86 | 0.83 | 0.31 | 0.84 | 0.17 | 21% | 0.253 |
| IGF2BP2 | 0.50 | 0.27 | 0.63 | 0.31 | 1.22 | 0.97 | 0.78 | 0.38 | 49% | 0.428 |
| IGF2BP3 | 1.06 | 1.07 | 1.20 | 0.67 | 0.90 | 0.44 | 1.05 | 0.15 | 14% | 0.585 |

|           |      |      |      |      |      |      |      |      |     |       |
|-----------|------|------|------|------|------|------|------|------|-----|-------|
| WTAP      | 1.79 | 0.60 | 0.93 | 0.12 | 1.11 | 0.14 | 1.28 | 0.45 | 36% | 0.401 |
| VIRMA     | 1.11 | 0.01 | 0.61 | 0.07 | 0.51 | 0.08 | 0.74 | 0.32 | 43% | 0.297 |
| RBM15B    | 2.04 | 0.25 | 1.29 | 0.09 | 2.47 | 1.05 | 1.93 | 0.60 | 31% | 0.114 |
| RBM15     | 1.41 | 0.41 | 0.88 | 0.01 | 0.97 | 0.45 | 1.08 | 0.28 | 26% | 0.658 |
| ZC3H13    | 3.39 | 2.56 | 1.43 | 0.43 | 3.59 | 2.91 | 2.81 | 1.19 | 42% | 0.120 |
| EIF3A     | 0.43 | 0.00 | 0.40 | 0.16 | 0.30 | 0.07 | 0.38 | 0.07 | 17% | 0.004 |
| EIF3B     | 0.39 | 0.20 | 0.29 | 0.20 | 0.37 | 0.17 | 0.35 | 0.05 | 15% | 0.002 |
| HNRNPA2B1 | 1.12 | 0.48 | 1.02 | 0.46 | 1.10 | 0.15 | 1.08 | 0.05 | 5%  | 0.116 |
| HNRNPC    | 1.02 | 0.33 | 1.56 | 1.08 | 1.01 | 0.15 | 1.20 | 0.32 | 26% | 0.391 |
| PUS1      | 0.67 | 0.39 | 0.73 | 0.19 | 0.41 | 0.12 | 0.60 | 0.17 | 28% | 0.057 |
| TRUB1     | 1.01 | 0.03 | 0.73 | 0.03 | 0.53 | 0.14 | 0.76 | 0.24 | 32% | 0.219 |
| DKC1      | 0.88 | 0.09 | 0.53 | 0.10 | 0.79 | 0.38 | 0.73 | 0.18 | 24% | 0.122 |
| NSUN4     | 0.88 | 0.59 | 0.84 | 0.54 | 0.76 | 0.32 | 0.83 | 0.06 | 8%  | 0.042 |
| TRDMT1    | 0.72 |      | 0.71 |      | 0.99 |      | 0.80 | 0.16 | 20% | 0.165 |
| ALYREF    | 0.83 | 0.44 | 0.69 | 0.43 | 0.95 | 0.58 | 0.82 | 0.13 | 16% | 0.143 |
| METTL8    | 2.23 |      | 1.64 |      | 0.66 |      | 1.51 | 0.79 | 53% | 0.382 |
| PUS3      | 0.52 |      | 0.31 |      | 0.11 |      | 0.31 | 0.21 | 66% | 0.029 |
| ZCCHC4    | 1.11 | 1.39 | 0.96 | 0.30 | 0.63 | 0.39 | 0.90 | 0.25 | 27% | 0.547 |
| CBLL1     | 1.25 | 0.68 | 0.68 | 0.05 | 0.87 | 0.19 | 0.93 | 0.29 | 31% | 0.724 |
| CIAO1     | 0.43 |      | 0.45 |      | 0.53 |      | 0.47 | 0.05 | 12% | 0.003 |
| DIS3L2    | 1.38 |      | 0.53 |      | 0.28 |      | 0.73 | 0.58 | 79% | 0.506 |
| FTSJ3     | 0.61 | 0.56 | 0.54 | 0.45 | 0.84 | 0.68 | 0.66 | 0.16 | 23% | 0.064 |
| ISCU      | 1.10 | 0.60 | 0.42 | 0.32 | 0.22 | 0.22 | 0.58 | 0.46 | 79% | 0.255 |
| LAGE3     | 1.59 |      | 0.76 |      | 0.35 |      | 0.90 | 0.63 | 70% | 0.813 |
| METTL15   | 0.46 | 0.00 | 0.24 | 0.12 | 0.31 | 0.04 | 0.34 | 0.12 | 35% | 0.010 |
| METTL17   | 0.68 | 0.82 | 0.38 | 0.47 | 0.33 | 0.30 | 0.46 | 0.19 | 41% | 0.039 |
| METTL5    | 0.81 | 0.06 | 0.31 | 0.28 | 0.37 | 0.22 | 0.50 | 0.27 | 54% | 0.085 |
| MPST      | 0.44 | 0.45 | 0.23 | 0.21 | 0.21 | 0.29 | 0.29 | 0.13 | 45% | 0.011 |
| SNU13     | 0.75 | 0.36 | 0.58 | 0.17 | 0.60 | 0.17 | 0.64 | 0.09 | 14% | 0.021 |

|        |      |      |      |      |      |      |      |      |     |       |
|--------|------|------|------|------|------|------|------|------|-----|-------|
| NUBP1  | 1.03 | 1.06 | 0.59 | 0.54 | 0.35 | 0.09 | 0.65 | 0.34 | 53% | 0.224 |
| OSGEP  | 1.27 | 0.61 | 0.68 | 0.22 | 0.37 | 0.27 | 0.77 | 0.45 | 59% | 0.479 |
| PRRC2A | 0.28 | 0.22 | 0.43 | 0.02 | 0.55 | 0.09 | 0.42 | 0.13 | 32% | 0.017 |
| TFB2M  | 1.07 |      | 0.81 |      | 0.96 |      | 0.95 | 0.13 | 14% | 0.549 |
| TP53RK | 1.18 | 0.78 | 0.63 | 0.41 | 0.23 | 0.14 | 0.68 | 0.48 | 70% | 0.367 |
| TPRKB  | 0.06 |      | 0.39 |      | 0.41 |      | 0.29 | 0.20 | 68% | 0.024 |
| TUT7   | 4.07 |      | 2.69 |      | 3.22 |      | 3.32 | 0.70 | 21% | 0.029 |
| WDR6   | 0.61 |      | 0.36 |      | 0.23 |      | 0.40 | 0.20 | 49% | 0.034 |
| YRDC   | 0.11 | 0.15 | 0.14 | 0.15 | 0.06 | 0.05 | 0.10 | 0.04 | 38% | 0.001 |
